# Supplementary material for: Base‐Assisted Imidization: A Synthetic Method for the Introduction of Bulky Imide Substituents to Control Packing and Optical Properties of Naphthalene and Perylene Imides
Source: PubMed Central journal article supplement (PMC7496529; doi:10.1002/anie.202004965), 2020-05-27
Supplement: ANIE-59-13401-s001.pdf [file ANIE-59-13401-s001.pdf]

Supporting Information

**Base-Assisted Imidization: A Synthetic Method for the Introduction of Bulky Imide Substituents to Control Packing and Optical Properties of Naphthalene and Perylene Imides**

*Magnus Mahl, Kazutaka Shoyama, Ana-Maria Krause, David Schmidt, and Frank Würthner\**

anie\_202004965\_sm\_miscellaneous\_information.pdf

**Table of Contents**

|                                             |    |
|---------------------------------------------|----|
| General Methods .....                       | 3  |
| Optimization .....                          | 4  |
| Synthesis .....                             | 6  |
| Single crystal X-ray analysis .....         | 11 |
| Optical properties in solution .....        | 23 |
| Optical properties in the solid-state ..... | 27 |
| NMR spectra .....                           | 33 |
| Mass spectra.....                           | 52 |
| References .....                            | 58 |

## General Methods

Unless otherwise stated, all chemicals, reagents and solvents were purchased from commercial suppliers and used without further purification. Column chromatography was performed on silica-gel (particle size 0.040-0.063 mm) and freshly distilled solvents.  $^1\text{H}$  and  $^{13}\text{C}$  NMR spectra were recorded on a Bruker Avance HD III 400 spectrometer and  $^{13}\text{C}$  NMR spectra are broad band proton decoupled. Chemical shift ( $\delta$ ) data are listed in parts per million (ppm), are reported relative to tetramethylsilane and referenced internally to residual proton solvent resonances or natural abundance carbon resonances. Coupling constants ( $J$ ) are reported in Hertz (Hz). MALDI TOF measurements were carried out on a Bruker Daltonics autoflex II LRF or Bruker Daltonics ultrafleXtreme mass spectrometer. ESI TOF spectra were acquired on a Bruker Daltonics micOTOF focus mass spectrometer. EI mass spectra were measured on a Finnigan MAT90. Melting points were measured on an Olympus BX41 polarization microscope and are uncorrected. All spectroscopic measurements were carried out using spectroscopic grade solvents. Thin-films samples were prepared by spin-coating  $10^{-2}$  –  $10^{-3}$  M chloroform solutions (due to low solubility:  $1.2 \times 10^{-4}$  M for **8a**) onto quartz substrates (50  $\mu\text{L}$ , 3000 rpm, 30 s). Subsequently, the quartz substrates were annealed for 5 min at 130  $^\circ\text{C}$  on a precision hot plate from Harry Gestigkeit PZ28-2. UV/Vis absorption spectra in solution were recorded on a Jasco V670 or Jasco V-770-ST spectrometer. For solid-state UV/Vis measurements a Perkin-Elmer 950 with an including integration sphere was used. Fluorescence measurements were conducted on an Edinburgh Instruments FLS980 fluorescence spectrometer. Solid-state fluorescence spectra were recorded with a front face sample holder. The fluorescence quantum yields in solution were determined by using the dilution method ( $A < 0.05$ ) and *N,N'*-Bis[2,6-diisopropylphenyl]perylene-3,4:9,10-bis(dicarboximide) ( $\Phi_f = 100\%$  in chloroform) as a reference. Solid-state fluorescence quantum yields were measured by using a Hamamatsu Photonics C9920-02 integration sphere. Single crystals suitable for X-ray diffraction were measured on a Bruker D8 Quest Diffractometer with a PhotonII detector using  $\text{Cu K}\alpha$  radiation. The structures were solved using direct methods, expanded with Fourier techniques and refined using the SHELX software package.<sup>[S1]</sup> All non-hydrogen atoms were refined anisotropically and hydrogen atoms were assigned idealized positions and were included in calculation of structures factors. Compounds **1a**<sup>[S2]</sup>, **1c**<sup>[S3]</sup>, **1d**<sup>[S4]</sup>, and **12**<sup>[S5]</sup> were synthesized according to literature.

## SUPPORTING INFORMATION

## Optimization

Table S1. Additional optimization for the reaction conditions for **6d**.<sup>[a]</sup>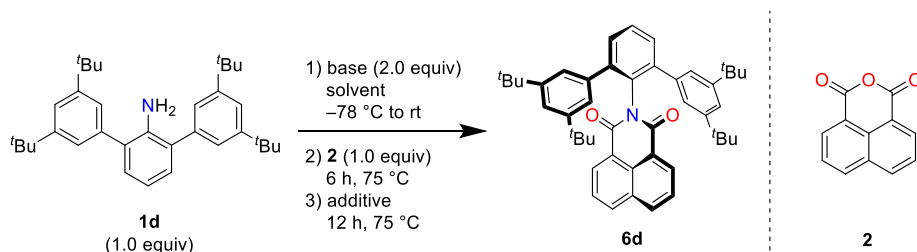

| entry            | base                              | solvent | additive (equiv)            | yield [%] <sup>[b]</sup> |
|------------------|-----------------------------------|---------|-----------------------------|--------------------------|
| 1                | LDA                               | THF     | EtOH (5.0)                  | -                        |
| 2                | LDA                               | THF     | 10% HCl <sub>aq</sub> (5.0) | 42                       |
| 3 <sup>[c]</sup> | LDA                               | toluene | H <sub>2</sub> O (5.0)      | 12                       |
| 4 <sup>[d]</sup> | LDA                               | DME     | H <sub>2</sub> O (5.0)      | 9                        |
| 5 <sup>[e]</sup> | LDA                               | diglyme | H <sub>2</sub> O (5.0)      | 14                       |
| 6 <sup>[e]</sup> | LDA                               | DGDEE   | H <sub>2</sub> O (5.0)      | 7                        |
| 7                | LiTMP                             | THF     | H <sub>2</sub> O (5.0)      | 12                       |
| 8                | KHMDS                             | THF     | H <sub>2</sub> O (5.0)      | -                        |
| 9 <sup>[f]</sup> | NaH                               | THF     | H <sub>2</sub> O (5.0)      | -                        |
| 10               | LDA/KO <sup>t</sup> Bu            | THF     | H <sub>2</sub> O (5.0)      | 24                       |
| 11               | LDA/P4- <i>t</i> -Bu              | THF     | H <sub>2</sub> O (5.0)      | 38                       |
| 12               | <i>n</i> -BuLi/KO <sup>t</sup> Bu | THF     | H <sub>2</sub> O (5.0)      | -                        |
| 13               | <i>n</i> -BuLi/P4- <i>t</i> -Bu   | THF     | H <sub>2</sub> O (5.0)      | 52                       |
| 14               | <i>n</i> -BuLi/TMEDA              | THF     | H <sub>2</sub> O (5.0)      | 54                       |

[a] Reaction conditions: **1d** (0.1 mmol), base/base-solution (2.0 equiv), **2** (1.0 equiv), *c*(**1d**) = 0.07 M. [b] Isolated yields. [c] Reaction temperature 120 °C. [d] Reaction temperature 100 °C. [e] Reaction temperature 160 °C. [f] Deprotonation step at 75 °C instead of -78 °C. LDA: lithium diisopropylamide; LiTMP: lithium tetramethylpiperidide; KHMDS: potassium bis(trimethylsilyl)amide; BuLi: butyllithium; TMEDA: tetramethylethylenediamine; THF: tetrahydrofuran; DME: dimethoxyethane; diglyme: bis(2-methoxyethyl) ether; DGDEE: bis(2-ethoxyethyl) ether.

## SUPPORTING INFORMATION

**Table S2.** Optimization for the reaction conditions for **9d**.<sup>[a]</sup>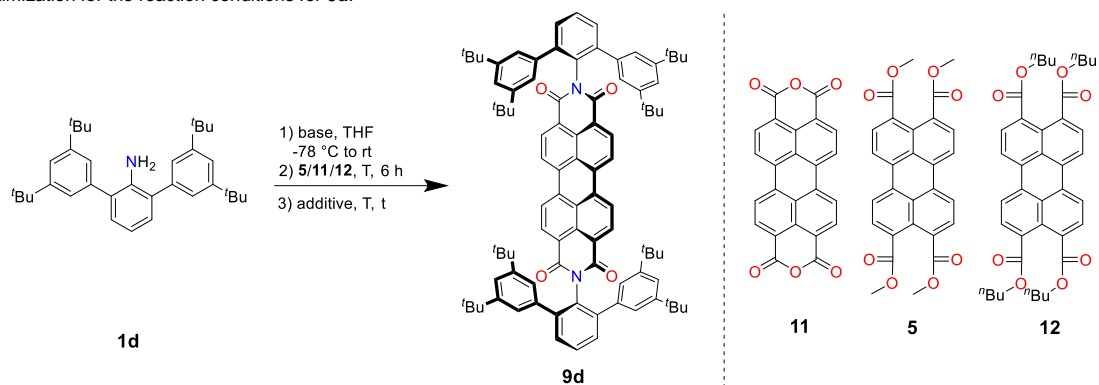

| entry                  | starting material | base           | equiv base | additive (equiv)                                    | T [°C] | t [h] | yield [%] <sup>[b]</sup> |
|------------------------|-------------------|----------------|------------|-----------------------------------------------------|--------|-------|--------------------------|
| 1                      | <b>11</b>         | LDA            | 4.0        | H <sub>2</sub> O (5.0)                              | 75     | 24    | -                        |
| 2                      | <b>11</b>         | <i>n</i> -BuLi | 4.0        | H <sub>2</sub> O (5.0)                              | 75     | 24    | traces                   |
| 3 <sup>[c]</sup>       | <b>11</b>         | <i>n</i> -BuLi | 4.0        | H <sub>2</sub> O (5.0)                              | 75     | 72    | -                        |
| 4 <sup>[d]</sup>       | <b>11</b>         | <i>n</i> -BuLi | 4.0        | H <sub>2</sub> O (5.0)                              | 75     | 24    | -                        |
| 5 <sup>[e]</sup>       | <b>11</b>         | <i>n</i> -BuLi | 4.0        | H <sub>2</sub> O (5.0) / Zn(OAc) <sub>2</sub> (0.3) | 75     | 24    | -                        |
| 6 <sup>[f]</sup>       | <b>11</b>         | <i>n</i> -BuLi | 4.0        | H <sub>2</sub> O (5.0)                              | 110    | 6     | 4                        |
| 7 <sup>[g]</sup>       | <b>11</b>         | <i>n</i> -BuLi | 4.0        | H <sub>2</sub> O (5.0)                              | 75     | 24    | 7                        |
| 8 <sup>[h]</sup>       | <b>11</b>         | <i>n</i> -BuLi | 4.0        | H <sub>2</sub> O (5.0)                              | 90     | 24    | -                        |
| 9 <sup>[i]</sup>       | <b>11</b>         | <i>n</i> -BuLi | 8.0        | H <sub>2</sub> O (10.0)                             | 75     | 24    | -                        |
| 10                     | <b>5</b>          | <i>n</i> -BuLi | 4.0        | -                                                   | 75     | 24    | 14                       |
| 11                     | <b>12</b>         | <i>n</i> -BuLi | 4.0        | -                                                   | 75     | 24    | 13                       |
| 12 <sup>[h]</sup>      | <b>5</b>          | <i>n</i> -BuLi | 4.0        | -                                                   | 90     | 72    | 18                       |
| 13 <sup>[h]</sup>      | <b>12</b>         | <i>n</i> -BuLi | 4.0        | -                                                   | 90     | 72    | 14                       |
| 14 <sup>[f]</sup>      | <b>5</b>          | <i>n</i> -BuLi | 4.0        | -                                                   | 120    | 6     | 10                       |
| 15 <sup>[e], [h]</sup> | <b>5</b>          | <i>n</i> -BuLi | 4.0        | DCC (4.0)                                           | 90     | 72    | traces                   |
| 16 <sup>[h], [i]</sup> | <b>5</b>          | <i>n</i> -BuLi | 8.0        | -                                                   | 90     | 72    | 15                       |

[a] Reaction conditions: **1d** (0.1 mmol), base-solution (2.0 equiv), **5/11/12** (0.5 equiv), 1.5 mL THF. [b] Isolated yields. [c] Addition of water after 24 h. [d] 3.0 mL THF. [e] Addition of additive with **5/12**. [f] Use of microwave. Additive after 2 h. [g] Use of sonication bath in the first 6 hours. [h] Use of pressure resistant Schlenk-tube. [i] Two-fold equivalents of base and additive. [j] Two-fold equivalents of amine and base. LDA: lithium diisopropylamide; BuLi: butyllithium; THF: tetrahydrofuran; DCC: *N,N*-dicyclohexylcarbodiimide.

## SUPPORTING INFORMATION

## Synthesis

**Perylene-3,4-dicarboxylic acid dimethyl ester (4)**

Synthesis of this compound is already reported in literature.<sup>[S6]</sup> We used an alternative route for the synthesis of **4**.

Under nitrogen atmosphere perylene-3,4-dicarboxylic anhydride<sup>[S3]</sup> (948 mg, 2.94 mmol, 1.0 equiv) was suspended in methanol (50 mL) and acetonitrile (100 mL). Subsequently, methyl iodide (2.09 g, 14.7 mmol, 5.0 equiv) was added and the reaction mixture was cooled to 0 °C and 1,8-diazabicyclo[5.4.0]undec-7-ene (DBU) (1.79 g, 11.8 mmol, 4.0 equiv) was added dropwise. The reaction mixture was allowed to warm-up to room temperature and then heated to 65 °C for 6 d. The mixture was cooled to room temperature and carefully added 10% NH<sub>3</sub>(aq)-solution (25 mL) to destroy excess of methyl iodide. The resulting mixture was extracted with dichloromethane. The organic phases were washed with water, dried over MgSO<sub>4</sub> and concentrated under reduced pressure. The crude product was purified by silica-gel column chromatography (chloroform) to yield **4** (831 mg, 2.26 mmol, 77%) as an orange solid. <sup>1</sup>H NMR (400 MHz, CDCl<sub>3</sub>, 298 K): δ = 8.32 (dd, *J* = 0.8 Hz, *J* = 7.7 Hz, 2H; Ar-*H*), 8.27 (d, *J* = 8.0 Hz, 2H; Ar-*H*), 8.04 (d, *J* = 8.0 Hz, 2H; Ar-*H*), 7.81 (dd, *J* = 0.8 Hz, *J* = 8.3 Hz, 2H; Ar-*H*), 7.57 (t, *J* = 7.7 Hz, 2H; Ar-*H*), 3.93 ppm (s, 6H; Ar-H).

**Perylene-3,4,9,10-tetracarboxylic acid tetramethyl ester (5)**

Synthesis of this compound is already reported in literature.<sup>[S7]</sup> We used an alternative route for the synthesis of **5**.

Under nitrogen atmosphere perylene-3,4,9,10-tetracarboxylic dianhydride (4.00 g, 10.2 mmol, 1.0 equiv) was suspended in methanol (50 mL) and acetonitrile (100 mL). Subsequently, methyl iodide (14.5 g, 102 mmol, 10 equiv) was added and the reaction mixture was cooled to 0 °C and 1,8-diazabicyclo[5.4.0]undec-7-ene (DBU) (12.4 g, 81.6 mmol, 8.0 equiv) was added dropwise. The reaction mixture was allowed to warm-up to room temperature and then heated to 65 °C for 6 d. The mixture was cooled down to room temperature and carefully added 10% NH<sub>3</sub>(aq)-solution (50 mL) to destroy excess of methyl iodide. The resulting mixture was extracted with dichloromethane. The organic phases were washed with water, dried over MgSO<sub>4</sub> and concentrated under reduced pressure. The crude product was purified by silica-gel column chromatography (chloroform) to yield **5** (4.21 g, 8.69 mmol, 85%) as an orange solid. <sup>1</sup>H NMR (400 MHz, CDCl<sub>3</sub>, 298 K): δ = 8.37 (d, *J* = 8.0 Hz, 4H; Ar-*H*), 8.09 (d, *J* = 8.0 Hz, 4H; Ar-*H*), 3.95 ppm (s, 12H; Ar-H).

**2,6-Bis(phenylethynyl)aniline (1b)**

A Schlenk-tube was charged with PdCl<sub>2</sub> (136 mg, 767 μmol, 5.5 mol %), CuI (146 mg, 767 μmol, 5.5 mol %) and PPh<sub>3</sub> (146 mg, 1.53 mmol, 11 mol %) under an inert atmosphere and dry triethylamine (190 mL) was added. Subsequently, 2,6-dibromo aniline (3.50 g, 14.0 mmol, 1.0 equiv) and phenylacetylene (4.27 g, 41.8 mmol, 3.0 equiv) were added and the reaction mixture was stirred at 80 °C for 4 d. After the reaction mixture was cooled to room temperature, the solvent was removed under reduced pressure and the residue was dissolved in dichloromethane (75 mL). The solution was washed with water, dried over MgSO<sub>4</sub> and concentrated under reduced pressure. The crude product was purified by silica-gel column chromatography (*n*-hexane/dichloromethane = 10 / 1) to give **1b** (2.24 g, 7.62 mmol, 55%) as a light-brown solid. m.p. 106–107 °C. <sup>1</sup>H NMR (400 MHz, CDCl<sub>3</sub>, 298 K): δ = 7.51–7.57 (m, 4H; Ar-*H*), 7.34–7.40 (m, 8H; Ar-*H*), 6.69 (t, *J* = 7.7 Hz, 1H; Ar-*H*), 4.92 ppm (s, 2H; NH). <sup>13</sup>C NMR (101 MHz, CDCl<sub>3</sub>, 298 K): δ = 149.0, 132.5, 131.6, 128.5, 128.4, 123.2, 117.4, 107.6, 95.1, 85.5 ppm. MS (EI, pos. mode): *m/z*: 293.1 [*M*]<sup>+</sup>. HRMS (ESI-TOF, pos. mode, acetonitrile/chloroform 1/1): *m/z* calcd for C<sub>22</sub>H<sub>15</sub>N+Na<sup>+</sup>: 316.1102 [*M*+Na]<sup>+</sup>; found: 316.1093.

## SUPPORTING INFORMATION

## General method A

In a Schlenk-tube the respective amine **1a–d** (1.0 equiv) was dissolved in dry THF under a nitrogen atmosphere and cooled to  $-78\text{ }^{\circ}\text{C}$ . Subsequently, 1.6 M *n*-BuLi solution in *n*-hexane (2.0 equiv) was added and the reaction mixture was stirred for 1 h at  $-78\text{ }^{\circ}\text{C}$ . The solution was allowed to warm-up to room temperature and the respective anhydride **2–3** (1.0 equiv) was added. The mixture was heated to  $75\text{ }^{\circ}\text{C}$  for 6 h and water (5.0 equiv) was added. The reaction mixture was stirred for another 12 h at  $75\text{ }^{\circ}\text{C}$  and then cooled to room temperature. The resulting mixture was concentrated under reduced pressure. The crude product was purified by silica-gel column chromatography to obtain the respective product. For two-fold imidization equivalents of amine **1a–d**, *n*-BuLi and water were doubled.

## General method B

In a pressure-stable Schlenk-tube the respective amine **1a–d** (1.0 equiv) was dissolved in dry THF under a nitrogen atmosphere and cooled to  $-78\text{ }^{\circ}\text{C}$ . Subsequently, 1.6 M *n*-BuLi solution (2.0 equiv) was added and the reaction mixture was stirred for 1 h at  $-78\text{ }^{\circ}\text{C}$ . The solution was allowed to warm-up to room temperature and the respective ester **4–5** (1.0 equiv) was added. The mixture was heated to  $90\text{ }^{\circ}\text{C}$  for 72 hours (caution: Schlenk-tube under pressure) and then cooled to room temperature. The resulting mixture was concentrated under reduced pressure. The crude product was purified by silica-gel column chromatography to obtain the respective product. For two-fold imidization equivalents of amine **1a–d** and *n*-BuLi were doubled.

***N*-[2,6-(Diphenyl)phenyl]naphthalene-1,8-dicarboximide (6a)**

General method A: **1a** (50.0 mg, 204  $\mu\text{mol}$ , 1.0 equiv), *n*-BuLi (255  $\mu\text{L}$ , 1.6 M in *n*-hexane, 408  $\mu\text{mol}$ , 2.0 equiv), **2** (40.4 mg, 204  $\mu\text{mol}$ , 1.0 equiv), THF (2.9 mL) and water (18.3  $\mu\text{L}$ , 1.02 mmol, 5.0 equiv) were used. The crude product was purified by silica-gel column chromatography (gradient of cyclohexane/dichloromethane from 3/1 to 1/2) and washed with *n*-hexane and methanol. The product was dried under high vacuum to give **6a** (61.3 mg, 144  $\mu\text{mol}$ , 71%) as a white solid. m.p.  $243\text{--}245\text{ }^{\circ}\text{C}$ .  $^1\text{H}$  NMR (400 MHz,  $\text{CDCl}_3$ , 298 K):  $\delta$  = 8.39 (dd,  $J$  = 1.1 Hz,  $J$  = 7.4 Hz, 2H; Ar-*H*), 8.10 (dd,  $J$  = 1.1 Hz,  $J$  = 7.4 Hz, 2H; Ar-*H*), 7.57–7.65 (m, 3H; Ar-*H*), 7.47–7.49 (m, 2H; Ar-*H*), 7.32–7.36 (m, 4H; Ar-*H*), 7.10–7.16 (m, 4H; Ar-*H*), 7.05–7.10 ppm (m, 2H; Ar-*H*).  $^{13}\text{C}$  NMR (101 MHz,  $\text{CDCl}_3$ , 298 K):  $\delta$  = 164.3, 141.8, 139.4, 134.1, 131.59, 131.55, 131.4, 130.3, 129.0, 128.5, 128.4, 128.0, 127.3, 126.8, 122.3 ppm. UV/Vis ( $\text{CHCl}_3$ ):  $\lambda_{\text{max}}$  ( $\epsilon$ ) = 351 nm (12300  $\text{M}^{-1}\text{ cm}^{-1}$ ). MS (MALDI-TOF, pos. mode, DCTB in chloroform):  $m/z$ : 425.1 [ $M$ ] $^+$ . HRMS (ESI-TOF, pos. mode, acetonitrile/chloroform 1/1):  $m/z$  calcd for  $\text{C}_{30}\text{H}_{19}\text{NO}_2+\text{Na}^+$ : 448.1313 [ $M+\text{Na}$ ] $^+$ ; found: 448.1302.

***N*-[2,6-Bis(phenylethynyl)phenyl]naphthalene-1,8-dicarboximide (6b)**

General method A: **1b** (50.0 mg, 170  $\mu\text{mol}$ , 1.0 equiv), *n*-BuLi (213  $\mu\text{L}$ , 1.6 M in *n*-hexane, 341  $\mu\text{mol}$ , 2.0 equiv), **2** (33.8 mg, 170  $\mu\text{mol}$ , 1.0 equiv), THF (2.4 mL) and water (15.3  $\mu\text{L}$ , 852  $\mu\text{mol}$ , 5.0 equiv) were used. The crude product was purified by silica-gel column chromatography (gradient of cyclohexane/dichloromethane from 1/1 to 1/2) and washed with *n*-hexane and methanol. The product was dried under high vacuum to give **6b** (27.8 mg, 58.7  $\mu\text{mol}$ , 34%) as a light-yellow solid. m.p.  $221\text{--}222\text{ }^{\circ}\text{C}$ .  $^1\text{H}$  NMR (400 MHz,  $\text{CDCl}_3$ , 298 K):  $\delta$  = 8.74 (dd,  $J$  = 1.1 Hz,  $J$  = 7.3 Hz, 2H; Ar-*H*), 8.33 (dd,  $J$  = 1.1 Hz,  $J$  = 8.3 Hz, 2H; Ar-*H*), 7.82–7.86 (m, 2H; Ar-*H*), 7.74 (d,  $J$  = 7.7 Hz, 2H; Ar-*H*), 7.48–7.55 (m, 1H; Ar-*H*), 7.17 (tt,  $J$  = 2.3 Hz,  $J$  = 7.4 Hz, 2H; Ar-*H*), 7.06–7.11 (m, 4H; Ar-*H*), 7.00–7.04 ppm (m, 4H; Ar-*H*).  $^{13}\text{C}$  NMR (101 MHz,  $\text{CDCl}_3$ , 298 K):  $\delta$  = 163.6, 139.4, 134.5, 132.6, 132.0, 131.8, 131.6, 128.9, 128.8, 128.5, 128.2, 127.2, 124.1, 122.9, 122.7, 94.1, 85.2 ppm. UV/Vis ( $\text{CHCl}_3$ ):  $\lambda_{\text{max}}$  ( $\epsilon$ ) = 350 nm (10800  $\text{M}^{-1}\text{ cm}^{-1}$ ). MS (MALDI-TOF, pos. mode, DCTB in chloroform):  $m/z$ : 473.1 [ $M$ ] $^+$ . HRMS (ESI-TOF, pos. mode, acetonitrile/chloroform 1/1):  $m/z$  calcd for  $\text{C}_{34}\text{H}_{19}\text{NO}_2+\text{H}^+$ : 474.1416 [ $M+\text{H}$ ] $^+$ ; found: 474.1477.

***N*-[2,6-Bis(4-*tert*-butylphenyl)phenyl]naphthalene-1,8-dicarboximide (6c)**

General method A: **1c** (50.0 mg, 140  $\mu\text{mol}$ , 1.0 equiv), *n*-BuLi (175  $\mu\text{L}$ , 1.6 M in *n*-hexane, 280  $\mu\text{mol}$ , 2.0 equiv), **2** (27.7 mg, 140  $\mu\text{mol}$ , 1.0 equiv), THF (2.0 mL) and water (12.6  $\mu\text{L}$ , 852  $\mu\text{mol}$ , 5.0 equiv) were used. The crude product was purified by silica-gel column chromatography (gradient of cyclohexane/dichloromethane from 1/1 to 1/2) and washed with methanol. The product was dried under high vacuum to give **6c** (48.8 mg, 90.8  $\mu\text{mol}$ , 65%) as a white solid. m.p.  $251\text{--}252\text{ }^{\circ}\text{C}$ .  $^1\text{H}$  NMR (400 MHz,  $\text{CD}_2\text{Cl}_2$ , 298 K):  $\delta$  = 8.36 (dd,  $J$  = 1.2 Hz,  $J$  = 7.3 Hz, 2H; Ar-*H*), 8.15 (dd,  $J$  = 1.1 Hz,  $J$  = 8.2 Hz, 2H; Ar-*H*), 7.59–7.68 (m, 3H; Ar-*H*), 7.47–7.49 (m, 2H; Ar-*H*), 7.19–7.23 (m, 4H; Ar-*H*), 7.11–7.15 (m, 4H; Ar-*H*), 1.08 ppm (s, 18H; Alkyl-*H*).  $^{13}\text{C}$  NMR (101 MHz,  $\text{CDCl}_3$ , 298 K):  $\delta$  = 164.5, 150.0, 141.7, 136.5, 133.8, 132.0, 131.5, 131.3, 130.1, 129.0, 128.4, 128.1, 126.7, 124.9, 122.5, 34.4, 31.2 ppm. UV/Vis ( $\text{CHCl}_3$ ):  $\lambda_{\text{max}}$  ( $\epsilon$ ) = 351 nm (11300  $\text{M}^{-1}\text{ cm}^{-1}$ ). MS (MALDI-TOF, pos. mode, DCTB in chloroform):  $m/z$ : 537.2 [ $M$ ] $^+$ . HRMS (ESI-TOF, pos. mode, acetonitrile/chloroform 1/1):  $m/z$  calcd for  $\text{C}_{38}\text{H}_{35}\text{NO}_2+\text{H}^+$ : 538.2746 [ $M+\text{H}$ ] $^+$ ; found: 538.2741.

***N*-[2,6-Bis(3,5-di-*tert*-butylphenyl)phenyl]naphthalene-1,8-dicarboximide (6d)**

General method A: **1d** (50.0 mg, 106  $\mu\text{mol}$ , 1.0 equiv), *n*-BuLi (133  $\mu\text{L}$ , 1.6 M in *n*-hexane, 212  $\mu\text{mol}$ , 2.0 equiv), **2** (21.1 mg, 106  $\mu\text{mol}$ , 1.0 equiv), THF (1.5 mL) and water (9.6  $\mu\text{L}$ , 532  $\mu\text{mol}$ , 5.0 equiv) were used. The crude product was purified by silica-gel column chromatography (gradient of cyclohexane/dichloromethane from 3/1 to 1/1) and washed with methanol. The product was dried under high vacuum to give **6d** (55.3 mg, 85.1  $\mu\text{mol}$ , 80%) as a white solid. m.p.  $257\text{--}259\text{ }^{\circ}\text{C}$ .  $^1\text{H}$  NMR (400 MHz,  $\text{CDCl}_3$ , 298 K):  $\delta$  = 8.33 (dd,  $J$  = 1.2 Hz,  $J$  = 7.3 Hz, 2H; Ar-*H*), 8.05 (dd,  $J$  = 1.1 Hz,  $J$  = 8.3 Hz, 2H; Ar-*H*), 7.56–7.62 (m, 3H; Ar-*H*), 7.51–7.54 (m, 2H; Ar-*H*), 7.21 (d,  $J$  = 1.9 Hz, 4H; Ar-*H*), 7.06 (t,  $J$  = 1.9 Hz, 2H; Ar-*H*), 1.04 ppm (s, 36H; Alkyl-*H*).  $^{13}\text{C}$  NMR (101 MHz,  $\text{CDCl}_3$ , 298 K):  $\delta$  = 164.0, 149.8, 142.5, 138.4, 133.5, 132.2, 131.2, 130.8, 129.5, 128.8, 128.1, 126.5, 123.0, 122.6, 120.6, 34.6, 31.1 ppm. UV/Vis ( $\text{CHCl}_3$ ):  $\lambda_{\text{max}}$  ( $\epsilon$ ) = 351 nm (11400  $\text{M}^{-1}\text{ cm}^{-1}$ ). MS (MALDI-

## SUPPORTING INFORMATION

TOF, pos. mode, DCTB in chloroform):  $m/z$ : 649.3 [ $M$ ]<sup>+</sup>. HRMS (ESI-TOF, pos. mode, acetonitrile/chloroform 1/1):  $m/z$  calcd for C<sub>46</sub>H<sub>51</sub>NO<sub>2</sub>+H<sup>+</sup>: 650.3998 [ $M+H$ ]<sup>+</sup>; found: 650.3994.

***N,N'*-Bis[2,6-(diphenyl)phenyl]naphthalene-1,4:5,8-bis(dicarboximide) (7a)**

General method A: **1a** (50.0 mg, 204 μmol, 2.0 equiv), *n*-BuLi (255 μL, 1.6 M in *n*-hexane, 408 μmol, 4.0 equiv), **3** (27.3 mg, 102 μmol, 1.0 eq equiv), THF (2.9 mL) and water (18.3 μL, 1.02 mmol, 10.0 equiv) were used. The crude product was purified by silica-gel column chromatography (gradient of cyclohexane/dichloromethane from 1/1 to 1/8) and washed with *n*-hexane and methanol. The product was dried under high vacuum to give **7a** (35.9 mg, 49.7 μmol, 49%) as a white solid. m.p. > 350 °C. <sup>1</sup>H NMR (400 MHz, CD<sub>2</sub>Cl<sub>2</sub>, 298 K): δ = 8.41 (s, 4H; Ar-*H*), 7.62–7.67 (m, 2H; Ar-*H*), 7.47–7.50 (m, 4H; Ar-*H*), 7.21–7.25 (m, 8H; Ar-*H*), 7.09–7.16 ppm (m, 12H; Ar-*H*). <sup>13</sup>C NMR (101 MHz, CD<sub>2</sub>Cl<sub>2</sub>, 298 K): δ = 163.2, 142.1, 139.2, 131.2, 131.1, 130.7, 129.6, 128.5, 128.4, 127.9, 127.1, 126.4 ppm. UV/Vis (CHCl<sub>3</sub>): λ<sub>max</sub> (ε) = 381 nm (24000 M<sup>-1</sup> cm<sup>-1</sup>). MS (MALDI-TOF, pos. mode, DCTB in chloroform):  $m/z$ : 722.1 [ $M$ ]<sup>+</sup>. HRMS (ESI-TOF, pos. mode, acetonitrile/chloroform 1/1):  $m/z$  calcd for C<sub>50</sub>H<sub>30</sub>N<sub>2</sub>O<sub>4</sub>+Na<sup>+</sup>: 745.2103 [ $M+Na$ ]<sup>+</sup>; found: 745.2101.

***N,N'*-Bis[2,6-bis(phenylethynyl)phenyl] naphthalene-1,4:5,8-bis(dicarboximide) (7b)**

General method A: **1b** (50.0 mg, 170 μmol, 2.0 equiv), *n*-BuLi (213 μL, 1.6 M in *n*-hexane, 341 μmol, 4.0 equiv), **3** (22.8 mg, 85.2 μmol, 1.0 equiv), THF (2.4 mL) and water (15.3 μL, 852 μmol, 10.0 equiv) were used. The crude product was purified by silica-gel column chromatography (gradient of cyclohexane/dichloromethane from 1/1 to 1/10) and washed with *n*-hexane and methanol. The product was dried under high vacuum to give **7b** (18.3 mg, 22.3 μmol, 26%) as a light yellow solid. m.p. > 350 °C. <sup>1</sup>H NMR (400 MHz, CDCl<sub>3</sub>, 298 K): δ = 8.94 (s, 4H; Ar-*H*), 7.75 (d, *J* = 7.8 Hz, 4H; Ar-*H*), 7.51–7.56 (m, 2H; Ar-*H*), 7.05–7.10 (m, 4H; Ar-*H*), 6.93–7.02 ppm (m, 16H; Ar-*H*). <sup>13</sup>C NMR (101 MHz, CDCl<sub>3</sub>, 298 K): δ = 162.1, 138.0, 132.9, 131.7, 131.4, 129.5, 128.8, 128.3, 127.4, 127.1, 124.0, 122.3, 94.6, 84.8 ppm. UV/Vis (CHCl<sub>3</sub>): λ<sub>max</sub> (ε) = 378 nm (23100 M<sup>-1</sup> cm<sup>-1</sup>). MS (MALDI-TOF, pos. mode, DCTB in chloroform):  $m/z$ : 818.1 [ $M$ ]<sup>+</sup>. HRMS (ESI-TOF, pos. mode, acetonitrile/chloroform 1/1):  $m/z$  calcd for C<sub>58</sub>H<sub>30</sub>N<sub>2</sub>O<sub>4</sub>+Na<sup>+</sup>: 842.2103 [ $M+Na$ ]<sup>+</sup>; found: 841.2094.

***N,N'*-Bis[2,6-bis(4-*tert*-butylphenyl)phenyl] naphthalene-1,4:5,8-bis(dicarboximide) (7c)**

General method A: **1c** (50.0 mg, 140 μmol, 2.0 equiv), *n*-BuLi (175 μL, 1.6 M in *n*-hexane, 280 μmol, 4.0 equiv), **3** (27.7 mg, 69.9 μmol, 1.0 equiv), THF (2.0 mL) and water (12.6 μL, 852 μmol, 10.0 equiv) were used. The crude product was purified by silica-gel column chromatography (gradient of cyclohexane/dichloromethane from 1/1 to 1/5) and washed with methanol. The product was dried under high vacuum to give **7c** (23.8 mg, 25.1 μmol, 36%) as a white solid. m.p. > 350 °C. <sup>1</sup>H NMR (400 MHz, CD<sub>2</sub>Cl<sub>2</sub>, 298 K): δ = 8.42 (s, 4H; Ar-*H*), 7.60–7.65 (m, 2H; Ar-*H*), 7.46–7.49 (m, 4H; Ar-*H*), 7.09–7.17 (m, 16H; Ar-*H*), 1.08 ppm (s, 36H; Alkyl-*H*). <sup>13</sup>C NMR (101 MHz, CDCl<sub>3</sub>, 298 K): δ = 163.0, 150.3, 141.9, 141.6, 136.2, 131.1, 130.8, 130.3, 129.5, 128.1, 126.2, 125.0, 34.5, 31.3 ppm. UV/Vis (CHCl<sub>3</sub>): λ<sub>max</sub> (ε) = 381 nm (24700 M<sup>-1</sup> cm<sup>-1</sup>). MS (MALDI-TOF, pos. mode, DCTB in chloroform):  $m/z$ : 946.4 [ $M$ ]<sup>+</sup>. HRMS (ESI-TOF, pos. mode, acetonitrile/chloroform 1/1):  $m/z$  calcd for C<sub>66</sub>H<sub>62</sub>N<sub>2</sub>O<sub>4</sub>+Na<sup>+</sup>: 969.4607 [ $M+Na$ ]<sup>+</sup>; found: 969.4604.

***N,N'*-Bis[2,6-bis(3,5-di-*tert*-butylphenyl)phenyl]naphthalene-1,4:5,8-bis(dicarboximide) (7d)**

General method A: **1d** (50.0 mg, 106 μmol, 2.0 equiv), *n*-BuLi (133 μL, 1.6 M in *n*-hexane, 212 μmol, 4.0 equiv), **3** (14.1 mg, 53.2 μmol, 1.0 equiv), THF (1.5 mL) and water (9.6 μL, 532 μmol, 10.0 equiv) were used. The crude product was purified by silica-gel column chromatography (gradient of cyclohexane/dichloromethane from 2/1 to 1/1) and washed with methanol. The product was dried under high vacuum to give **7d** (15.2 mg, 12.9 μmol, 24%) as a white solid. m.p. > 350 °C. <sup>1</sup>H NMR (400 MHz, CDCl<sub>3</sub>, 298 K): δ = 8.33 (s, 4H; Ar-*H*), 7.59–7.63 (m, 2H; Ar-*H*), 7.50–7.53 (m, 4H; Ar-*H*), 7.12 (d, *J* = 1.8 Hz, 8H; Ar-*H*), 7.04 (d, *J* = 1.8 Hz, 4H; Ar-*H*), 1.02 ppm (s, 72H; Alkyl-*H*). <sup>13</sup>C NMR (101 MHz, CDCl<sub>3</sub>, 298 K): δ = 162.7, 151.9, 150.1, 142.5, 138.1, 131.5, 130.4, 129.8, 126.2, 123.0, 120.7, 120.4, 34.8, 31.3 ppm. UV/Vis (CHCl<sub>3</sub>): λ<sub>max</sub> (ε) = 381 nm (23200 M<sup>-1</sup> cm<sup>-1</sup>). MS (MALDI-TOF, pos. mode, DCTB in chloroform):  $m/z$ : 1170.7 [ $M$ ]<sup>+</sup>. HRMS (ESI-TOF, pos. mode, acetonitrile/chloroform 1/1):  $m/z$  calcd for C<sub>82</sub>H<sub>94</sub>N<sub>2</sub>O<sub>4</sub>+Na<sup>+</sup>: 1193.7111 [ $M+Na$ ]<sup>+</sup>; found: 1193.7065.

***N*-[2,6-(Diphenyl)phenyl]perylene-3,4-dicarboximide (8a)**

General method B: **1a** (50.0 mg, 204 μmol, 1.0 equiv), *n*-BuLi (255 μL, 1.6 M in *n*-hexane, 408 μmol, 2.0 equiv), **4** (75.1 mg, 204 μmol, 1.0 equiv) and THF (2.9 mL) were used. The crude product was purified by silica-gel column chromatography (gradient of cyclohexane/dichloromethane from 1/1 to 1/5) and washed with *n*-hexane and methanol. The product was dried under high vacuum to give **8a** (47.6 mg, 86.6 μmol, 42%) as a red solid. m.p. > 350 °C. <sup>1</sup>H NMR (400 MHz, CDCl<sub>3</sub>, 298 K): δ = 8.38 (d, *J* = 8.1 Hz, 2H; Ar-*H*), 8.32 (d, *J* = 7.7 Hz, 2H; Ar-*H*), 8.25 (d, *J* = 8.1 Hz, 2H; Ar-*H*), 7.83 (d, *J* = 8.1 Hz, 2H; Ar-*H*), 7.53–7.63 (m, 3H; Ar-*H*), 7.48–7.52 (m, 2H; Ar-*H*), 7.36–7.40 (m, 4H; Ar-*H*), 7.13–7.19 (m, 4H; Ar-*H*), 7.06–7.11 ppm (m, 2H; Ar-*H*). <sup>13</sup>C NMR (101 MHz, CDCl<sub>3</sub>, 298 K): δ = 164.1, 141.9, 139.5, 137.4, 134.3, 131.73, 131.71, 130.1, 130.3, 130.1, 129.2, 129.0, 128.5, 128.0, 127.9, 127.4, 127.1, 126.8, 123.8, 120.5, 120.1 ppm. UV/Vis (CHCl<sub>3</sub>): λ<sub>max</sub> (ε) / λ<sub>em,max</sub> (φ<sub>fl</sub>) = 510 (29600 M<sup>-1</sup> cm<sup>-1</sup>). fluorescence (CHCl<sub>3</sub>): λ<sub>em,max</sub> (φ<sub>fl</sub>) = 538 nm (87±4%). MS (MALDI-TOF, pos. mode, DCTB in chloroform):  $m/z$ : 549.1 [ $M$ ]<sup>+</sup>. HRMS (ESI-TOF, pos. mode, acetonitrile/chloroform 1/1):  $m/z$  calcd for C<sub>40</sub>H<sub>23</sub>NO<sub>2</sub>+Na<sup>+</sup>: 572.1626 [ $M+Na$ ]<sup>+</sup>; found: 572.1604.



## SUPPORTING INFORMATION

***N*-[2,6-bis(phenylethynyl)phenyl]perylene-3,4-dicarboximide (8b)**

General method B: **1b** (50.0 mg, 170  $\mu\text{mol}$ , 1.0 equiv), *n*-BuLi (213  $\mu\text{L}$ , 1.6 M in *n*-hexane, 341  $\mu\text{mol}$ , 2.0 equiv), **4** (62.8 mg, 170  $\mu\text{mol}$ , 1.0 equiv) and THF (2.4 mL) were used. The crude product was purified by silica-gel column chromatography (gradient of cyclohexane/dichloromethane from 1/1 to 1/2) and washed with *n*-hexane and methanol. The product was dried under high vacuum to give **8b** (24.0 mg, 40.2  $\mu\text{mol}$ , 24%) as a red solid. m.p. 295–297 °C.  $^1\text{H}$  NMR (400 MHz,  $\text{CDCl}_3$ , 298 K):  $\delta$  = 8.71 (d,  $J$  = 8.1 Hz, 2H; Ar-*H*), 8.45–8.49 (m, 4H; Ar-*H*), 7.91–7.94 (m, 2H; Ar-*H*), 7.73 (d,  $J$  = 7.7 Hz, 2H; Ar-*H*), 7.65 (t,  $J$  = 7.7 Hz, 2H; Ar-*H*), 7.47–7.51 (m, 1H; Ar-*H*), 7.02–7.13 ppm (m, 10H; Ar-*H*).  $^{13}\text{C}$  NMR (101 MHz,  $\text{CDCl}_3$ , 298 K):  $\delta$  = 163.4, 139.5, 137.8, 134.5, 132.6, 132.2, 131.7, 131.2, 130.6, 129.4, 128.9, 128.5, 128.2, 128.2, 127.3, 127.2, 124.12, 124.06, 122.8, 121.1, 120.5, 94.1, 85.3 ppm. UV/Vis ( $\text{CHCl}_3$ ):  $\lambda_{\text{max}}$  ( $\epsilon$ ) = 510 nm (30900  $\text{M}^{-1} \text{cm}^{-1}$ ). fluorescence ( $\text{CHCl}_3$ ):  $\lambda_{\text{em,max}}$  ( $\phi_{\text{fl}}$ ) = 540 nm (86 $\pm$ 4%). MS (MALDI-TOF, pos. mode, DCTB in chloroform):  $m/z$ : 597.2 [ $M$ ] $^+$ . HRMS (ESI-TOF, pos. mode, acetonitrile/chloroform 1/1):  $m/z$  calcd for  $\text{C}_{44}\text{H}_{23}\text{NO}_2+\text{Na}^+$ : 620.1626 [ $M+\text{Na}$ ] $^+$ ; found: 620.1623.

***N*-[2,6-bis(4-*tert*-butylphenyl)phenyl]perylene-3,4-dicarboximide (8c)**

General method B: **1c** (50.0 mg, 140  $\mu\text{mol}$ , 1.0 equiv), *n*-BuLi (175  $\mu\text{L}$ , 1.6 M in *n*-hexane, 280  $\mu\text{mol}$ , 2.0 equiv), **4** (51.5 mg, 140  $\mu\text{mol}$ , 1.0 equiv) and THF (2.0 mL) were used. The crude product was purified by silica-gel column chromatography (gradient of cyclohexane/dichloromethane from 2/1 to 1/1) and washed with methanol. The product was dried under high vacuum to give **8c** (37.3 mg, 56.3  $\mu\text{mol}$ , 40%) as a red solid. m.p. >350 °C.  $^1\text{H}$  NMR (400 MHz,  $\text{CDCl}_3$ , 298 K):  $\delta$  = 8.38 (d,  $J$  = 8.1 Hz, 2H; Ar-*H*), 8.34 (d,  $J$  = 7.6 Hz, 2H; Ar-*H*), 8.26 (d,  $J$  = 8.1 Hz, 2H; Ar-*H*), 7.82–7.85 (m, 2H; Ar-*H*), 7.54–7.60 (m, 3H; Ar-*H*), 7.47–7.50 (m, 2H; Ar-*H*), 7.28–7.32 (m, 4H; Ar-*H*), 7.13–7.17 (m, 4H; Ar-*H*), 1.08 ppm (s, 18H; Ar-*H*).  $^{13}\text{C}$  NMR (101 MHz,  $\text{CDCl}_3$ , 298 K):  $\delta$  = 164.2, 150.0, 141.8, 137.0, 136.7, 134.1, 131.9, 131.5, 130.8, 130.3, 130.0, 129.0, 128.9, 128.2, 127.8, 126.9, 126.6, 125.0, 123.6, 120.6, 119.8, 34.5, 31.3 ppm. UV/Vis ( $\text{CHCl}_3$ ):  $\lambda_{\text{max}}$  ( $\epsilon$ ) = 509 nm (31900  $\text{M}^{-1} \text{cm}^{-1}$ ). fluorescence ( $\text{CHCl}_3$ ):  $\lambda_{\text{em,max}}$  ( $\phi_{\text{fl}}$ ) = 539 nm (84 $\pm$ 4%). MS (MALDI-TOF, pos. mode, DCTB in chloroform):  $m/z$ : 661.3 [ $M$ ] $^+$ . HRMS (ESI-TOF, pos. mode, acetonitrile/chloroform 1/1):  $m/z$  calcd for  $\text{C}_{48}\text{H}_{39}\text{NO}_2+\text{Na}^+$ : 684.2878 [ $M+\text{Na}$ ] $^+$ ; found: 684.2839.

***N*-[2,6-bis(3,5-di-*tert*-butylphenyl)phenyl]perylene-3,4-dicarboximide (8d)**

General method B: **1d** (50.0 mg, 106  $\mu\text{mol}$ , 1.0 equiv), *n*-BuLi (133  $\mu\text{L}$ , 1.6 M in *n*-hexane, 212  $\mu\text{mol}$ , 2.0 equiv), **4** (39.2 mg, 106  $\mu\text{mol}$ , 1.0 equiv) and THF (1.5 mL) were used. The crude product was purified by silica-gel column chromatography (gradient of cyclohexane/dichloromethane from 2/1 to 1/2) and washed with methanol. The product was dried under high vacuum to give **8d** (18.8 mg, 24.3  $\mu\text{mol}$ , 23%) as a red solid. m.p. 316–318 °C.  $^1\text{H}$  NMR (400 MHz,  $\text{CDCl}_3$ , 298 K):  $\delta$  = 8.38 (d,  $J$  = 7.8 Hz, 2H; Ar-*H*), 8.35 (d,  $J$  = 8.1 Hz, 2H; Ar-*H*), 8.28 (d,  $J$  = 8.1 Hz, 2H; Ar-*H*), 7.87 (d,  $J$  = 8.1 Hz, 2H; Ar-*H*), 7.57–7.62 (m, 3H; Ar-*H*), 7.52–7.55 (m, 2H; Ar-*H*), 7.24 (d,  $J$  = 1.9 Hz, 4H; Ar-*H*), 7.07 (t,  $J$  = 1.9 Hz, 2H; Ar-*H*), 1.07 ppm (s, 36H; Ar-*H*).  $^{13}\text{C}$  NMR (101 MHz,  $\text{CDCl}_3$ , 298 K):  $\delta$  = 163.8, 149.9, 142.7, 138.5, 136.9, 134.4, 132.5, 131.3, 130.8, 130.0, 129.6, 129.4, 128.9, 128.1, 127.1, 126.7, 123.7, 123.2, 121.1, 120.7, 120.0, 34.8, 31.3 ppm. UV/Vis ( $\text{CHCl}_3$ ):  $\lambda_{\text{max}}$  ( $\epsilon$ ) = 508 nm (31500  $\text{M}^{-1} \text{cm}^{-1}$ ). fluorescence ( $\text{CHCl}_3$ ):  $\lambda_{\text{em,max}}$  ( $\phi_{\text{fl}}$ ) = 534 nm (84 $\pm$ 4%). MS (MALDI-TOF, pos. mode, DCTB in chloroform):  $m/z$ : 773.4 [ $M$ ] $^+$ . HRMS (ESI-TOF, pos. mode, acetonitrile/chloroform 1/1):  $m/z$  calcd for  $\text{C}_{56}\text{H}_{55}\text{NO}_2+\text{Na}^+$ : 796.4130 [ $M+\text{Na}$ ] $^+$ ; found: 796.4103.

***N,N'*-Bis[2,6-(diphenyl)phenyl]perylene-3,4:9,10-bis(dicarboximide) (9a)**

General method B: **1a** (50.0 mg, 204  $\mu\text{mol}$ , 2.0 equiv), *n*-BuLi (255  $\mu\text{L}$ , 1.6 M in *n*-hexane, 408  $\mu\text{mol}$ , 4.0 equiv), **5** (49.4 mg, 102  $\mu\text{mol}$ , 1.0 equiv) and THF (2.9 mL) were used. The crude product was purified by silica-gel column chromatography (gradient of cyclohexane/dichloromethane from 3/1 to 1/3) and washed with *n*-hexane and methanol. The product was dried under high vacuum to give **9a** (16.5 mg, 19.5  $\mu\text{mol}$ , 19%) as a red solid. m.p. >350 °C.  $^1\text{H}$  NMR (400 MHz,  $\text{CD}_2\text{Cl}_2$ , 298 K):  $\delta$  = 8.37 (d,  $J$  = 8.1 Hz, 4H; Ar-*H*), 8.17–8.25 (br, 4H; Ar-*H*), 7.61–7.65 (m, 2H; Ar-*H*), 7.49–7.52 (m, 4H; Ar-*H*), 7.33–7.38 (m, 8H; Ar-*H*), 7.13–7.19 (m, 8H; Ar-*H*), 7.06–7.11 ppm (m, 4H; Ar-*H*).  $^{13}\text{C}$  NMR (101 MHz,  $\text{CDCl}_3$ , 298 K):  $\delta$  = 163.4, 141.8, 139.5, 134.3, 131.4, 131.2, 130.4, 129.3, 129.2, 128.6, 128.1, 127.5, 126.1, 122.6, 122.5 ppm. UV/Vis ( $\text{CHCl}_3$ ):  $\lambda_{\text{max}}$  ( $\epsilon$ ) = 528 nm (77400  $\text{M}^{-1} \text{cm}^{-1}$ ). fluorescence ( $\text{CHCl}_3$ ):  $\lambda_{\text{em,max}}$  ( $\phi_{\text{fl}}$ ) = 535 nm (95 $\pm$ 2%). MS (MALDI-TOF, pos. mode, DCTB in chloroform):  $m/z$ : 846.2 [ $M$ ] $^+$ . HRMS (ESI-TOF, pos. mode, acetonitrile/chloroform 1/1):  $m/z$  calcd for  $\text{C}_{60}\text{H}_{34}\text{N}_2\text{O}_4+\text{Na}^+$ : 869.2416 [ $M+\text{Na}$ ] $^+$ ; found: 869.2484.

***N,N'*-Bis[2,6-di(phenylethynyl)phenyl]perylene-3,4:9,10-bis(dicarboximide) (9b)**

General method B: **1b** (50.0 mg, 170  $\mu\text{mol}$ , 2.0 equiv), *n*-BuLi (213  $\mu\text{L}$ , 1.6 M in *n*-hexane, 341  $\mu\text{mol}$ , 4.0 equiv), **5** (41.3 mg, 85.2  $\mu\text{mol}$ , 1.0 equiv) and THF (2.4 mL) were used. The crude product was purified by silica-gel column chromatography (gradient of cyclohexane/dichloromethane from 1/2 to 0/1) and washed with *n*-hexane and methanol. The product was dried under high vacuum to give **9b** (9.7 mg, 10.3  $\mu\text{mol}$ , 12%) as a red solid. m.p. >350 °C.  $^1\text{H}$  NMR (400 MHz,  $\text{CDCl}_3$ , 298 K):  $\delta$  = 8.84 (d,  $J$  = 8.0 Hz, 4H; Ar-*H*), 8.74 (d,  $J$  = 8.0 Hz, 4H; Ar-*H*), 7.75 (d,  $J$  = 7.9 Hz, 4H; Ar-*H*), 7.50–7.55 (m, 2H; Ar-*H*), 7.04–7.16 ppm (m, 20H; Ar-*H*).  $^{13}\text{C}$  NMR (101 MHz,  $\text{CDCl}_3$ , 298 K):  $\delta$  = 162.8, 138.8, 135.3, 132.8, 132.1, 131.6, 130.1, 129.2, 128.6, 128.3, 127.0, 124.0, 123.6, 123.5, 122.6, 94.2, 85.0 ppm. UV/Vis ( $\text{CHCl}_3$ ):  $\lambda_{\text{max}}$  ( $\epsilon$ ) = 527 nm (78800  $\text{M}^{-1} \text{cm}^{-1}$ ). fluorescence ( $\text{CHCl}_3$ ):  $\lambda_{\text{em,max}}$  ( $\phi_{\text{fl}}$ ) = 534 nm (96 $\pm$ 1%). MS (MALDI-TOF, pos. mode, DCTB in chloroform):  $m/z$ : 942.3 [ $M$ ] $^+$ . HRMS (ESI-TOF, pos. mode, acetonitrile/chloroform 1/1):  $m/z$  calcd for  $\text{C}_{68}\text{H}_{34}\text{N}_2\text{O}_4+\text{Na}^+$ : 965.2416 [ $M+\text{Na}$ ] $^+$ ; found: 965.2419.

***N,N'*-Bis[2,6-bis(4-*tert*-butylphenyl)phenyl]perylene-3,4:9,10-bis(dicarboximide) (9c)**

General method B: **1c** (50.0 mg, 140  $\mu\text{mol}$ , 2.0 equiv), *n*-BuLi (175  $\mu\text{L}$ , 1.6 M in *n*-hexane, 280  $\mu\text{mol}$ , 4.0 equiv), **5** (33.9 mg, 69.9  $\mu\text{mol}$ , 1.0 equiv) and THF (2.0 mL) were used. The crude product was purified by silica-gel column chromatography (gradient of cyclohexane/dichloromethane from 1/1 to 1/5) and washed with *n*-hexane and methanol. The product was dried under high vacuum to give **9c** (15.6 mg, 14.6  $\mu\text{mol}$ , 21%) as a red solid. m.p. >350 °C.  $^1\text{H}$  NMR (400 MHz,  $\text{C}_2\text{D}_2\text{Cl}_4$ ,

## SUPPORTING INFORMATION

373 K):  $\delta$  = 8.43–8.18 (br, 8H; Ar-H, due to broad signal not all protons could be resolved), 7.51–7.56 (m, 2H; Ar-H), 7.44–7.47 (m, 4H; Ar-H), 7.23 (d,  $J$  = 8.3 Hz, 8H; Ar-H), 7.08 (d,  $J$  = 8.3 Hz, 8H; Ar-H), 1.03 ppm (s, 36H; Ar-H).  $^{13}\text{C}$  NMR (101 MHz,  $\text{C}_2\text{D}_2\text{Cl}_4$ , 373 K):  $\delta$  = 163.4, 150.4, 142.1, 136.7, 132.2, 131.1, 130.2, 129.4, 128.91, 128.86, 128.6, 124.7, 123.4, 122.6, 120.6, 34.4, 31.3 ppm. UV/Vis ( $\text{CHCl}_3$ ):  $\lambda_{\text{max}}$  ( $\epsilon$ ) = 528 nm ( $87700 \text{ M}^{-1} \text{ cm}^{-1}$ ). fluorescence ( $\text{CHCl}_3$ ):  $\lambda_{\text{em,max}}$  ( $\phi_{\text{f}}$ ) = 533 nm (97±1%). MS (MALDI-TOF, pos. mode, DCTB in chloroform):  $m/z$ : 1070.4 [ $M$ ] $^+$ . HRMS (ESI-TOF, pos. mode, acetonitrile/chloroform 1/1):  $m/z$  calcd for  $\text{C}_{76}\text{H}_{66}\text{N}_2\text{O}_4+\text{Na}^+$ : 1093.4920 [ $M+\text{Na}$ ] $^+$ ; found: 1093.4865.

***N,N*-Bis[2,6-bis(3,5-di-*tert*-butylphenyl)phenyl]perylene-3,4:9,10-bis(dicarboximide) (9d)**

General method B: **1d** (50.0 mg, 106  $\mu\text{mol}$ , 2.0 equiv), *n*-BuLi (133  $\mu\text{L}$ , 1.6 M in *n*-hexane, 212  $\mu\text{mol}$ , 4.0 equiv), **5** (25.8 mg, 53.2  $\mu\text{mol}$ , 1.0 equiv) and THF (1.5 mL) were used. The crude product was purified by silica-gel column chromatography (gradient of cyclohexane/dichloromethane from 2/1 to 1/2) and washed with methanol. The product was dried under high vacuum to give **9d** (14.1 mg, 10.8  $\mu\text{mol}$ , 18%) as a red-orange solid. m.p. >350 °C.  $^1\text{H}$  NMR (400 MHz,  $\text{CDCl}_3$ , 298 K):  $\delta$  = 8.40 (s, 8H; Ar-H), 7.59–7.64 (m, 2H; Ar-H), 7.52–7.55 (m, 4H; Ar-H), 7.20 (d,  $J$  = 1.9 Hz, 8H; Ar-H), 7.06 (t,  $J$  = 1.9 Hz, 4H; Ar-H), 1.06 ppm (s, 72H; Ar-H).  $^{13}\text{C}$  NMR (101 MHz,  $\text{CDCl}_3$ , 298 K):  $\delta$  = 163.2, 149.9, 142.6, 138.4, 134.6, 132.0, 131.2, 129.7, 129.4, 129.1, 126.4, 123.2, 123.1, 122.8, 120.7, 34.8, 31.4 ppm. UV/Vis ( $\text{CHCl}_3$ ):  $\lambda_{\text{max}}$  ( $\epsilon$ ) = 527 nm ( $91100 \text{ M}^{-1} \text{ cm}^{-1}$ ). fluorescence ( $\text{CHCl}_3$ ):  $\lambda_{\text{em,max}}$  ( $\phi_{\text{f}}$ ) = 534 nm (93±2%). MS (MALDI-TOF, pos. mode, DCTB in chloroform):  $m/z$ : 1294.6 [ $M$ ] $^+$ . HRMS (ESI-TOF, pos. mode, acetonitrile/chloroform 1/1):  $m/z$  calcd for  $\text{C}_{92}\text{H}_{98}\text{N}_2\text{O}_4+\text{Na}^+$ : 1317.7424 [ $M+\text{Na}$ ] $^+$ ; found: 1317.7379.

**3-[2,6-(Diphenyl)phenyl]imino-1*H*,3*H*-Naphtho[1,8-*cd*]pyran-1-one (10a)**

In a Schlenk-tube **1a** (50.0 mg, 204  $\mu\text{mol}$ , 1.0 equiv) was dissolved in THF (1.5 mL) under a nitrogen atmosphere and cooled to –78 °C. Subsequently, LDA (102  $\mu\text{L}$ , 2.0 M in THF/heptane/ethylbenzene, 204  $\mu\text{mol}$ , 1.0 equiv) was added and the reaction mixture was stirred for 1 h at –78 °C. The solution was allowed to warm up to room temperature and **3** (40.4 mg, 204  $\mu\text{mol}$ , 1.0 equiv) was added. The mixture was stirred at 75 °C for 6 h and then cooled to room temperature. The resulting mixture was concentrated under reduced pressure. The crude product was purified by silica-gel column chromatography (gradient of cyclohexane/dichloromethane from 1/1 to 1/3) and washed with cold methanol. The product was dried under high vacuum to give **10a** (10.9 mg, 25.6  $\mu\text{mol}$ , 13%) as a yellow solid. m.p. 249–251 °C.  $^1\text{H}$  NMR (400 MHz,  $\text{CDCl}_3$ , 298 K):  $\delta$  = 8.48 (dd,  $J$  = 1.0 Hz,  $J$  = 7.4 Hz, 1H; Ar-H), 8.30 (dd,  $J$  = 1.2 Hz,  $J$  = 7.4 Hz, 1H; Ar-H), 8.14 (dd,  $J$  = 1.1 Hz,  $J$  = 8.3 Hz, 1H; Ar-H), 8.05 (dd,  $J$  = 1.0 Hz,  $J$  = 8.3 Hz, 1H; Ar-H), 7.61–7.67 (m, 2H; Ar-H), 7.51–7.55 (m, 4H; Ar-H), 7.39–7.42 (m, 2H; Ar-H), 7.30–7.34 (m, 1H; Ar-H), 7.19–7.25 (m, 4H; Ar-H), 7.08–7.13 ppm (m, 2H; Ar-H).  $^{13}\text{C}$  NMR (101 MHz,  $\text{CDCl}_3$ , 298 K):  $\delta$  = 159.4, 146.3, 141.3, 140.6, 134.6, 133.8, 131.8, 131.7, 131.6, 129.7, 129.4, 129.3, 129.0, 127.9, 127.5, 126.7, 126.7, 124.7, 121.4, 118.7 ppm. MS (MALDI-TOF, pos. mode, DCTB in chloroform):  $m/z$ : 425.1 [ $M$ ] $^+$ . HRMS (ESI-TOF, pos. mode, acetonitrile/chloroform 1/1):  $m/z$  calcd for  $\text{C}_{30}\text{H}_{19}\text{NO}_2+\text{H}^+$ : 426.1494 [ $M+\text{H}$ ] $^+$ ; found: 426.1490.

**Conversion of isoimide 10a to imide 6a**

In a Schlenk-tube **10a** (10.0 mg, 23.5  $\mu\text{mol}$ , 1.0 equiv) was dissolved in THF (1.0 mL) under a nitrogen atmosphere and heated to 75 °C. Subsequently, *tert*-BuOK solution (0.24 mL, 0.5 M in water, 118  $\mu\text{mol}$ , 5.0 equiv) was carefully added and heated for 6 h at 75 °C. The reaction mixture was cooled to room temperature and 20 mL dichloromethane and 20 mL water was added. The mixture was extracted with dichloromethane. The combined organic layers were washed with water, dried over  $\text{MgSO}_4$  and concentrated under reduced pressure. The product was dried under high vacuum to give **6a** (9.9 mg, 23.5  $\mu\text{mol}$ , 99%) as a white solid.  $^1\text{H}$  NMR spectrum was in accordance with product identity of one-pot procedure.

## SUPPORTING INFORMATION

## Single crystal X-ray analysis

Crystals suitable for single x-ray diffraction were grown by slow evaporation of concentrated dichloromethane or chloroform solutions or slow diffusion of *n*-hexane or methanol into dichloromethane or chloroform solutions.

**Table S3.** Crystal data and structure refinement for **6a**.

|                                                     |                                                                                                                                               |
|-----------------------------------------------------|-----------------------------------------------------------------------------------------------------------------------------------------------|
| CCDC Number                                         | 1988196                                                                                                                                       |
| Empirical formula                                   | C <sub>30</sub> H <sub>19</sub> NO <sub>2</sub> , 0.237(CH <sub>4</sub> O)                                                                    |
| Formula weight                                      | 433.07                                                                                                                                        |
| Temperature                                         | 100(2) K                                                                                                                                      |
| Wavelength                                          | 1.54178 Å                                                                                                                                     |
| Crystal system, space group                         | Monoclinic, <i>P</i> 2 <sub>1</sub> / <i>n</i>                                                                                                |
| Unit cell dimensions                                | <i>a</i> = 9.4521(3) Å<br><i>b</i> = 27.4078(8) Å<br><i>c</i> = 17.1937(5) Å<br>$\alpha$ = 90 °<br>$\beta$ = 92.3620(10) °<br>$\gamma$ = 90 ° |
| Volume                                              | 4450.4(2) Å <sup>3</sup>                                                                                                                      |
| <i>Z</i>                                            | 8                                                                                                                                             |
| Calculated density                                  | 1.293 Mg/m <sup>3</sup>                                                                                                                       |
| Absorption coefficient                              | 0.644 mm <sup>-1</sup>                                                                                                                        |
| <i>F</i> (000)                                      | 1810                                                                                                                                          |
| Crystal size                                        | 0.520 × 0.490 × 0.470 mm                                                                                                                      |
| Theta range for data collection                     | 3.036 to 72.417 °                                                                                                                             |
| Limiting indices                                    | -11 ≤ <i>h</i> ≤ 11, -32 ≤ <i>k</i> ≤ 33, -21 ≤ <i>l</i> ≤ 21                                                                                 |
| Reflections collected / unique                      | 93592 / 8779 [ <i>R</i> <sub>int</sub> = 0.0271]                                                                                              |
| Completeness                                        | 99.7%                                                                                                                                         |
| Absorption correction                               | Semi-empirical from equivalents                                                                                                               |
| Max. and min. transmission                          | 0.7536 and 0.6771                                                                                                                             |
| Refinement method                                   | Full-matrix least-squares on <i>F</i> <sup>2</sup>                                                                                            |
| Data / restraints / parameters                      | 8779 / 1 / 635                                                                                                                                |
| Goodness-of-fit                                     | 1.037                                                                                                                                         |
| Final <i>R</i> indices [ <i>I</i> > 2σ( <i>I</i> )] | <i>R</i> <sub>1</sub> = 0.0421, <i>wR</i> <sub>2</sub> = 0.1068                                                                               |
| <i>R</i> indices (all data)                         | <i>R</i> <sub>1</sub> = 0.0441, <i>wR</i> <sub>2</sub> = 0.1085                                                                               |
| Largest diff. peak and hole                         | 0.526 and -0.349 e·Å <sup>-3</sup>                                                                                                            |

## SUPPORTING INFORMATION

**Table S4.** Crystal data and structure refinement for **6b**.

|                                      |                                                                                                                                                    |
|--------------------------------------|----------------------------------------------------------------------------------------------------------------------------------------------------|
| CCDC Number                          | 1988190                                                                                                                                            |
| Empirical formula                    | C <sub>34</sub> H <sub>19</sub> NO <sub>2</sub>                                                                                                    |
| Formula weight                       | 473.50                                                                                                                                             |
| Temperature                          | 100(2) K                                                                                                                                           |
| Wavelength                           | 1.54178 Å                                                                                                                                          |
| Crystal system, space group          | Triclinic, $P\bar{1}$                                                                                                                              |
| Unit cell dimensions                 | $a = 9.5047(4)$ Å<br>$b = 11.4030(5)$ Å<br>$c = 13.0745(5)$ Å<br>$\alpha = 113.5620(10)$ °<br>$\beta = 96.4210(10)$ °<br>$\gamma = 106.8600(10)$ ° |
| Volume                               | 1200.43(9) Å <sup>3</sup>                                                                                                                          |
| Z                                    | 2                                                                                                                                                  |
| Calculated density                   | 1.310 Mg/m <sup>3</sup>                                                                                                                            |
| Absorption coefficient               | 0.641 mm <sup>-1</sup>                                                                                                                             |
| $F(000)$                             | 492                                                                                                                                                |
| Crystal size                         | 0.580 × 0.520 × 0.520 mm                                                                                                                           |
| Theta range for data collection      | 3.819 to 72.165 °                                                                                                                                  |
| Limiting indices                     | -11 ≤ $h$ ≤ 11, -14 ≤ $k$ ≤ 14, -16 ≤ $l$ ≤ 16                                                                                                     |
| Reflections collected / unique       | 20993 / 4697 [ $R_{\text{int}} = 0.0352$ ]                                                                                                         |
| Completeness                         | 99.7%                                                                                                                                              |
| Absorption correction                | Semi-empirical from equivalents                                                                                                                    |
| Max. and min. transmission           | 0.7536 and 0.5996                                                                                                                                  |
| Refinement method                    | Full-matrix least-squares on $F^2$                                                                                                                 |
| Data / restraints / parameters       | 4697 / 0 / 335                                                                                                                                     |
| Goodness-of-fit on $F^2$             | 1.078                                                                                                                                              |
| Final R indices [ $I > 2\sigma(I)$ ] | $R_1 = 0.0384$ , $wR_2 = 0.0959$                                                                                                                   |
| R indices (all data)                 | $R_1 = 0.0417$ , $wR_2 = 0.0983$                                                                                                                   |
| Largest diff. peak and hole          | 0.270 and -0.296 e·Å <sup>-3</sup>                                                                                                                 |

## SUPPORTING INFORMATION

**Table S5.** Crystal data and structure refinement for **6c**.

|                                        |                                                                                                                                   |
|----------------------------------------|-----------------------------------------------------------------------------------------------------------------------------------|
| CCDC Number                            | 1988198                                                                                                                           |
| Empirical formula                      | C <sub>38</sub> H <sub>35</sub> NO <sub>2</sub> , 0.276(C <sub>6</sub> H <sub>14</sub> )                                          |
| Formula weight                         | 561.44                                                                                                                            |
| Temperature                            | 100(2) K                                                                                                                          |
| Wavelength                             | 1.54178 Å                                                                                                                         |
| Crystal system, space group            | Trigonal, $R\bar{3}$                                                                                                              |
| Unit cell dimensions                   | $a = 42.7740(12)$ Å<br>$b = 42.774(3)$ Å<br>$c = 9.467(5)$ Å<br>$\alpha = 90^\circ$<br>$\beta = 90^\circ$<br>$\gamma = 120^\circ$ |
| Volume                                 | 15000(8) Å <sup>3</sup>                                                                                                           |
| Z                                      | 18                                                                                                                                |
| Calculated density                     | 1.119 Mg/m <sup>3</sup>                                                                                                           |
| Absorption coefficient                 | 0.525 mm <sup>-1</sup>                                                                                                            |
| $F(000)$                               | 5396                                                                                                                              |
| Crystal size                           | 0.391 × 0.244 × 0.236 mm                                                                                                          |
| Theta range for data collection        | 3.579 to 72.359 °                                                                                                                 |
| Limiting indices                       | -52 ≤ $h$ ≤ 50, -52 ≤ $k$ ≤ 52, -11 ≤ $l$ ≤ 11                                                                                    |
| Reflections collected / unique         | 128131 / 6597 [ $R_{int} = 0.0492$ ]                                                                                              |
| Completeness                           | 100.0%                                                                                                                            |
| Absorption correction                  | Semi-empirical from equivalents                                                                                                   |
| Max. and min. transmission             | 0.7536 and 0.6340                                                                                                                 |
| Refinement method                      | Full-matrix least-squares on $F^2$                                                                                                |
| Data / restraints / parameters         | 6597 / 0 / 384                                                                                                                    |
| Goodness-of-fit                        | 1.057                                                                                                                             |
| Final $R$ indices [ $I > 2\sigma(I)$ ] | $R_1 = 0.0644$ , $wR_2 = 0.1700$                                                                                                  |
| $R$ indices (all data)                 | $R_1 = 0.0669$ , $wR_2 = 0.1722$                                                                                                  |
| Largest diff. peak and hole            | 0.704 and -0.357 e·Å <sup>-3</sup>                                                                                                |

## SUPPORTING INFORMATION

**Table S6.** Crystal data and structure refinement for **6d**.

|                                                     |                                                                                                                                                |
|-----------------------------------------------------|------------------------------------------------------------------------------------------------------------------------------------------------|
| CCDC Number                                         | 1988197                                                                                                                                        |
| Empirical formula                                   | C <sub>46</sub> H <sub>51</sub> NO <sub>2</sub>                                                                                                |
| Formula weight                                      | 649.88                                                                                                                                         |
| Temperature                                         | 100(2) K                                                                                                                                       |
| Wavelength                                          | 1.54178 Å                                                                                                                                      |
| Crystal system, space group                         | Monoclinic, <i>P2<sub>1</sub>/n</i>                                                                                                            |
| Unit cell dimensions                                | <i>a</i> = 9.3190(6) Å<br><i>b</i> = 23.5604(14) Å<br><i>c</i> = 17.6446(11) Å<br><i>a</i> = 90 °<br><i>β</i> = 97.518(3) °<br><i>γ</i> = 90 ° |
| Volume                                              | 3840.7(4) Å <sup>3</sup>                                                                                                                       |
| <i>Z</i>                                            | 4                                                                                                                                              |
| Calculated density                                  | 1.124 Mg/m <sup>3</sup>                                                                                                                        |
| Absorption coefficient                              | 0.516 mm <sup>-1</sup>                                                                                                                         |
| <i>F</i> (000)                                      | 1400                                                                                                                                           |
| Crystal size                                        | 0.226 × 0.110 × 0.078 mm                                                                                                                       |
| Theta range for data collection                     | 3.146 to 72.674 °                                                                                                                              |
| Limiting indices                                    | -11 ≤ <i>h</i> ≤ 11, -29 ≤ <i>k</i> ≤ 29, -21 ≤ <i>l</i> ≤ 21                                                                                  |
| Reflections collected / unique                      | 69915 / 7613 [ <i>R</i> <sub>int</sub> = 0.0565]                                                                                               |
| Completeness                                        | 100.0%                                                                                                                                         |
| Absorption correction                               | Semi-empirical from equivalents                                                                                                                |
| Max. and min. transmission                          | 0.7536 and 0.6670                                                                                                                              |
| Refinement method                                   | Full-matrix least-squares on <i>F</i> <sup>2</sup>                                                                                             |
| Data / restraints / parameters                      | 7613 / 0 / 454                                                                                                                                 |
| Goodness-of-fit                                     | 1.036                                                                                                                                          |
| Final <i>R</i> indices [ <i>I</i> > 2σ( <i>I</i> )] | <i>R</i> <sub>1</sub> = 0.0498, <i>wR</i> <sub>2</sub> = 0.1250                                                                                |
| <i>R</i> indices (all data)                         | <i>R</i> <sub>1</sub> = 0.0581, <i>wR</i> <sub>2</sub> = 0.1317                                                                                |
| Largest diff. peak and hole                         | 0.599 and -0.284 e·Å <sup>-3</sup>                                                                                                             |

## SUPPORTING INFORMATION

Table S7. Crystal data and structure refinement for **8a**.

|                                                     |                                                                                                                                                |
|-----------------------------------------------------|------------------------------------------------------------------------------------------------------------------------------------------------|
| CCDC Number                                         | 1988191                                                                                                                                        |
| Empirical formula                                   | C <sub>40</sub> H <sub>23</sub> NO <sub>2</sub>                                                                                                |
| Formula weight                                      | 549.59                                                                                                                                         |
| Temperature                                         | 100(2) K                                                                                                                                       |
| Wavelength                                          | 1.54178 Å                                                                                                                                      |
| Crystal system, space group                         | Monoclinic, <i>P</i> 2 <sub>1</sub> / <i>n</i>                                                                                                 |
| Unit cell dimensions                                | <i>a</i> = 8.2649(8) Å<br><i>b</i> = 18.9881(18) Å<br><i>c</i> = 16.9669(16) Å<br><i>a</i> = 90 °<br><i>β</i> = 94.814(4) °<br><i>γ</i> = 90 ° |
| Volume                                              | 2653.3(4) Å <sup>3</sup>                                                                                                                       |
| <i>Z</i>                                            | 4                                                                                                                                              |
| Calculated density                                  | 1.376 Mg/m <sup>3</sup>                                                                                                                        |
| Absorption coefficient                              | 0.662 mm <sup>-1</sup>                                                                                                                         |
| <i>F</i> (000)                                      | 1144                                                                                                                                           |
| Crystal size                                        | 0.691 × 0.328 × 0.248 mm                                                                                                                       |
| Theta range for data collection                     | 3.500 to 72.820 °                                                                                                                              |
| Limiting indices                                    | -10 ≤ <i>h</i> ≤ 10, -19 ≤ <i>k</i> ≤ 23, -20 ≤ <i>l</i> ≤ 20                                                                                  |
| Reflections collected / unique                      | 46803 / 5254 [ <i>R</i> <sub>int</sub> = 0.0530]                                                                                               |
| Completeness                                        | 100.0%                                                                                                                                         |
| Absorption correction                               | Semi-empirical from equivalents                                                                                                                |
| Max. and min. transmission                          | 0.7536 and 0.6546                                                                                                                              |
| Refinement method                                   | Full-matrix least-squares on <i>F</i> <sup>2</sup>                                                                                             |
| Data / restraints / parameters                      | 5254 / 0 / 388                                                                                                                                 |
| Goodness-of-fit                                     | 1.050                                                                                                                                          |
| Final <i>R</i> indices [ <i>I</i> > 2σ( <i>I</i> )] | <i>R</i> <sub>1</sub> = 0.0382, <i>wR</i> <sub>2</sub> = 0.0953                                                                                |
| <i>R</i> indices (all data)                         | <i>R</i> <sub>1</sub> = 0.0453, <i>wR</i> <sub>2</sub> = 0.1005                                                                                |
| Largest diff. peak and hole                         | 0.199 and -0.252 e·Å <sup>-3</sup>                                                                                                             |

## SUPPORTING INFORMATION

**Table S8.** Crystal data and structure refinement for **8d**.

|                                                     |                                                                                                                                                 |
|-----------------------------------------------------|-------------------------------------------------------------------------------------------------------------------------------------------------|
| CCDC Number                                         | 1988194                                                                                                                                         |
| Empirical formula                                   | C <sub>56</sub> H <sub>55</sub> NO <sub>2</sub> , 2(CHCl <sub>3</sub> )                                                                         |
| Formula weight                                      | 1012.74                                                                                                                                         |
| Temperature                                         | 100(2) K                                                                                                                                        |
| Wavelength                                          | 1.54178 Å                                                                                                                                       |
| Crystal system, space group                         | Monoclinic, <i>P</i> 2 <sub>1</sub> / <i>c</i>                                                                                                  |
| Unit cell dimensions                                | <i>a</i> = 12.3323(3) Å<br><i>b</i> = 16.5743(4) Å<br><i>c</i> = 25.3982(6) Å<br><i>a</i> = 90 °<br><i>β</i> = 92.2790(10) °<br><i>γ</i> = 90 ° |
| Volume                                              | 5187.3(2) Å <sup>3</sup>                                                                                                                        |
| <i>Z</i>                                            | 4                                                                                                                                               |
| Calculated density                                  | 1.297 Mg/m <sup>3</sup>                                                                                                                         |
| Absorption coefficient                              | 3.352 mm <sup>-1</sup>                                                                                                                          |
| <i>F</i> (000)                                      | 2120                                                                                                                                            |
| Crystal size                                        | 0.485 × 0.358 × 0.142 mm                                                                                                                        |
| Theta range for data collection                     | 3.185 to 72.222 °                                                                                                                               |
| Limiting indices                                    | -15 ≤ <i>h</i> ≤ 15, -19 ≤ <i>k</i> ≤ 20, -31 ≤ <i>l</i> ≤ 31                                                                                   |
| Reflections collected / unique                      | 69426 / 10235 [ <i>R</i> <sub>int</sub> = 0.0438]                                                                                               |
| Completeness                                        | 100.0%                                                                                                                                          |
| Absorption correction                               | Semi-empirical from equivalents                                                                                                                 |
| Max. and min. transmission                          | 0.7536 and 0.4999                                                                                                                               |
| Refinement method                                   | Full-matrix least-squares on <i>F</i> <sup>2</sup>                                                                                              |
| Data / restraints / parameters                      | 10235 / 24 / 673                                                                                                                                |
| Goodness-of-fit                                     | 1.027                                                                                                                                           |
| Final <i>R</i> indices [ <i>I</i> > 2σ( <i>I</i> )] | <i>R</i> <sub>1</sub> = 0.0499, <i>wR</i> <sub>2</sub> = 0.1324                                                                                 |
| <i>R</i> indices (all data)                         | <i>R</i> <sub>1</sub> = 0.0574, <i>wR</i> <sub>2</sub> = 0.1378                                                                                 |
| Largest diff. peak and hole                         | 0.530 and -0.889 e·Å <sup>-3</sup>                                                                                                              |



## SUPPORTING INFORMATION

**Table S9.** Crystal data and structure refinement for **9b**.

|                                        |                                                                                                                                                              |
|----------------------------------------|--------------------------------------------------------------------------------------------------------------------------------------------------------------|
| CCDC Number                            | 1988192                                                                                                                                                      |
| Empirical formula                      | $C_{68}H_{34}N_2O_4 \cdot 2(C_7H_8)$                                                                                                                         |
| Formula weight                         | 1127.24                                                                                                                                                      |
| Temperature                            | 173(2) K                                                                                                                                                     |
| Wavelength                             | 1.54178 Å                                                                                                                                                    |
| Crystal system, space group            | Triclinic, $P\bar{1}$                                                                                                                                        |
| Unit cell dimensions                   | $a = 9.8083(3)$ Å<br>$b = 10.9966(3)$ Å<br>$c = 13.7096(4)$ Å<br>$\alpha = 95.4630(10)^\circ$<br>$\beta = 96.3940(10)^\circ$<br>$\gamma = 91.7980(10)^\circ$ |
| Volume                                 | 1461.50(7) Å <sup>3</sup>                                                                                                                                    |
| Z                                      | 1                                                                                                                                                            |
| Calculated density                     | 1.281 Mg/m <sup>3</sup>                                                                                                                                      |
| Absorption coefficient                 | 0.614 mm <sup>-1</sup>                                                                                                                                       |
| $F(000)$                               | 588                                                                                                                                                          |
| Crystal size                           | 0.271 × 0.133 × 0.068 mm                                                                                                                                     |
| Theta range for data collection        | 3.260 to 72.215 °                                                                                                                                            |
| Limiting indices                       | -12 ≤ $h$ ≤ 12, -13 ≤ $k$ ≤ 12, -16 ≤ $l$ ≤ 16                                                                                                               |
| Reflections collected / unique         | 28837 / 5734 [ $R_{int} = 0.0448$ ]                                                                                                                          |
| Completeness                           | 99.8%                                                                                                                                                        |
| Absorption correction                  | Semi-empirical from equivalents                                                                                                                              |
| Max. and min. transmission             | 0.7536 and 0.6827                                                                                                                                            |
| Refinement method                      | Full-matrix least-squares on $F^2$                                                                                                                           |
| Data / restraints / parameters         | 5734 / 1 / 393                                                                                                                                               |
| Goodness-of-fit                        | 1.031                                                                                                                                                        |
| Final $R$ indices [ $I > 2\sigma(I)$ ] | $R_1 = 0.0401$ , $wR_2 = 0.1064$                                                                                                                             |
| $R$ indices (all data)                 | $R_1 = 0.0495$ , $wR_2 = 0.1130$                                                                                                                             |
| Largest diff. peak and hole            | 0.186 and -0.208 e·Å <sup>-3</sup>                                                                                                                           |

## SUPPORTING INFORMATION

Table S10. Crystal data and structure refinement for **9d**.

|                                        |                                                                                                                                                           |
|----------------------------------------|-----------------------------------------------------------------------------------------------------------------------------------------------------------|
| CCDC Number                            | 1988195                                                                                                                                                   |
| Empirical formula                      | C <sub>92</sub> H <sub>98</sub> N <sub>2</sub> O <sub>4</sub> , (CH <sub>2</sub> Cl <sub>2</sub> ) (CH <sub>4</sub> O)                                    |
| Formula weight                         | 1412.69                                                                                                                                                   |
| Temperature                            | 100(2) K                                                                                                                                                  |
| Wavelength                             | 1.54178 Å                                                                                                                                                 |
| Crystal system, space group            | Triclinic, $P\bar{1}$                                                                                                                                     |
| Unit cell dimensions                   | $a = 16.5016(7)$ Å<br>$b = 17.4206(8)$ Å<br>$c = 17.6995(9)$ Å<br>$\alpha = 99.922(3)^\circ$<br>$\beta = 112.305(3)^\circ$<br>$\gamma = 112.149(2)^\circ$ |
| Volume                                 | 4053.9(3) Å <sup>3</sup>                                                                                                                                  |
| Z                                      | 2                                                                                                                                                         |
| Calculated density                     | 1.157 Mg/m <sup>3</sup>                                                                                                                                   |
| Absorption coefficient                 | 1.128 mm <sup>-1</sup>                                                                                                                                    |
| $F(000)$                               | 1512                                                                                                                                                      |
| Crystal size                           | 0.122 × 0.074 × 0.059 mm                                                                                                                                  |
| Theta range for data collection        | 2.902 to 72.314 °                                                                                                                                         |
| Limiting indices                       | -20 ≤ $h$ ≤ 20, -21 ≤ $k$ ≤ 21, -17 ≤ $l$ ≤ 21                                                                                                            |
| Reflections collected / unique         | 80522 / 15965 [ $R_{\text{int}} = 0.0475$ ]                                                                                                               |
| Completeness                           | 99.9%                                                                                                                                                     |
| Absorption correction                  | Semi-empirical from equivalents                                                                                                                           |
| Max. and min. transmission             | 0.7536 and 0.5884                                                                                                                                         |
| Refinement method                      | Full-matrix least-squares on $F^2$                                                                                                                        |
| Data / restraints / parameters         | 15965 / 1 / 975                                                                                                                                           |
| Goodness-of-fit                        | 1.027                                                                                                                                                     |
| Final $R$ indices [ $I > 2\sigma(I)$ ] | $R_1 = 0.0695$ , $wR_2 = 0.1940$                                                                                                                          |
| $R$ indices (all data)                 | $R_1 = 0.0855$ , $wR_2 = 0.2117$                                                                                                                          |
| Largest diff. peak and hole            | 0.922 and -1.101 e·Å <sup>-3</sup>                                                                                                                        |

## SUPPORTING INFORMATION

**Table S11.** Crystal data and structure refinement for **10a**.

|                                        |                                                                                                                            |
|----------------------------------------|----------------------------------------------------------------------------------------------------------------------------|
| CCDC Number                            | 1988193                                                                                                                    |
| Empirical formula                      | C <sub>30</sub> H <sub>19</sub> NO <sub>2</sub>                                                                            |
| Formula weight                         | 425.46                                                                                                                     |
| Temperature                            | 100(2) K                                                                                                                   |
| Wavelength                             | 1.54178 Å                                                                                                                  |
| Crystal system, space group            | Orthorhombic, <i>Pbca</i>                                                                                                  |
| Unit cell dimensions                   | $a = 7.5150(7)$ Å<br>$b = 18.211(2)$ Å<br>$c = 31.154(3)$ Å<br>$a = 90^\circ$<br>$\beta = 90^\circ$<br>$\gamma = 90^\circ$ |
| Volume                                 | 4263.5(7) Å <sup>3</sup>                                                                                                   |
| Z                                      | 8                                                                                                                          |
| Calculated density                     | 1.326 Mg/m <sup>3</sup>                                                                                                    |
| Absorption coefficient                 | 0.655 mm <sup>-1</sup>                                                                                                     |
| $F(000)$                               | 1776                                                                                                                       |
| Crystal size                           | 0.202 × 0.088 × 0.024 mm                                                                                                   |
| Theta range for data collection        | 2.837 to 72.481 °                                                                                                          |
| Limiting indices                       | $-8 \leq h \leq 9$ , $-22 \leq k \leq 22$ , $-37 \leq l \leq 26$                                                           |
| Reflections collected / unique         | 26331 / 4217 [ $R_{\text{int}} = 0.0628$ ]                                                                                 |
| Completeness                           | 99.9%                                                                                                                      |
| Absorption correction                  | Semi-empirical from equivalents                                                                                            |
| Max. and min. transmission             | 0.7536 and 0.6494                                                                                                          |
| Refinement method                      | Full-matrix least-squares on $F^2$                                                                                         |
| Data / restraints / parameters         | 4217 / 0 / 298                                                                                                             |
| Goodness-of-fit                        | 1.031                                                                                                                      |
| Final $R$ indices [ $I > 2\sigma(I)$ ] | $R_1 = 0.0437$ , $wR_2 = 0.1059$                                                                                           |
| $R$ indices (all data)                 | $R_1 = 0.0585$ , $wR_2 = 0.1164$                                                                                           |
| Largest diff. peak and hole            | 0.186 and $-0.205$ e·Å <sup>-3</sup>                                                                                       |

## SUPPORTING INFORMATION

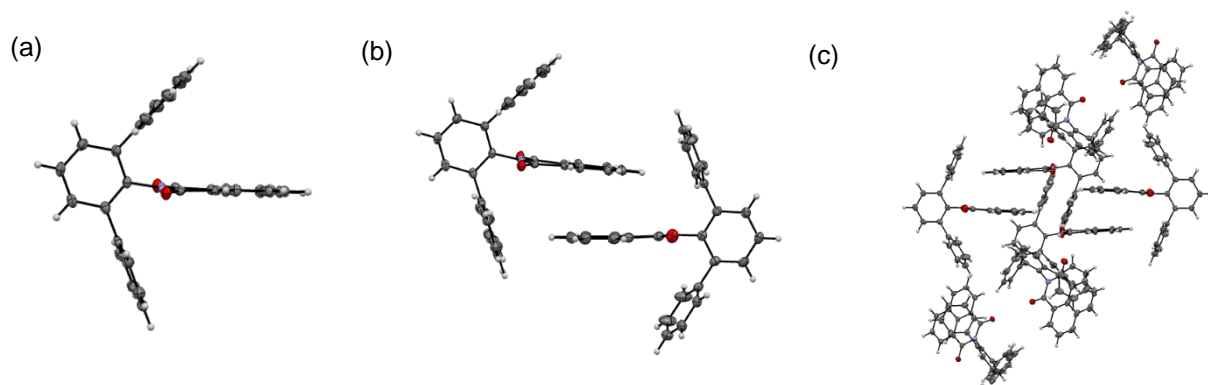

**Figure S1.** Molecular structure of **6a** in the solid-state. (a) Side view on the imide substituent, (b) dimeric fashion motif and (c) packing arrangement in the solid-state (methanol molecules were omitted for clarity).

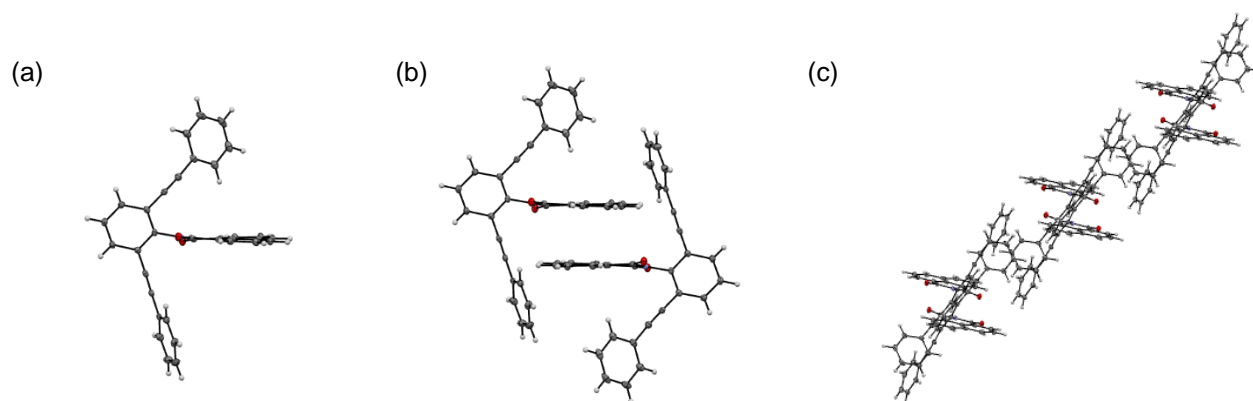

**Figure S2.** Molecular structure of **6b** in the solid-state. (a) Side view on the imide substituent, (b) dimeric fashion motif and (c) packing arrangement in the solid-state.

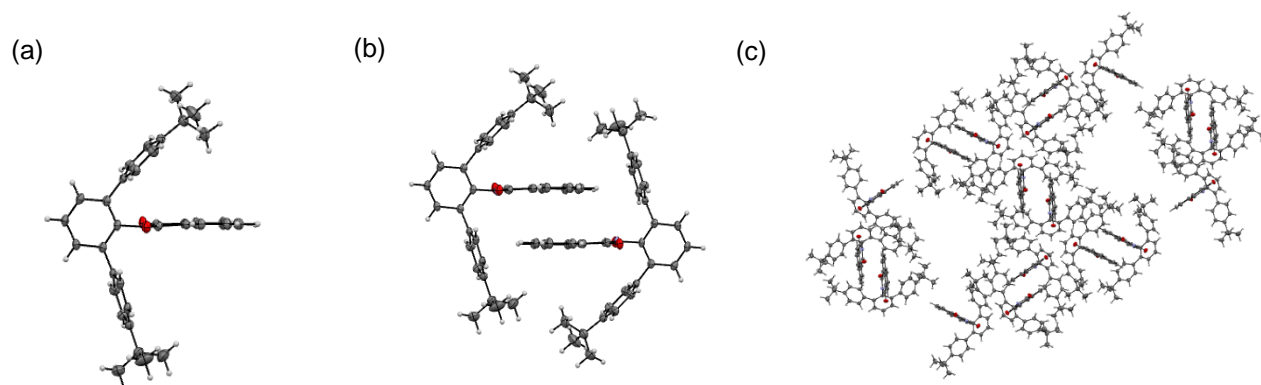

**Figure S3.** Molecular structure of **6c** in the solid-state. (a) Side view on the imide substituent, (b) dimeric fashion motif and (c) packing arrangement in the solid-state (*n*-hexane molecules were omitted for clarity).

## SUPPORTING INFORMATION

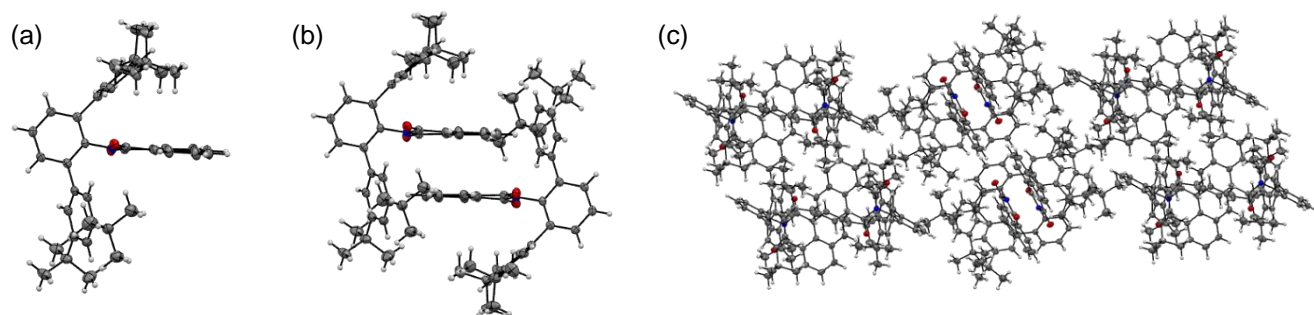

**Figure S4.** Molecular structure of **6d** in the solid-state. (a) Side view on the imide substituent, (b) dimeric fashion motif and (c) packing arrangement in the solid-state.

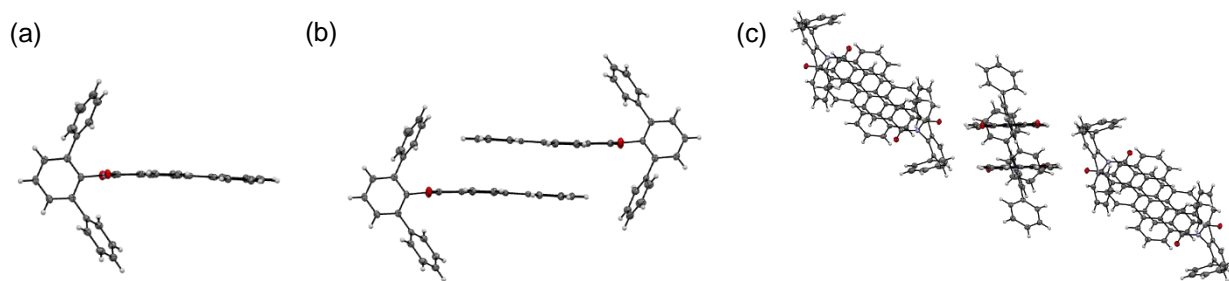

**Figure S5.** Molecular structure of **8a** in the solid-state. (a) Side view on the imide substituent, (b) dimeric fashion motif and (c) packing arrangement in the solid-state.

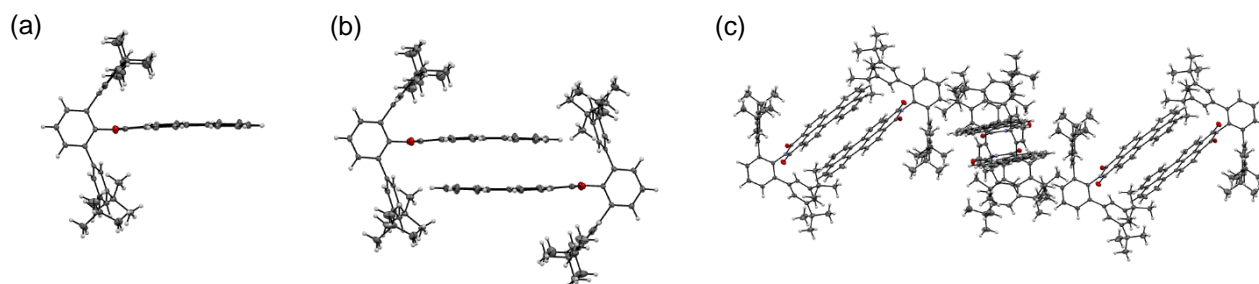

**Figure S6.** Molecular structure of **8d** in the solid-state. (a) Side view on the imide substituent, (b) dimeric fashion motif and (c) packing arrangement in the solid-state (chloroform molecules were omitted for clarity).

## SUPPORTING INFORMATION

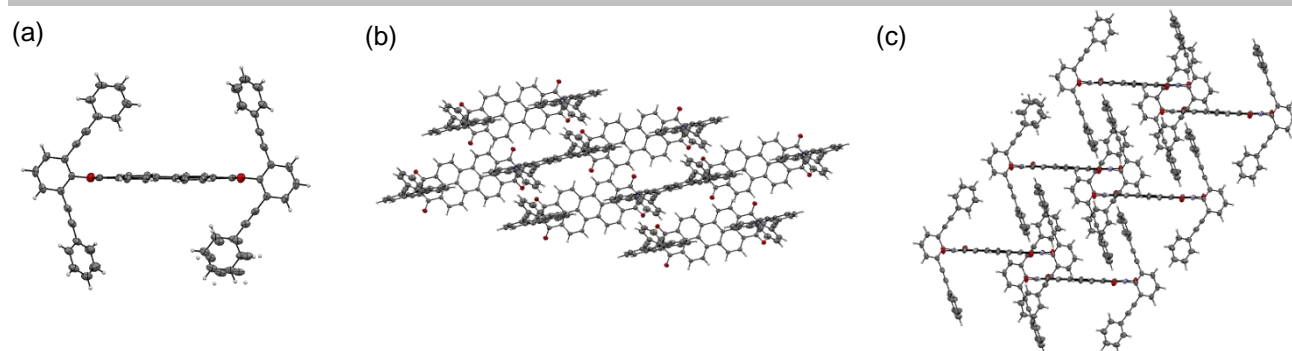

**Figure S7.** Molecular structure of **9b** in the solid-state. (a) Side view on the imide substituent, (b) and (c) packing arrangement in the solid-state (toluene molecules were omitted for clarity).

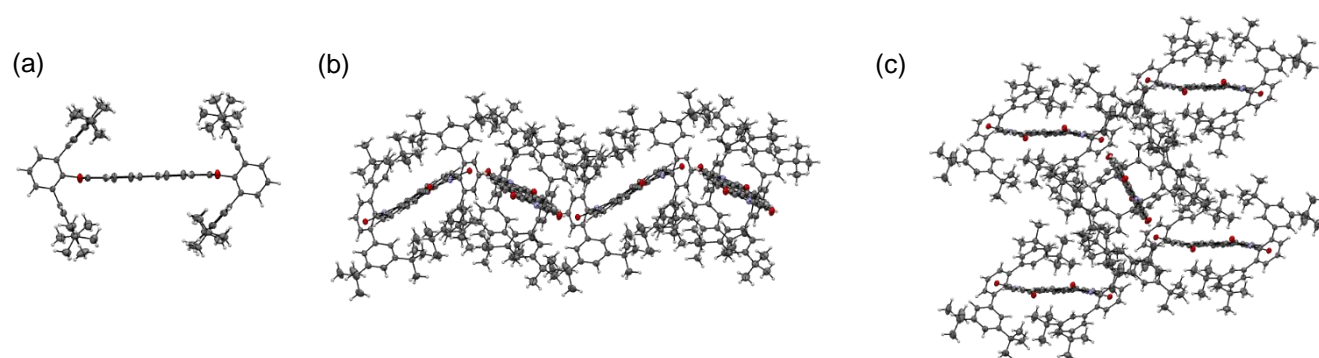

**Figure S8.** Molecular structure of **9d** in the solid-state. (a) Side view on the imide substituent, (b) and (c) packing arrangement in the solid-state (dichloromethane and methanol molecules were omitted for clarity).

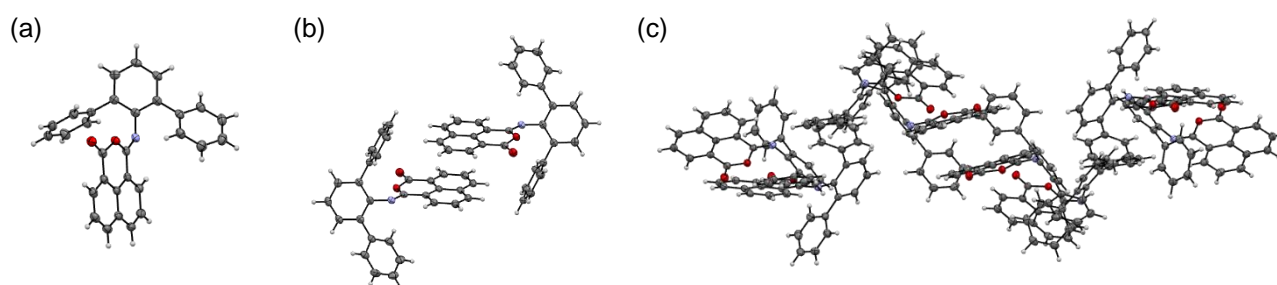

**Figure S9.** Molecular structure of **10a** in the solid-state. (a) Side view, (b) dimeric fashion motif and (c) packing arrangement in the solid-state.

## SUPPORTING INFORMATION

## Optical properties in solution

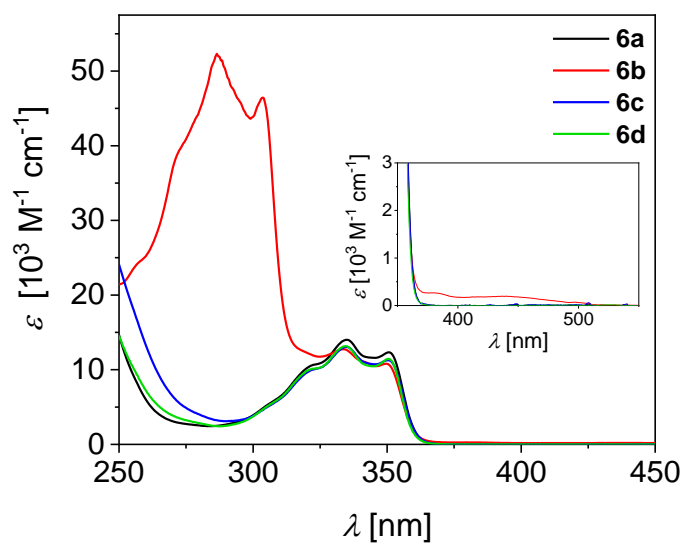

**Figure S10.** UV/Vis spectra of **6a–d** in chloroform solutions at room temperature ( $c \sim 10^{-5}$  M). Inset: Magnified region between 350–550 nm.

**Table S11.** UV/Vis absorption properties of naphthalene monoimides **6a–d** in chloroform solutions at room temperature.

|           | $\lambda_{\text{abs}}$ [nm] ( $\epsilon$ [ $\text{M}^{-1} \text{ cm}^{-1}$ ]) |
|-----------|-------------------------------------------------------------------------------|
| <b>6a</b> | 351 (12300)                                                                   |
| <b>6b</b> | 350 (10800)                                                                   |
| <b>6c</b> | 351 (11300)                                                                   |
| <b>6d</b> | 351 (11400)                                                                   |

## SUPPORTING INFORMATION

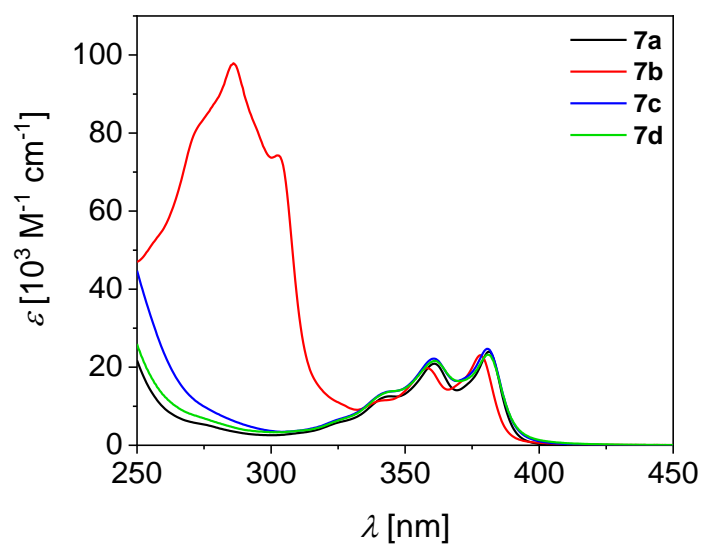

**Figure S11.** UV/Vis spectra of **7a–d** in chloroform solutions at room temperature ( $c \sim 10^{-5}$  M).

**Table S12.** UV/Vis absorption properties of naphthalene bisimides **7a–d** in chloroform solutions at room temperature.

|           | $\lambda_{\text{abs}}$ [nm] ( $\epsilon$ [ $\text{M}^{-1} \text{ cm}^{-1}$ ]) |
|-----------|-------------------------------------------------------------------------------|
| <b>7a</b> | 381 (24000)                                                                   |
| <b>7b</b> | 378 (23100)                                                                   |
| <b>7c</b> | 381 (24700)                                                                   |
| <b>7d</b> | 381 (23200)                                                                   |



## SUPPORTING INFORMATION

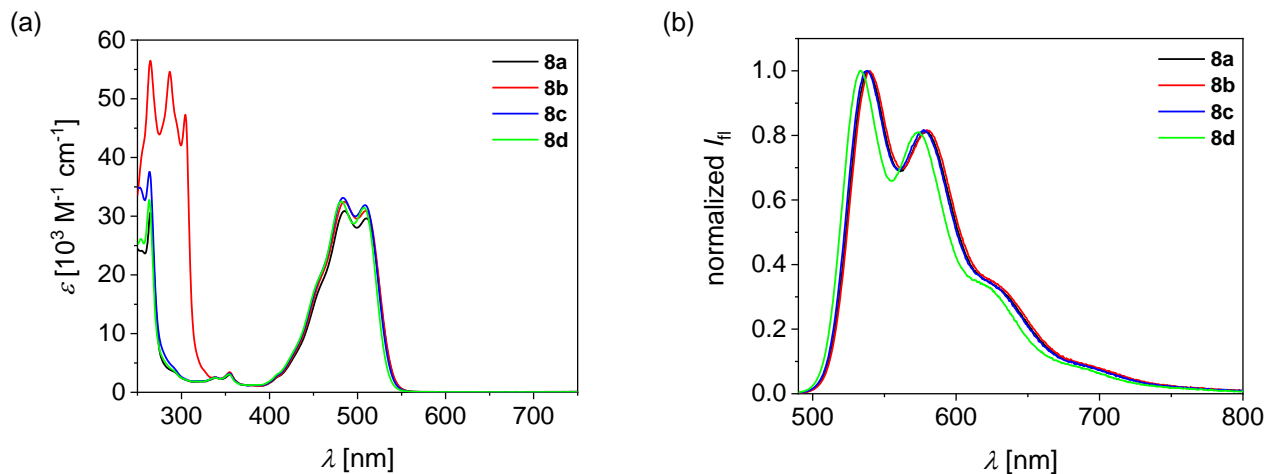

**Figure S12.** (a) UV/Vis and (b) fluorescence spectra and fluorescence of **8a–d** in chloroform solutions at room temperature ( $c \sim 10^{-6}$ – $10^{-7}$ M).

**Table S13.** Optical properties of perylene monoimides **8a–d** in chloroform solutions at room temperature.

|           | $\lambda_{\text{abs}}$ [nm] ( $\epsilon$ [ $\text{M}^{-1} \text{cm}^{-1}$ ]) | $\lambda_{\text{em}}$ [nm] | Stokes shift [ $\text{cm}^{-1}$ ] | $\Phi_f$ [%] <sup>[a]</sup> | $\tau$ [ns] <sup>[b]</sup> |
|-----------|------------------------------------------------------------------------------|----------------------------|-----------------------------------|-----------------------------|----------------------------|
| <b>8a</b> | 510 (29600)                                                                  | 538                        | 1020                              | $87 \pm 4$                  | 5.0                        |
| <b>8b</b> | 510 (30900)                                                                  | 540                        | 1090                              | $86 \pm 4$                  | 5.2                        |
| <b>8c</b> | 509 (31900)                                                                  | 539                        | 1090                              | $84 \pm 4$                  | 5.0                        |
| <b>8d</b> | 508 (31500)                                                                  | 534                        | 960                               | $84 \pm 4$                  | 4.8                        |

[a] Fluorescence quantum yields were determined using the relative method ( $A < 0.05$ ) and *N,N*-bis(2,6-diisopropylphenyl)perylene-3,4:9,10-bis(dicarboximide) ( $\Phi_f$  ( $\text{CHCl}_3$ ) = 1.00) as reference. [b] excitation wavelength:  $\lambda_{\text{ex}} = 506$  nm; detection wavelength:  $\lambda_{\text{det}} = 537$  nm.

## SUPPORTING INFORMATION

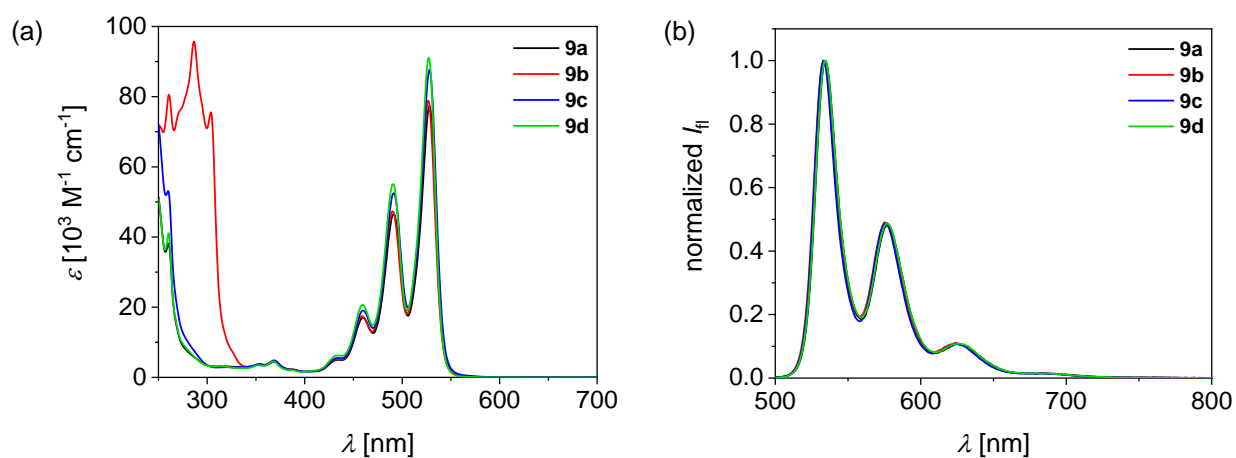

**Figure S13.** (a) UV/Vis and (b) fluorescence spectra of **9a–d** in chloroform solutions at room temperature ( $c \sim 10^{-6}$ – $10^{-7}$ M).

**Table S14.** Optical properties of perylene bisimides **9a–d** in chloroform solutions at room temperature.

|           | $\lambda_{\text{abs}}$ [nm] ( $\epsilon$ [ $\text{M}^{-1} \text{cm}^{-1}$ ]) | $\lambda_{\text{em}}$ [nm] | Stokes shift [ $\text{cm}^{-1}$ ] | $\Phi_f$ [%] <sup>[a]</sup> | $\tau$ [ns] <sup>[b]</sup> |
|-----------|------------------------------------------------------------------------------|----------------------------|-----------------------------------|-----------------------------|----------------------------|
| <b>9a</b> | 528 (77400)                                                                  | 535                        | 250                               | $95 \pm 2$                  | 3.8                        |
| <b>9b</b> | 527 (78800)                                                                  | 534                        | 250                               | $96 \pm 1$                  | 3.7                        |
| <b>9c</b> | 528 (87700)                                                                  | 533                        | 180                               | $97 \pm 1$                  | 3.8                        |
| <b>9d</b> | 527 (91100)                                                                  | 534                        | 250                               | $93 \pm 2$                  | 3.8                        |

[a] Fluorescence quantum yields were determined using the relative method ( $A < 0.05$ ) and *N,N*-bis(2,6-diisopropylphenyl)perylene-3,4:9,10-bis(dicarboximide) ( $\Phi_f$  ( $\text{CHCl}_3$ ) = 1.00) as reference. [b] excitation wavelength:  $\lambda_{\text{ex}} = 506$  nm; detection wavelength:  $\lambda_{\text{det}} = 537$  nm.

## SUPPORTING INFORMATION

## Optical properties in the solid-state

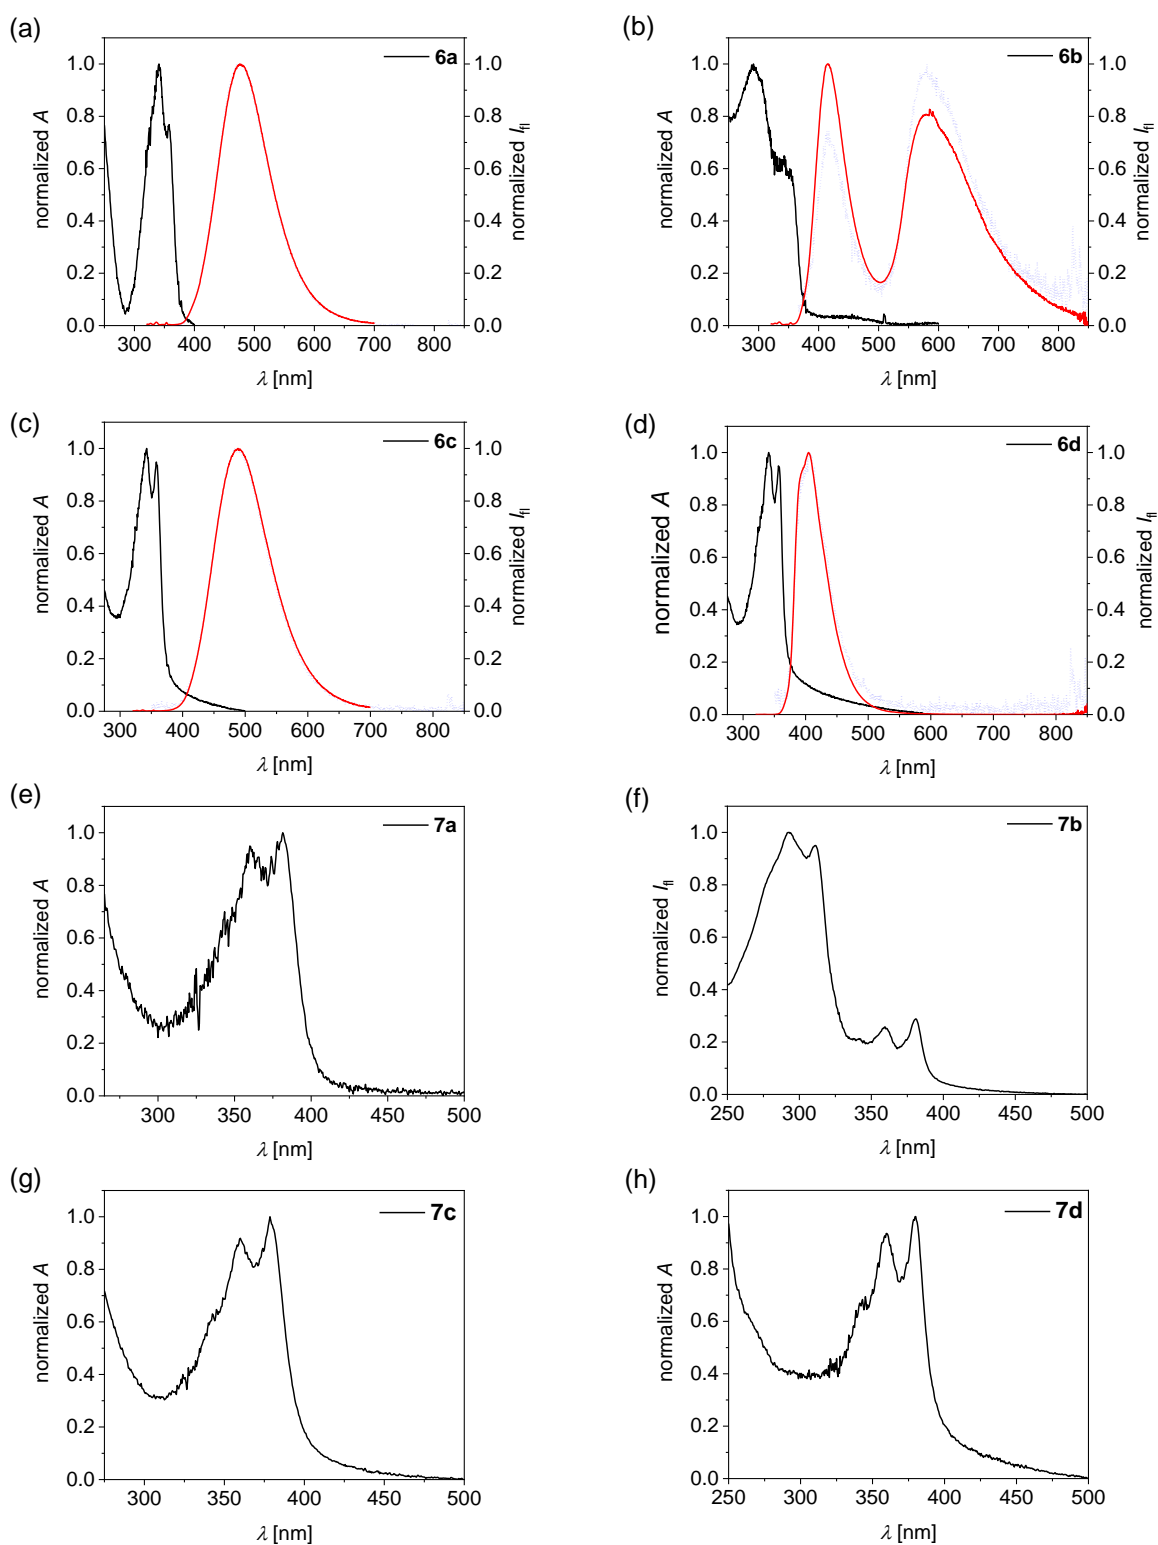

**Figure S14.** UV/Vis absorption (black solid line; spin-coated films) and fluorescence (dotted lines, red: measurement with front face setup ( $\lambda_{ex} = 320$  nm), blue: measurement with integrations sphere ( $\lambda_{ex} = 325$  nm); powder samples) spectra of (a) **6a**, (b) **6b**, (c) **6c**, (d) **6d**, (e) **7a**, (f) **7b**, (g) **7c** and (h) **7d** (no fluorescence spectra for non-emissive compounds **7a-d**).

## SUPPORTING INFORMATION

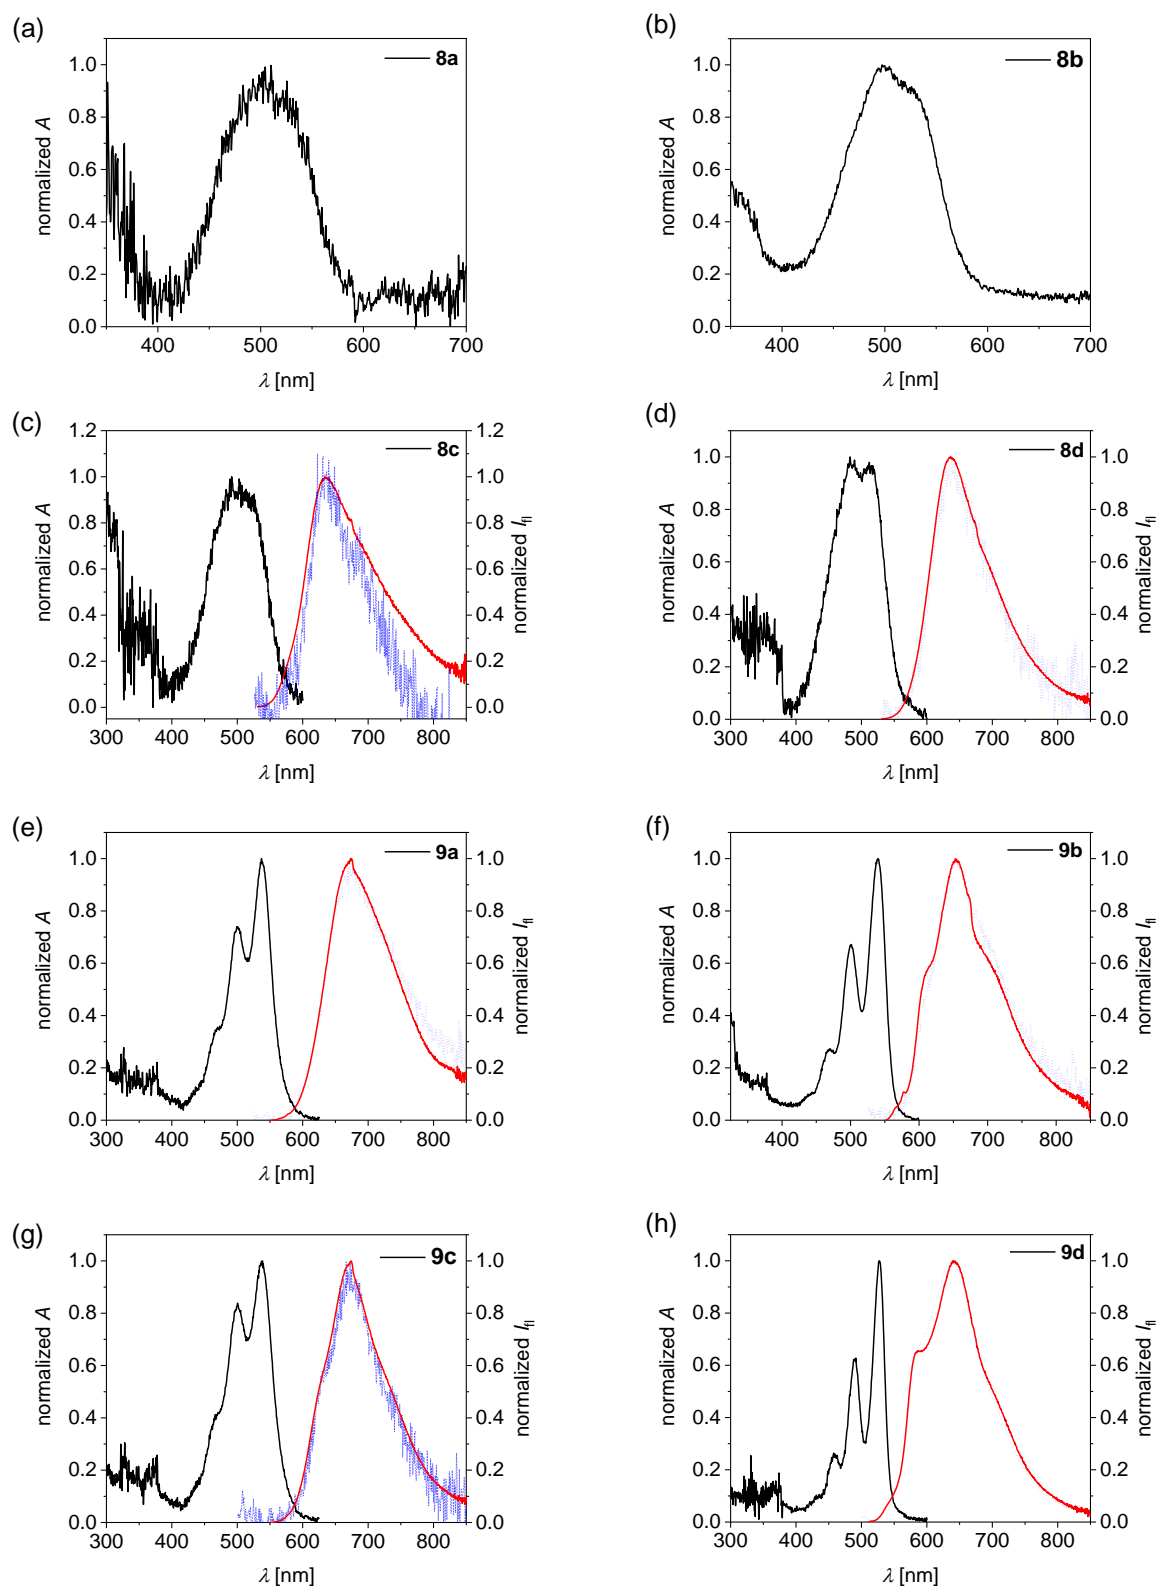

**Figure S15.** UV/Vis absorption (black solid line; spin-coated films) and fluorescence (red solid lines: measurement in front face setup (**8**:  $\lambda_{\text{ex}} = 470$  nm, **9**:  $\lambda_{\text{ex}} = 490$  nm), blue dotted lines: measurement with integrations sphere ( $\lambda_{\text{ex}} = 490$  nm); powder samples) spectra of (a) **8a**, (b) **8b**, (c) **8c**, (d) **8d**, (e) **9a**, (f) **9b**, (g) **9c** and (h) **9d** (no fluorescence spectra for non-emissive compounds **8a–b**).

## SUPPORTING INFORMATION

**Table S15.** Comparison of optical properties from **6–9** in the solid-state.

|           | $\lambda_{\text{abs}}$ [nm] <sup>[a]</sup> | $\lambda_{\text{em}}$ [nm] <sup>[b]</sup> | $\Phi_{\text{f}}$ [%] <sup>[c]</sup> |
|-----------|--------------------------------------------|-------------------------------------------|--------------------------------------|
| <b>6a</b> | 357, 343                                   | 478                                       | 18                                   |
| <b>6b</b> | <sup>[d]</sup>                             | 415, 582                                  | 3                                    |
| <b>6c</b> | 358, 343                                   | 490                                       | 7                                    |
| <b>6d</b> | 357, 341                                   | 405                                       | 1                                    |
| <b>7a</b> | 382, 360                                   | -                                         | <0.5                                 |
| <b>7b</b> | 381, 360, 311, 293                         | -                                         | <0.5                                 |
| <b>7c</b> | 379, 360                                   | -                                         | <0.5                                 |
| <b>7d</b> | 380, 360                                   | -                                         | <0.5                                 |
| <b>8a</b> | <sup>[d]</sup>                             | -                                         | <0.5                                 |
| <b>8b</b> | <sup>[d]</sup>                             | -                                         | <0.5                                 |
| <b>8c</b> | <sup>[d]</sup>                             | 634                                       | 1                                    |
| <b>8d</b> | 512, 487                                   | 636                                       | 2                                    |
| <b>9a</b> | 539, 501                                   | 670                                       | 5                                    |
| <b>9b</b> | 540, 501, 469                              | 653                                       | 3                                    |
| <b>9c</b> | 537, 501                                   | 670                                       | 5                                    |
| <b>9d</b> | 528, 489, 458                              | 585, 640                                  | 17                                   |

[a] Absorption properties from spin-coated thin-films. [b] Fluorescence properties from bulk powder samples, which might be affected by reabsorption effects. [c] Effective fluorescence quantum yields of bulk powder samples were determined using an integration sphere. Represent the lower limit of the intrinsic fluorescence quantum yields due to reabsorption effects. [d] Precise determination not possible due to weak resolution of absorption spectra (low solubility of substrate).

## SUPPORTING INFORMATION

**Table S16.** Comparison of fluorescence quantum yields from **6–9** in chloroform solution and bulk powder.

|           | $\Phi_f$ (CHCl <sub>3</sub> ) [%] <sup>[a]</sup> | $\Phi_f$ (powder) [%] <sup>[b]</sup> |
|-----------|--------------------------------------------------|--------------------------------------|
| <b>6a</b> | <0.5                                             | 18                                   |
| <b>6b</b> | <0.5                                             | 3                                    |
| <b>6c</b> | <0.5                                             | 7                                    |
| <b>6d</b> | <0.5                                             | 1                                    |
| <b>7a</b> | <0.5                                             | <0.5                                 |
| <b>7b</b> | <0.5                                             | <0.5                                 |
| <b>7c</b> | <0.5                                             | <0.5                                 |
| <b>7d</b> | <0.5                                             | <0.5                                 |
| <b>8a</b> | 87 +/-4                                          | <0.5                                 |
| <b>8b</b> | 86 +/-4                                          | <0.5                                 |
| <b>8c</b> | 84 +/-4                                          | 1                                    |
| <b>8d</b> | 84 +/-4                                          | 2                                    |
| <b>9a</b> | 95 +/-2                                          | 5                                    |
| <b>9b</b> | 96 +/-1                                          | 3                                    |
| <b>9c</b> | 97 +/-1                                          | 5                                    |
| <b>9d</b> | 93 +/-2                                          | 17                                   |

[a] Fluorescence quantum yields were determined using the relative method ( $A < 0.05$ ) and *N,N*-bis(2,6-diisopropylphenyl)perylene-3,4:9,10-bis(dicarboximide) ( $\Phi_f$  (CHCl<sub>3</sub>) = 1.00). [b] Fluorescence quantum yields of bulk powder samples were determined using an integration sphere.

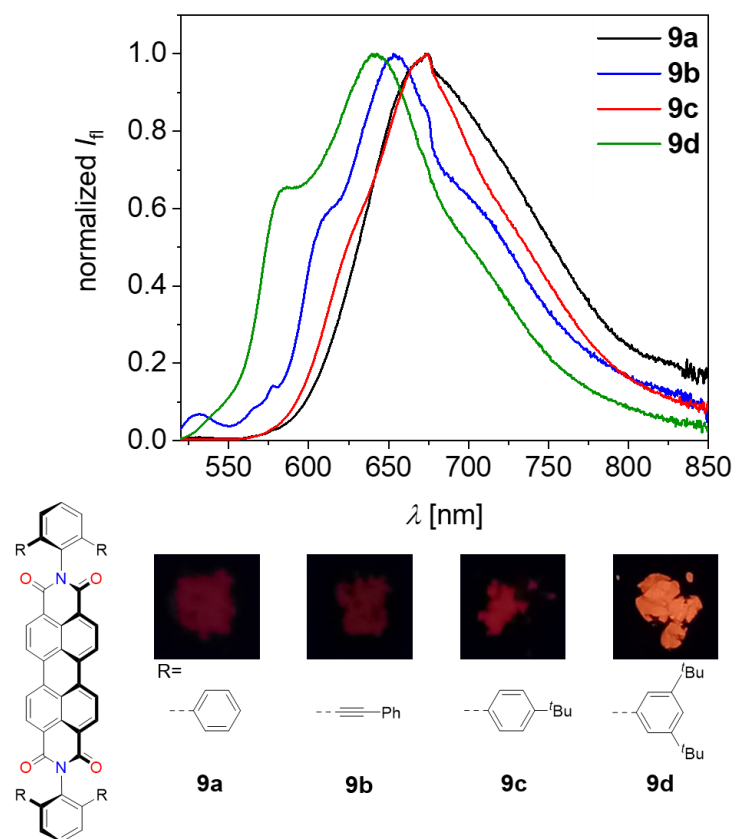

**Figure S16.** Solid-state (powder) fluorescence spectra of **9a–d** (top) and photographs of powder samples from **9a–d** under UV-light irradiation.

## SUPPORTING INFORMATION

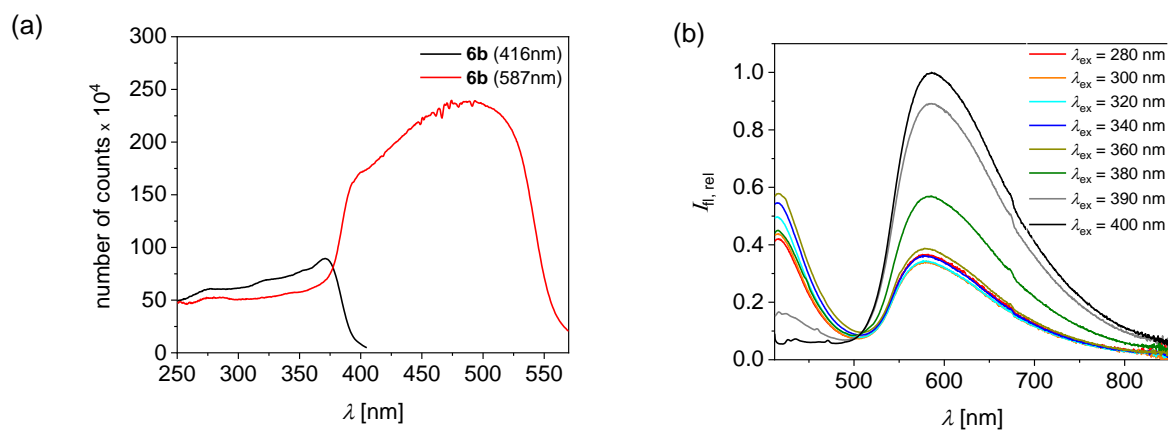

**Figure S17.** (a) Excitation spectra of **6b** (black line:  $\lambda_{\text{rec}} = 416$  nm; red line:  $\lambda_{\text{rec}} = 587$  nm). (b) Relative excitation-dependent fluorescence spectra from powder sample of **6b**.

**Table S17.** Determined fluorescence lifetime decays of **6a–d** ( $\lambda_{\text{ex}} = 378$  nm) in powder samples.

|           | $\lambda_{\text{det}}$ [nm] | $\tau$ [ns]                                                          |
|-----------|-----------------------------|----------------------------------------------------------------------|
| <b>6a</b> | 477                         | $\tau_1 = 12.97 \pm 0.64$ (5.4%)                                     |
|           |                             | $\tau_2 = 30.45 \pm 0.07$ (94.6%)                                    |
| <b>6b</b> | 416                         | $\tau_1 = 2.57 \pm 0.01$                                             |
|           | 578                         | $\tau_1 = 1.00 \pm 0.04$ (38.0%)<br>$\tau_2 = 3.39 \pm 0.09$ (62.0%) |
| <b>6c</b> | 489                         | $\tau_1 = 6.33 \pm 0.22$ (7.3%)<br>$\tau_2 = 18.84 \pm 0.04$ (92.7%) |
| <b>6d</b> | 405                         | $\tau_1 = 0.32 \pm 0.002$ (60.5%)                                    |
|           |                             | $\tau_2 = 1.90 \pm 0.01$ (39.5%)                                     |



## SUPPORTING INFORMATION

## NMR spectra

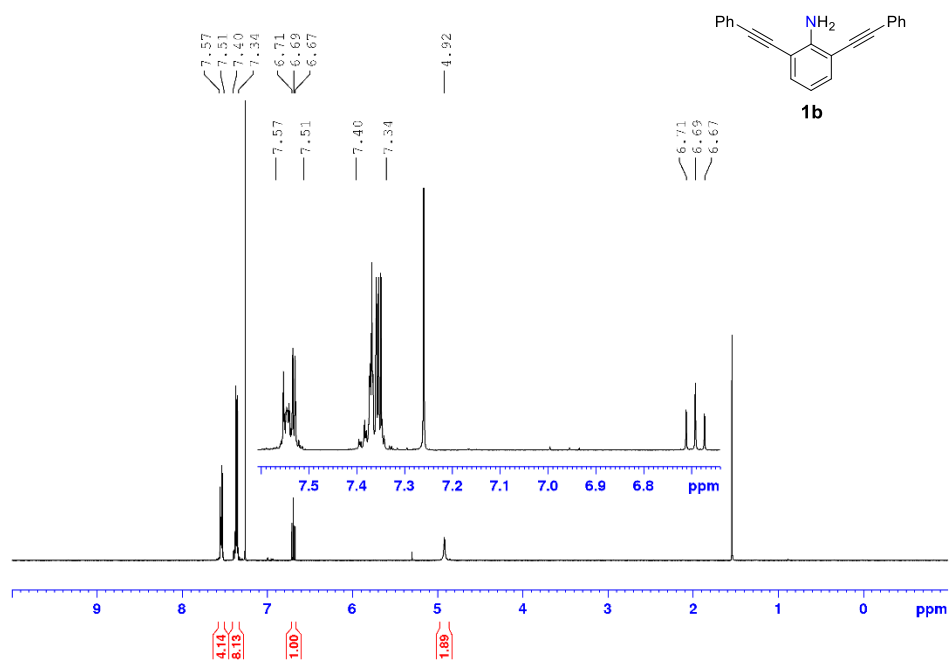

Figure S18. <sup>1</sup>H NMR (400 MHz) of **1b** in CDCl<sub>3</sub> at room temperature.

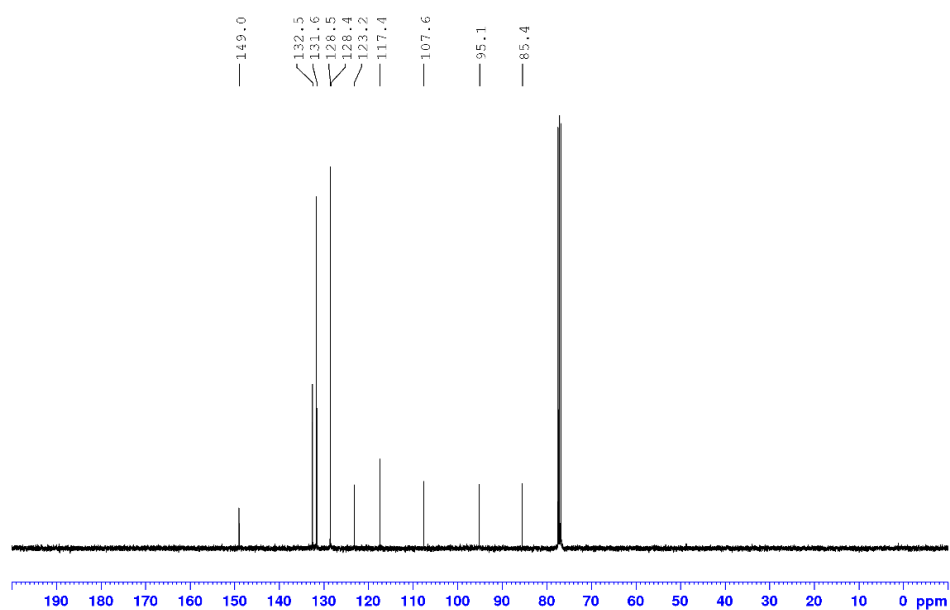

Figure S19. <sup>13</sup>C NMR (101 MHz) of **1b** in CDCl<sub>3</sub> at room temperature.

## SUPPORTING INFORMATION

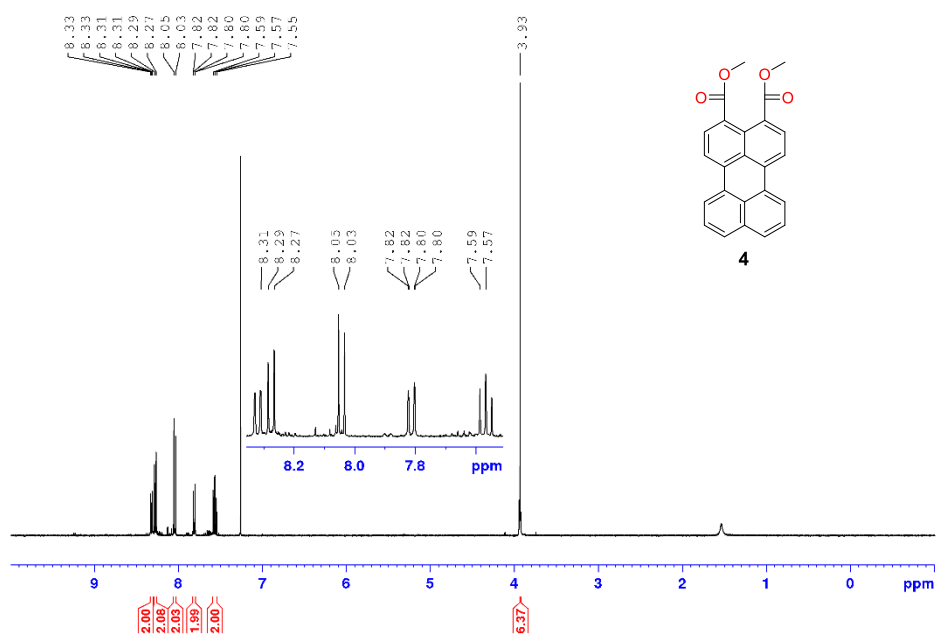

**Figure S20.**  $^1\text{H}$  NMR (400 MHz) of **4** in  $\text{CDCl}_3$  at room temperature.

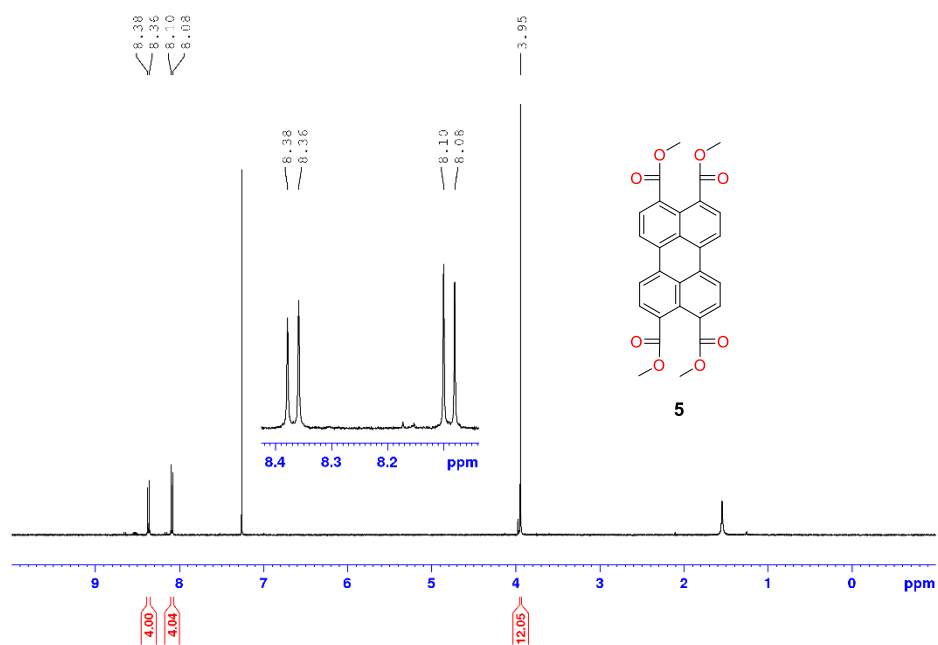

**Figure S21.**  $^1\text{H}$  NMR (400 MHz) of **5** in  $\text{CDCl}_3$  at room temperature.

## SUPPORTING INFORMATION

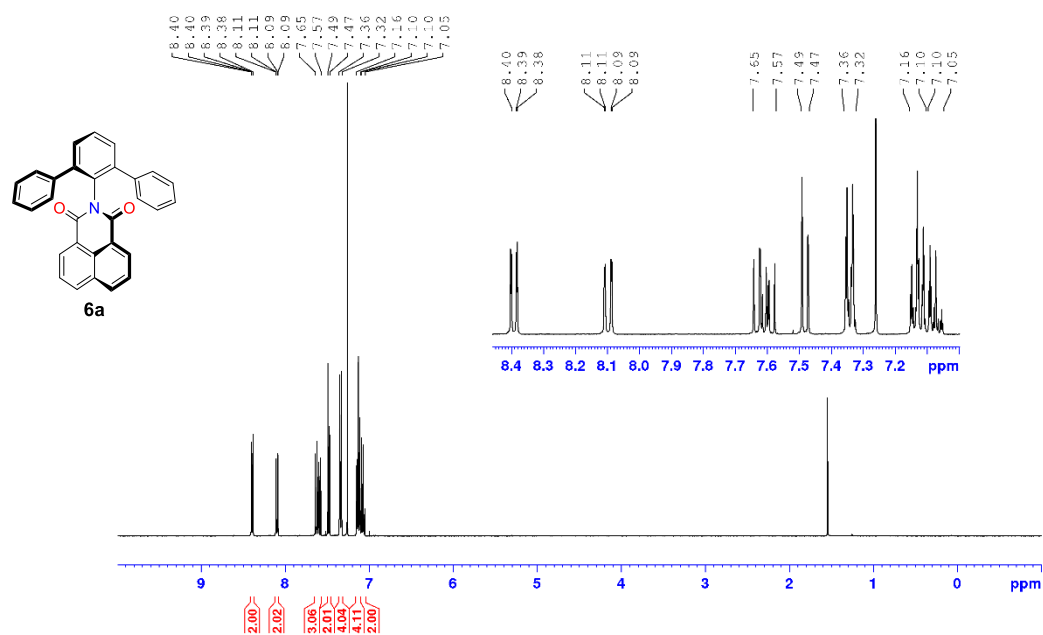

Figure S22.  $^1\text{H}$  NMR (400 MHz) of **6a** in  $\text{CDCl}_3$  at room temperature.

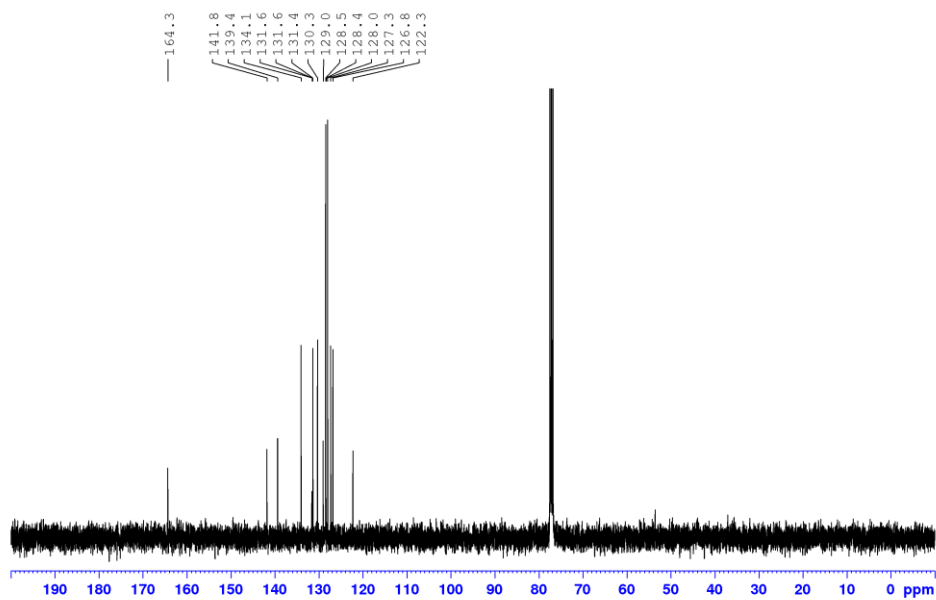

Figure S23.  $^{13}\text{C}$  NMR (101 MHz) of **6a** in  $\text{CDCl}_3$  at room temperature.

## SUPPORTING INFORMATION

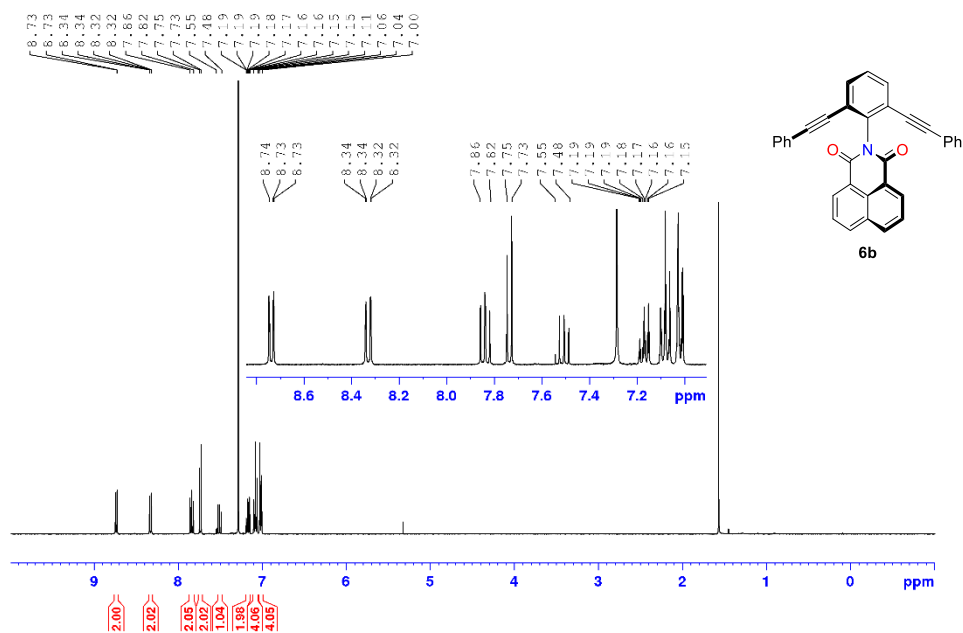

Figure S24. <sup>1</sup>H NMR (400 MHz) of **6b** in CDCl<sub>3</sub> at room temperature.

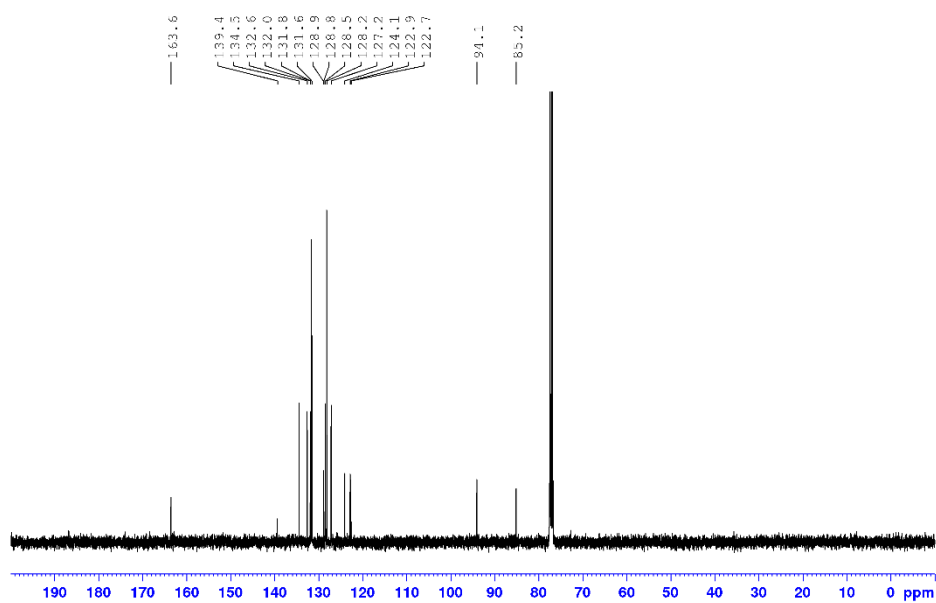

Figure S25. <sup>13</sup>C NMR (101 MHz) of **6b** in CDCl<sub>3</sub> at room temperature.

## SUPPORTING INFORMATION

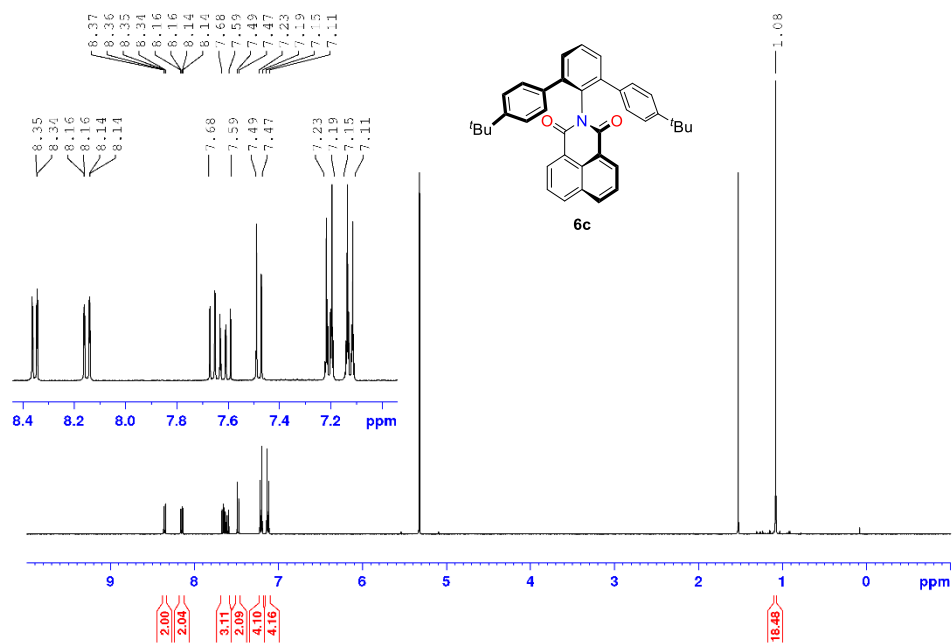

Figure S26. <sup>1</sup>H NMR (400 MHz) of **6c** in CD<sub>2</sub>Cl<sub>2</sub> at room temperature.

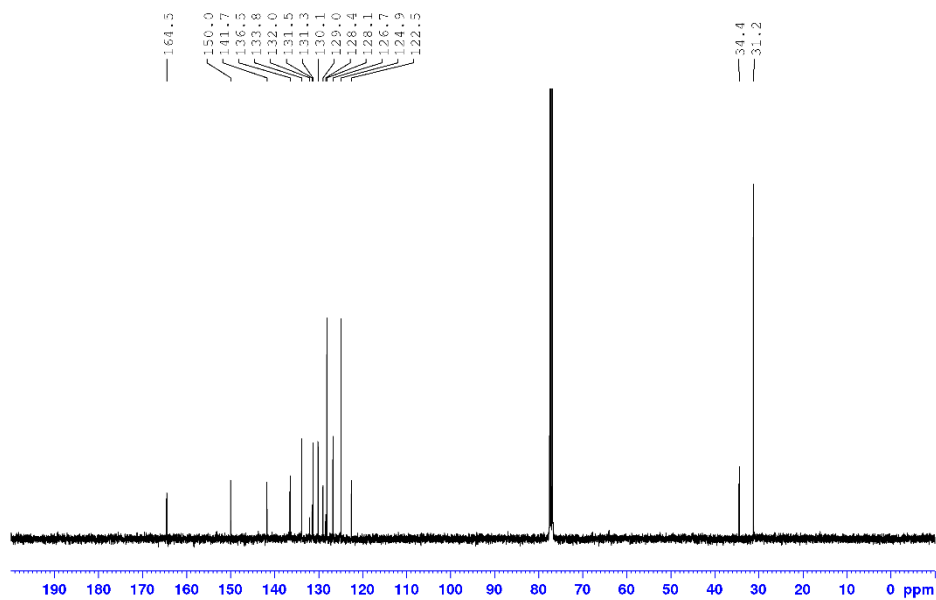

Figure S27. <sup>13</sup>C NMR (101 MHz) of **6c** in CDCl<sub>3</sub> at room temperature.

## SUPPORTING INFORMATION

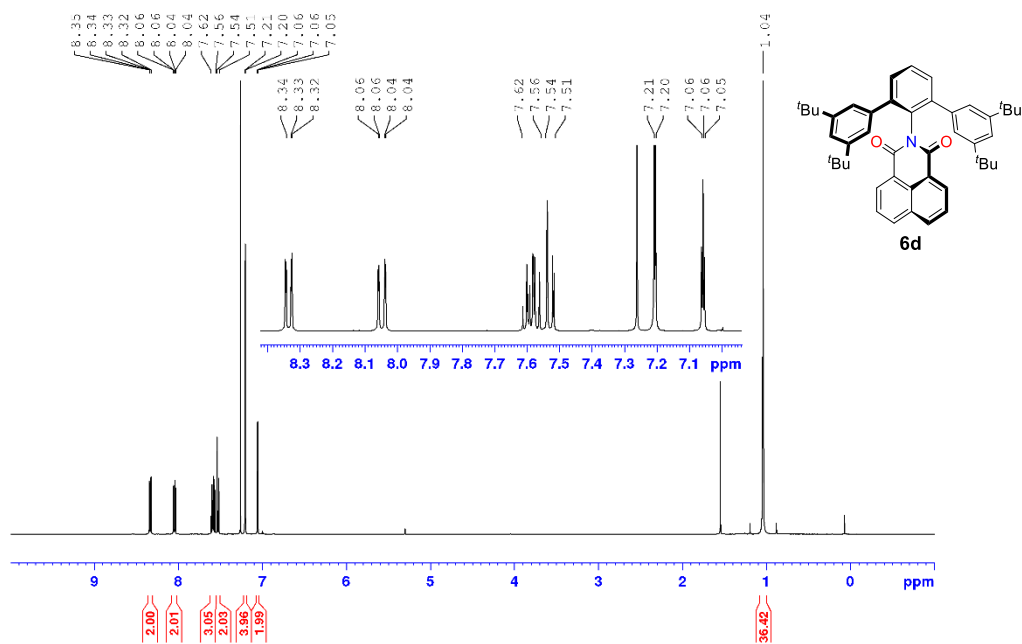

**Figure S28.**  $^1\text{H}$  NMR (400 MHz) of **6d** in  $\text{CDCl}_3$  at room temperature.

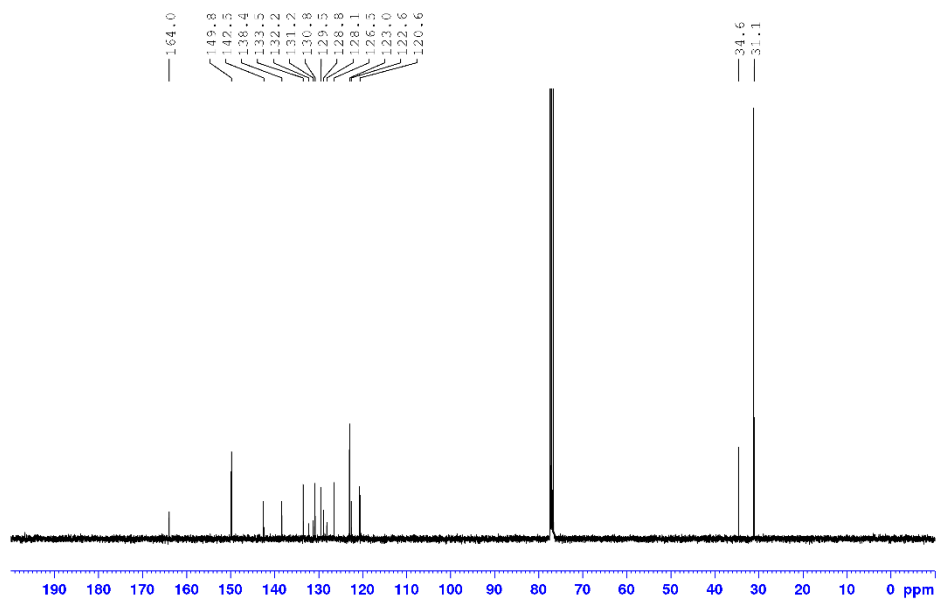

**Figure S29.**  $^{13}\text{C}$  NMR (101 MHz) of **6d** in  $\text{CDCl}_3$  at room temperature.

## SUPPORTING INFORMATION

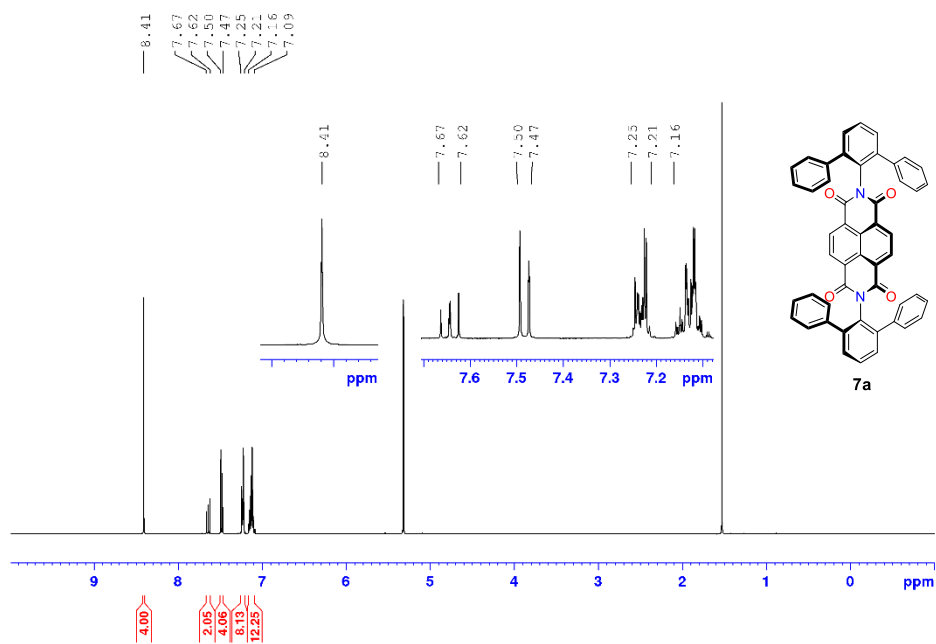

Figure S30.  $^1\text{H}$  NMR (400 MHz) of **7a** in  $\text{CD}_2\text{Cl}_2$  at room temperature.

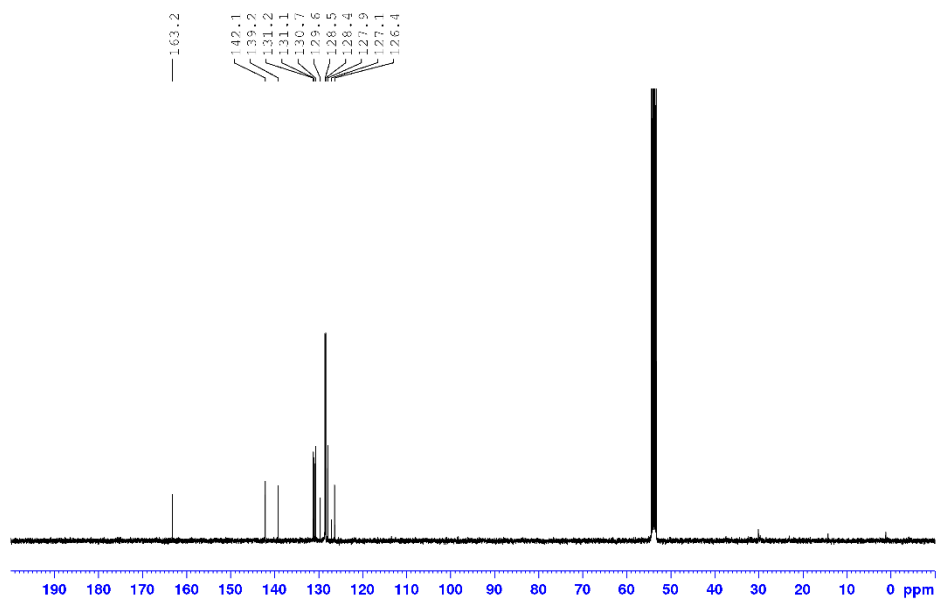

Figure S31.  $^{13}\text{C}$  NMR (101 MHz) of **7a** in  $\text{CD}_2\text{Cl}_2$  at room temperature.

## SUPPORTING INFORMATION

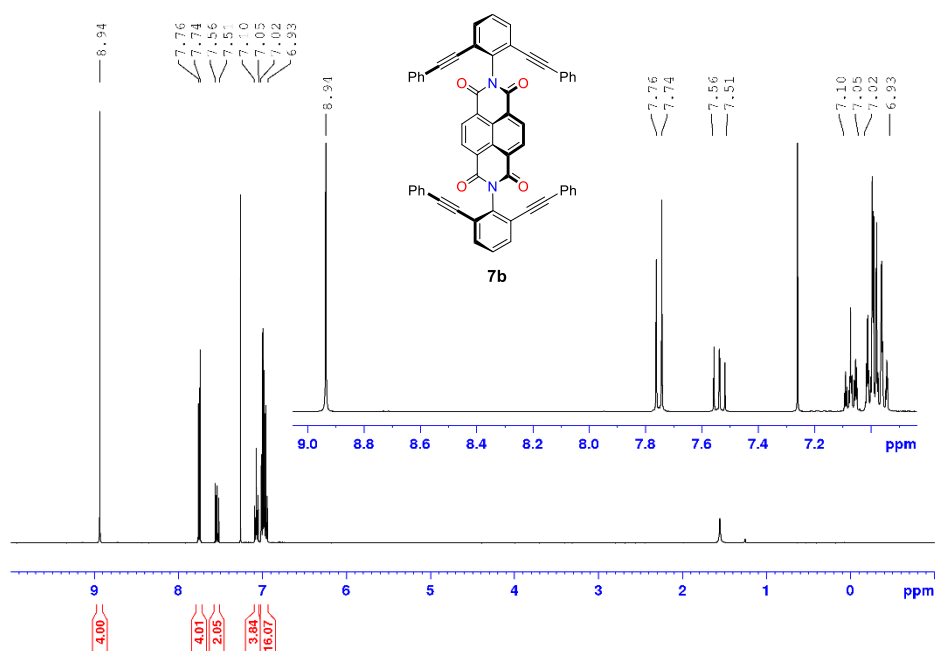

Figure S32. <sup>1</sup>H NMR (400 MHz) of **7b** in CDCl<sub>3</sub> at room temperature.

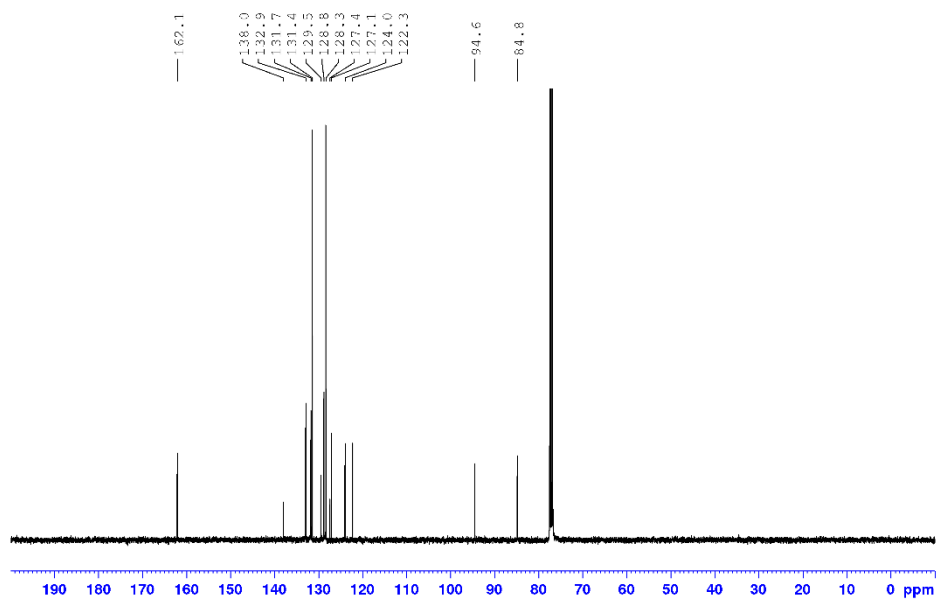

Figure S33. <sup>13</sup>C NMR (101 MHz) of **7b** in CDCl<sub>3</sub> at room temperature.



## SUPPORTING INFORMATION

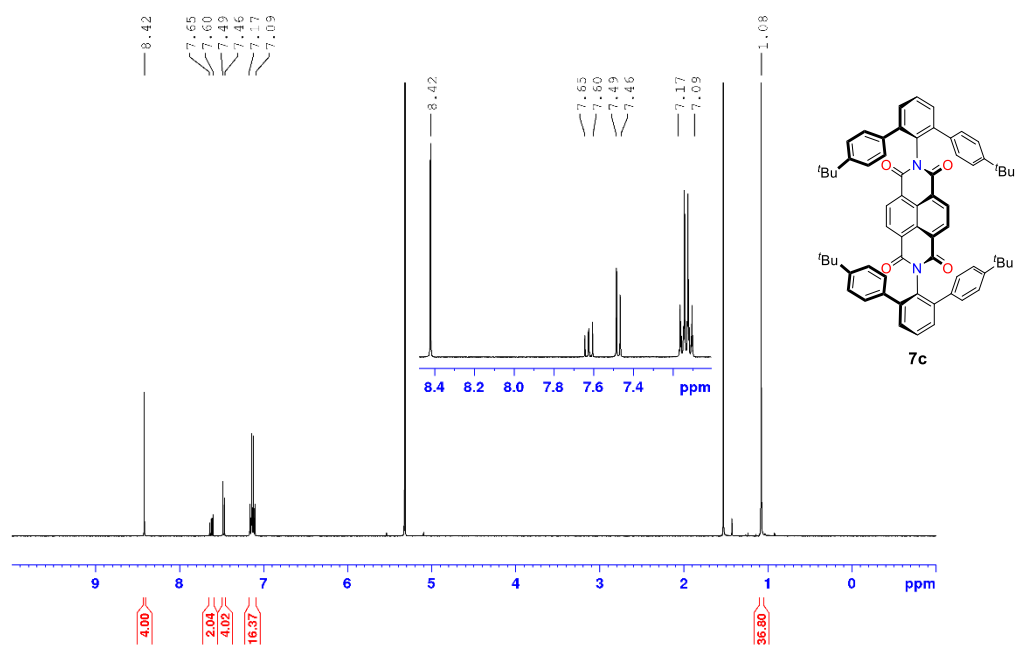

**Figure S34.**  $^1\text{H}$  NMR (400 MHz) of **7c** in  $\text{CD}_2\text{Cl}_2$  at room temperature.

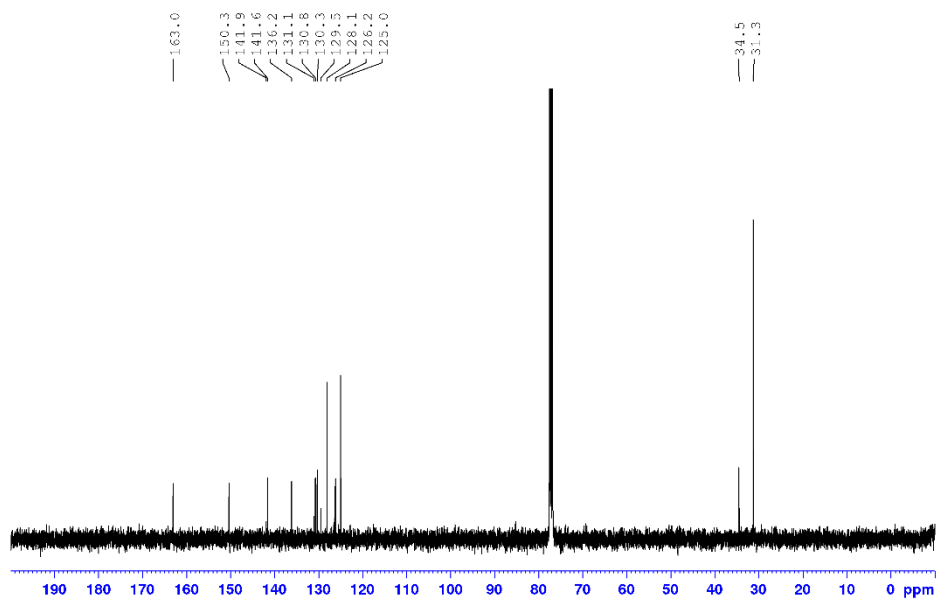

**Figure S35.**  $^{13}\text{C}$  NMR (101 MHz) of **7c** in  $\text{CDCl}_3$  at room temperature.

## SUPPORTING INFORMATION

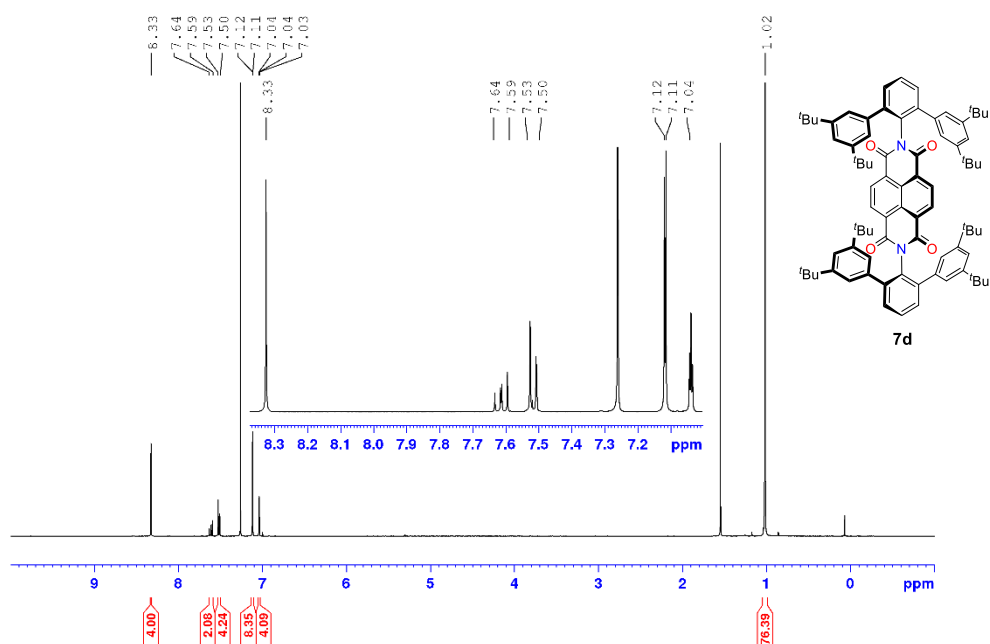

Figure S36. <sup>1</sup>H NMR (400 MHz) of **7d** in CDCl<sub>3</sub> at room temperature.

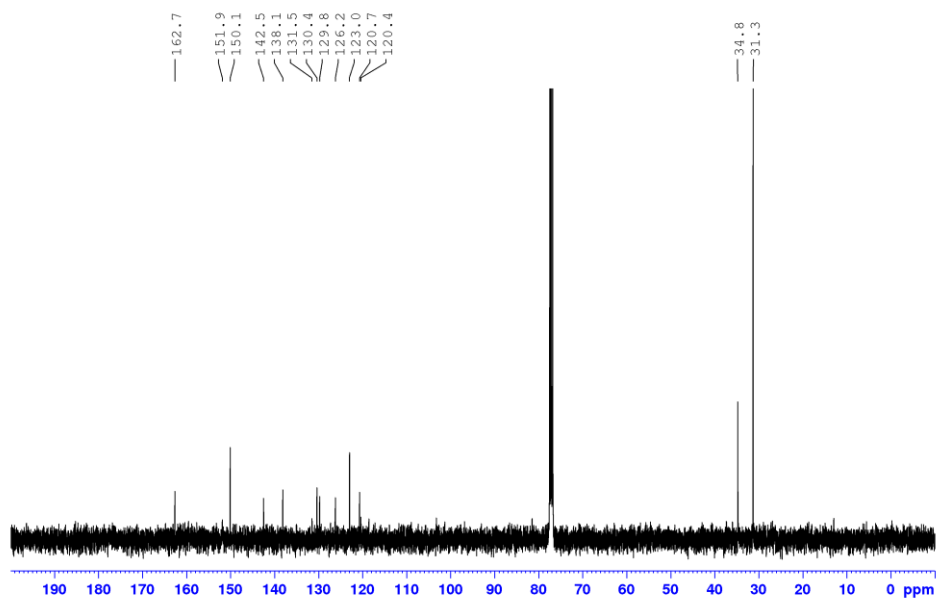

Figure S37. <sup>13</sup>C NMR (101 MHz) of **7d** in CDCl<sub>3</sub> at room temperature.

## SUPPORTING INFORMATION

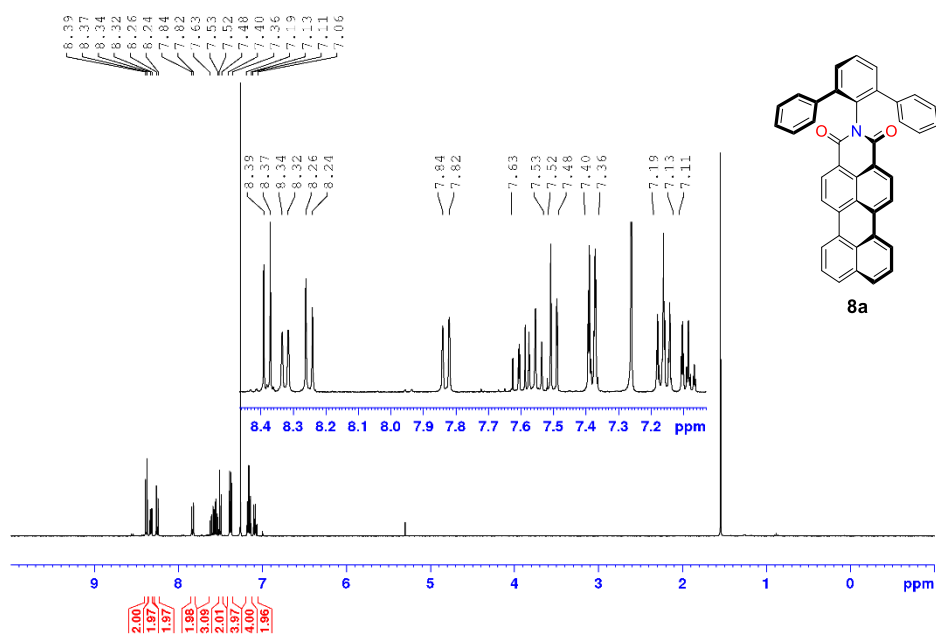

Figure S38. <sup>1</sup>H NMR (400 MHz) of **8a** in CDCl<sub>3</sub> at room temperature.

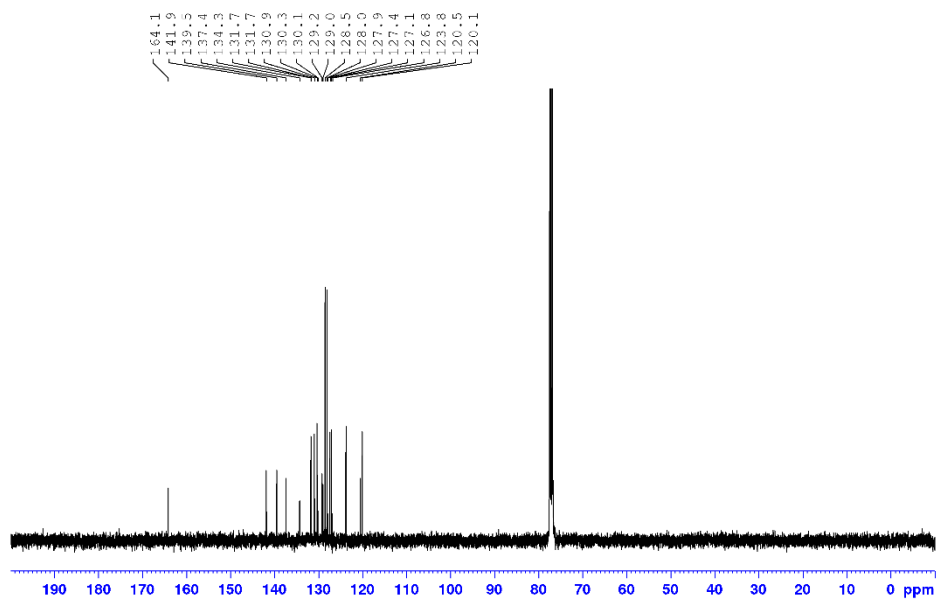

Figure S39. <sup>13</sup>C NMR (101 MHz) of **8a** in CDCl<sub>3</sub> at room temperature.

## SUPPORTING INFORMATION

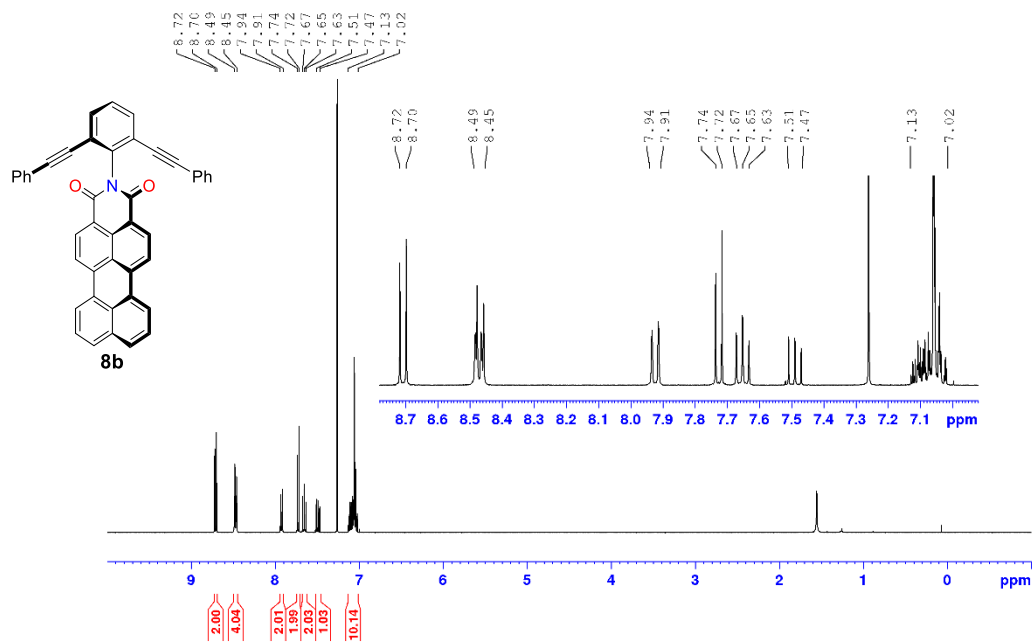

Figure S40. <sup>1</sup>H NMR (400 MHz) of **8b** in CDCl<sub>3</sub> at room temperature.

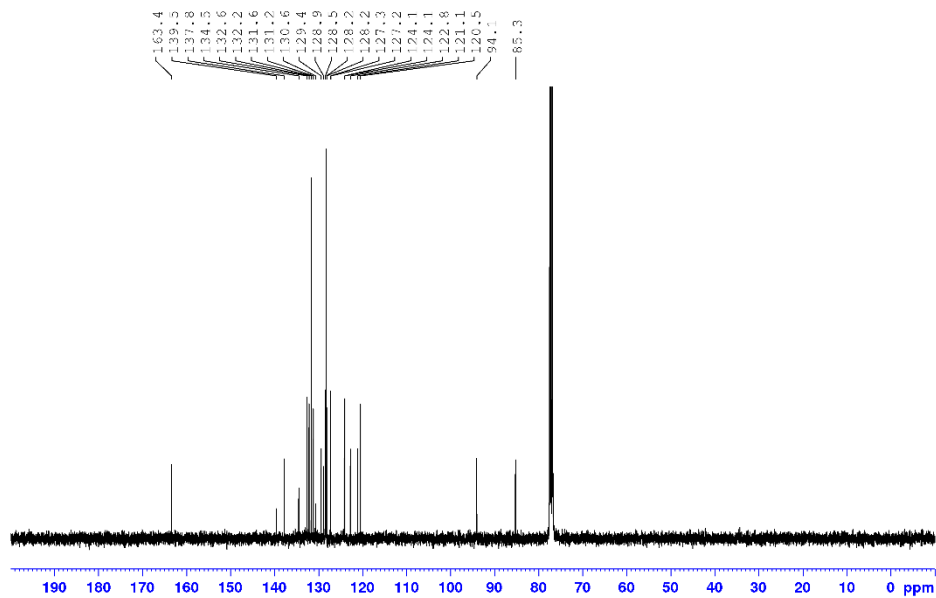

Figure S41. <sup>13</sup>C NMR (101 MHz) of **8b** in CDCl<sub>3</sub> at room temperature.

## SUPPORTING INFORMATION

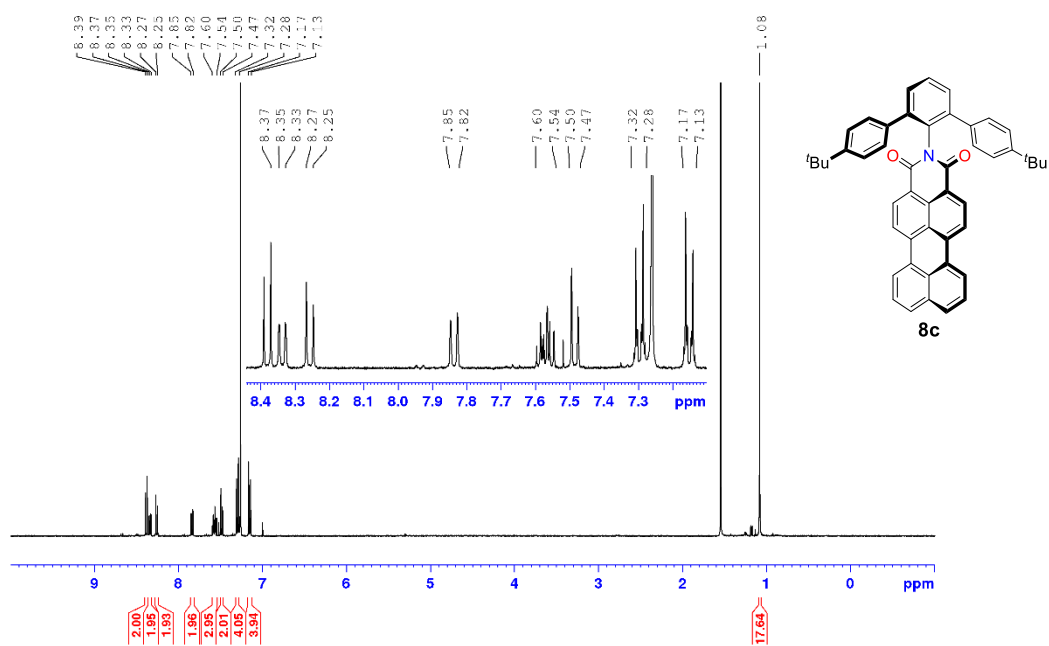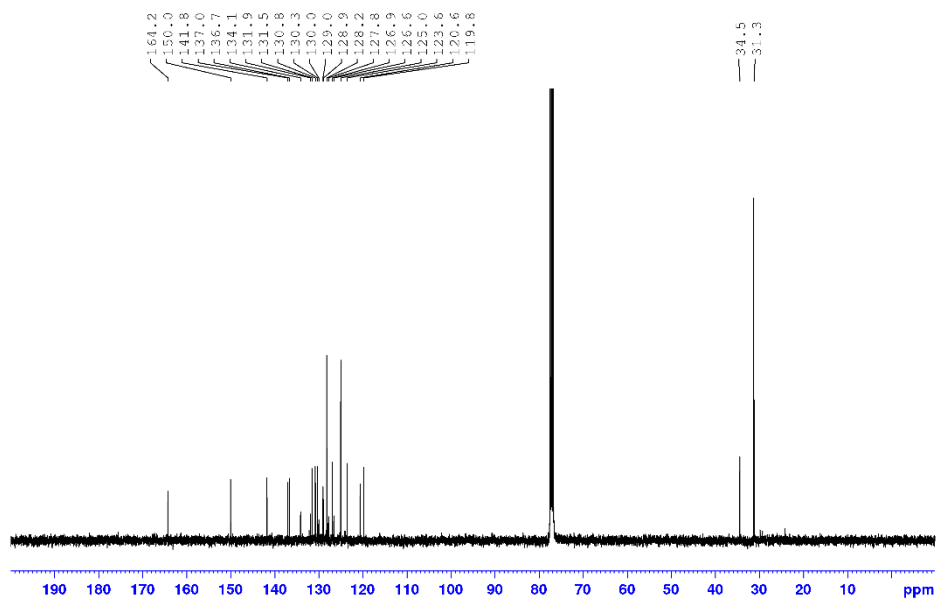

## SUPPORTING INFORMATION

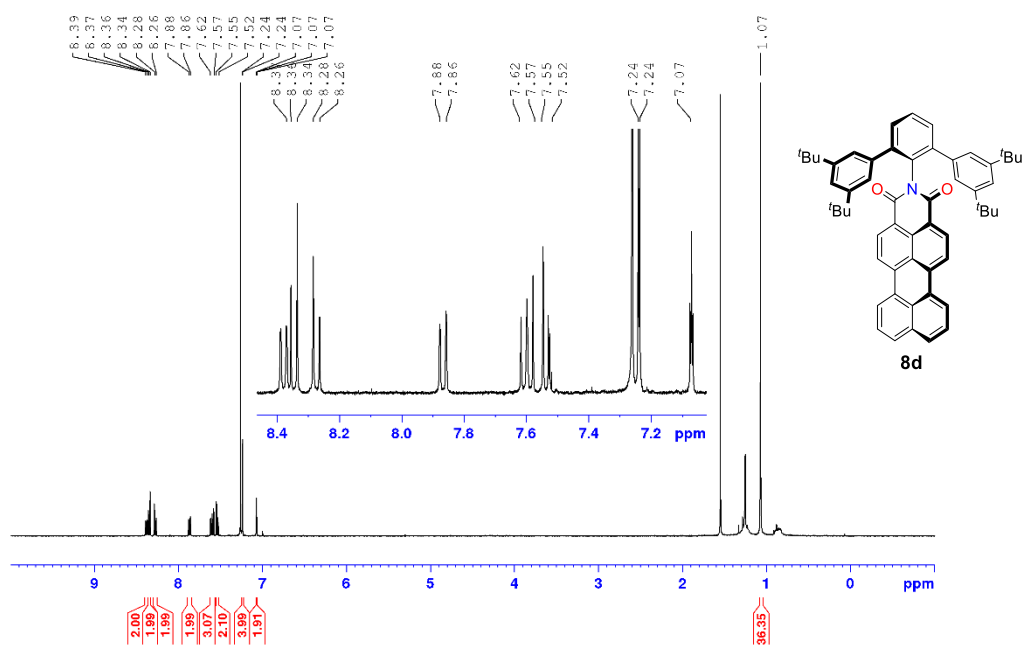

**Figure S44.**  $^1\text{H}$  NMR (400 MHz) of **8d** in  $\text{CDCl}_3$  at room temperature.

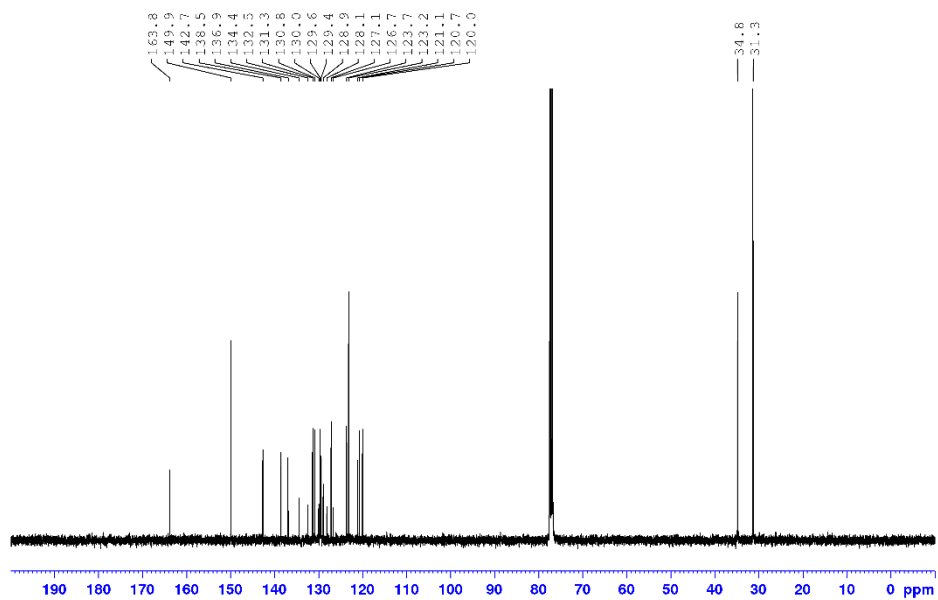

**Figure S45.**  $^{13}\text{C}$  NMR (101 MHz) of **8d** in  $\text{CDCl}_3$  at room temperature.

## SUPPORTING INFORMATION

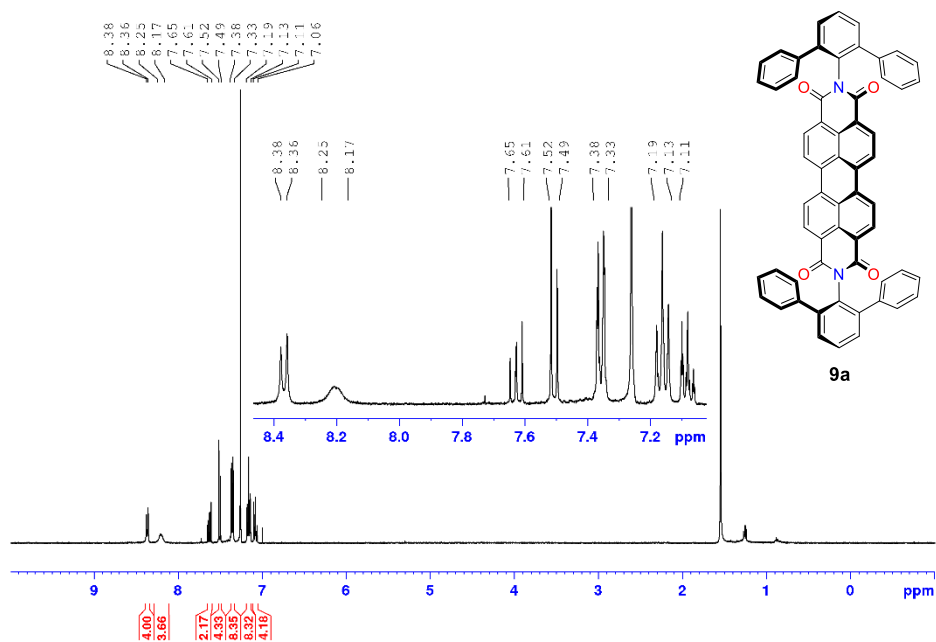

Figure S46. <sup>1</sup>H NMR (400 MHz) of **9a** in CDCl<sub>3</sub> at room temperature.

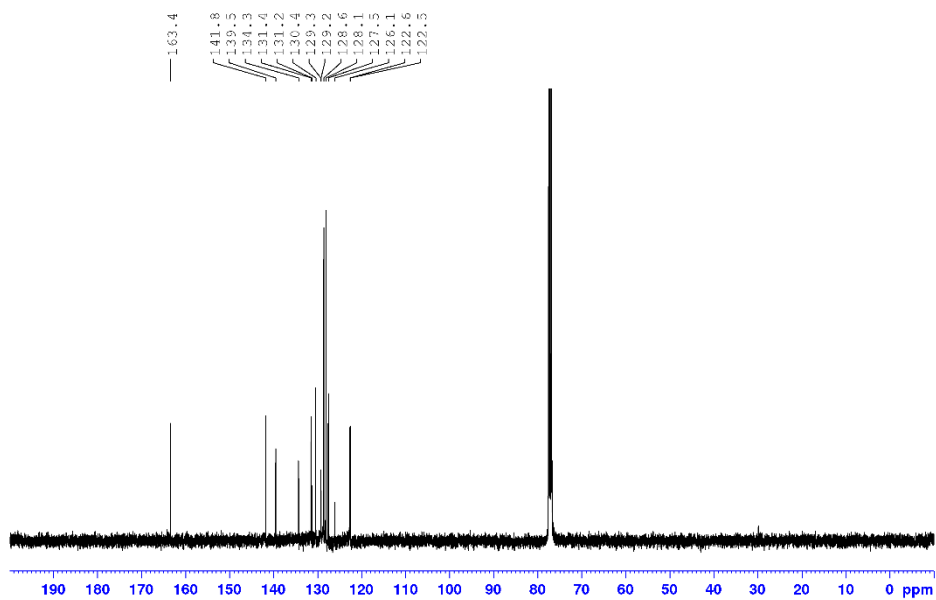

Figure S47. <sup>13</sup>C NMR (101 MHz) of **9a** in CDCl<sub>3</sub> at room temperature.

## SUPPORTING INFORMATION

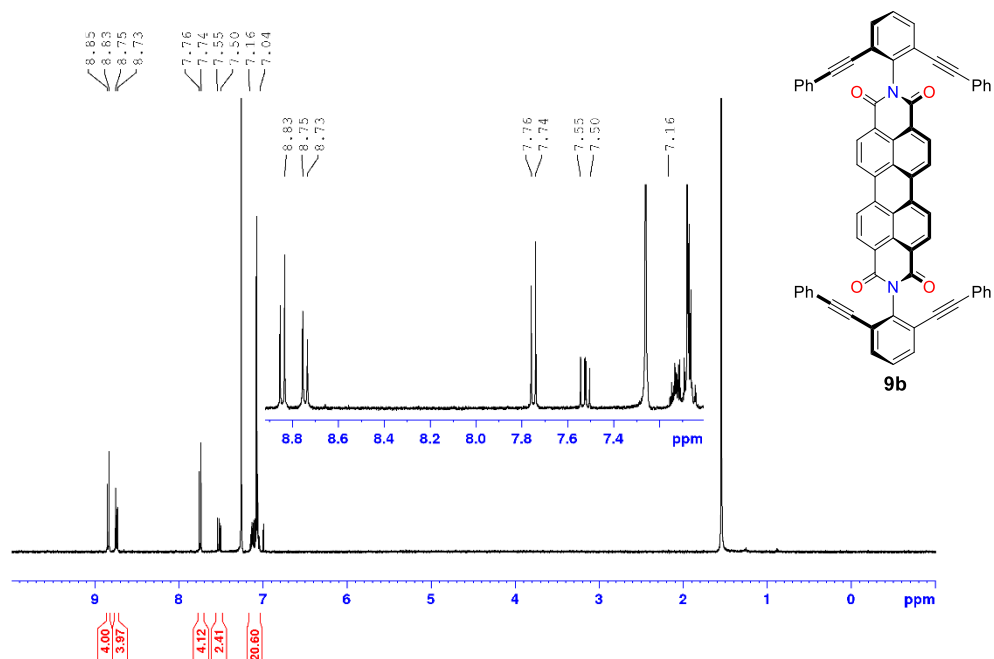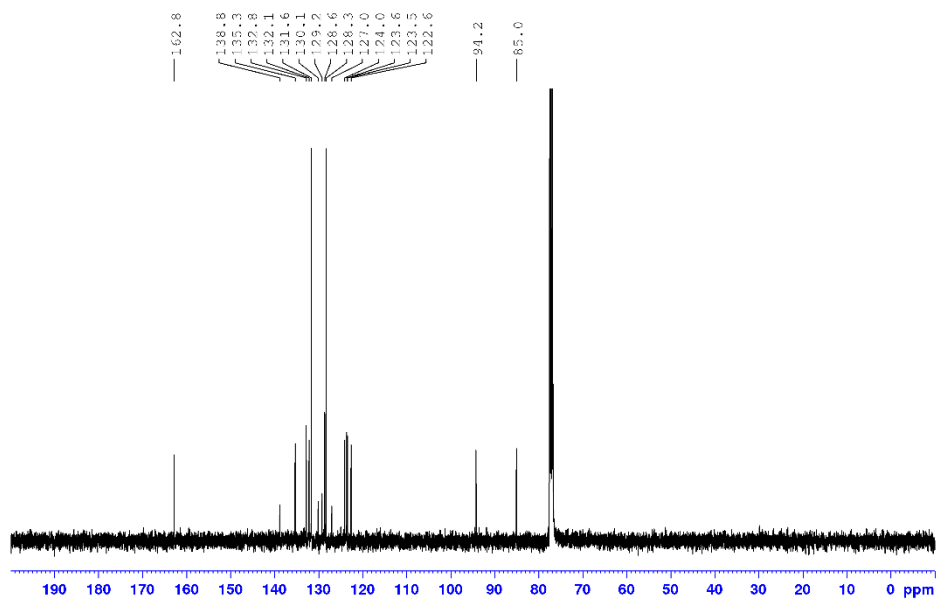



## SUPPORTING INFORMATION

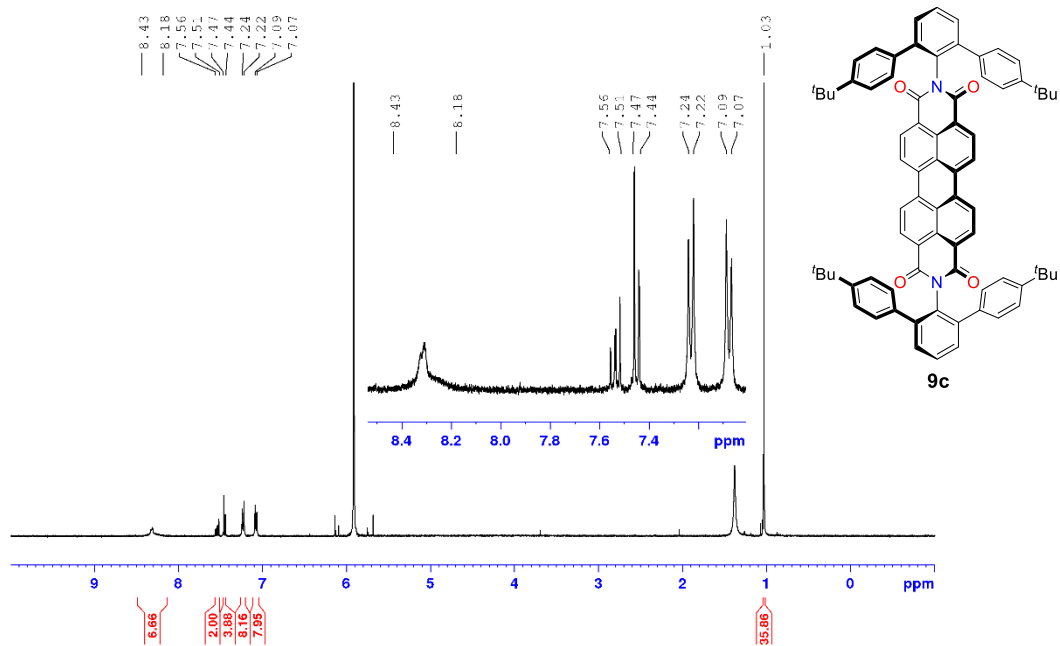

**Figure S50.**  $^1\text{H}$  NMR (400 MHz) of **9c** in  $\text{C}_2\text{D}_2\text{Cl}_4$  at 373 K.

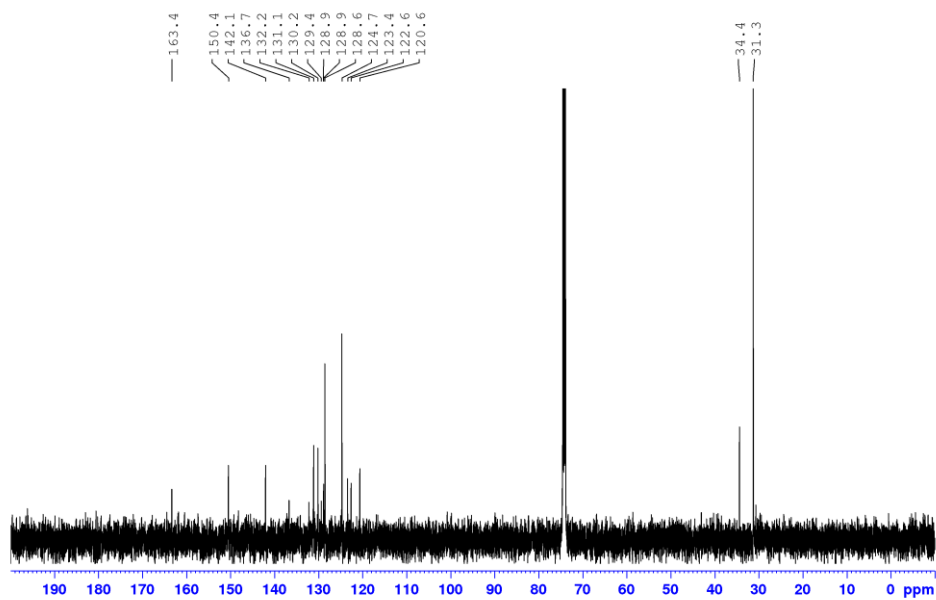

**Figure S51.**  $^{13}\text{C}$  NMR (101 MHz) of **9c** in  $\text{C}_2\text{D}_2\text{Cl}_4$  at 373 K.

## SUPPORTING INFORMATION

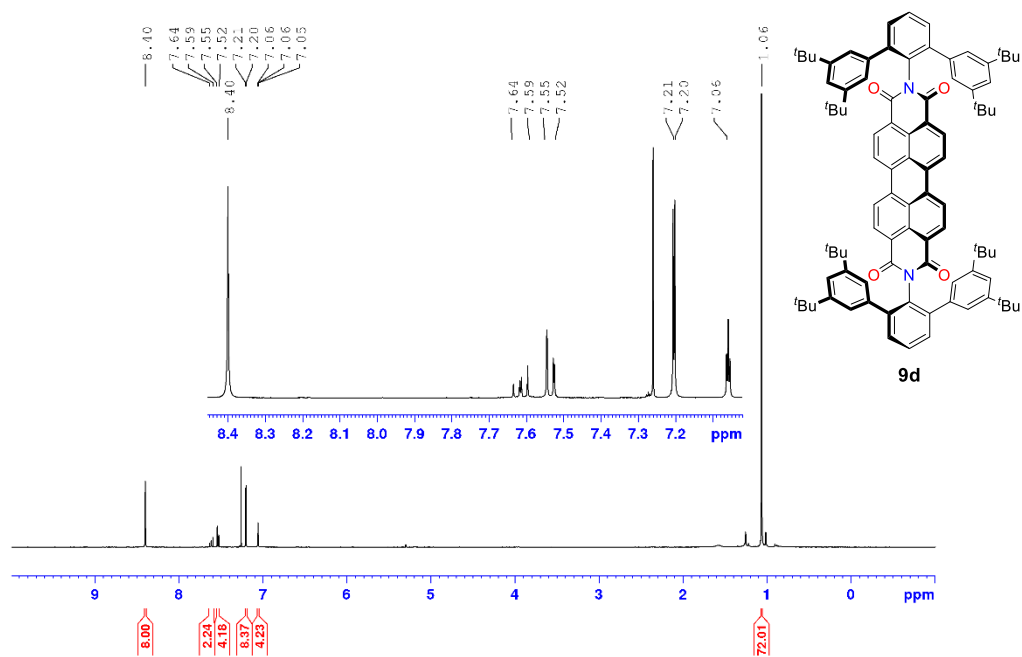

**Figure S52.**  $^1\text{H}$  NMR (400 MHz) of **9d** in  $\text{CDCl}_3$  at room temperature.

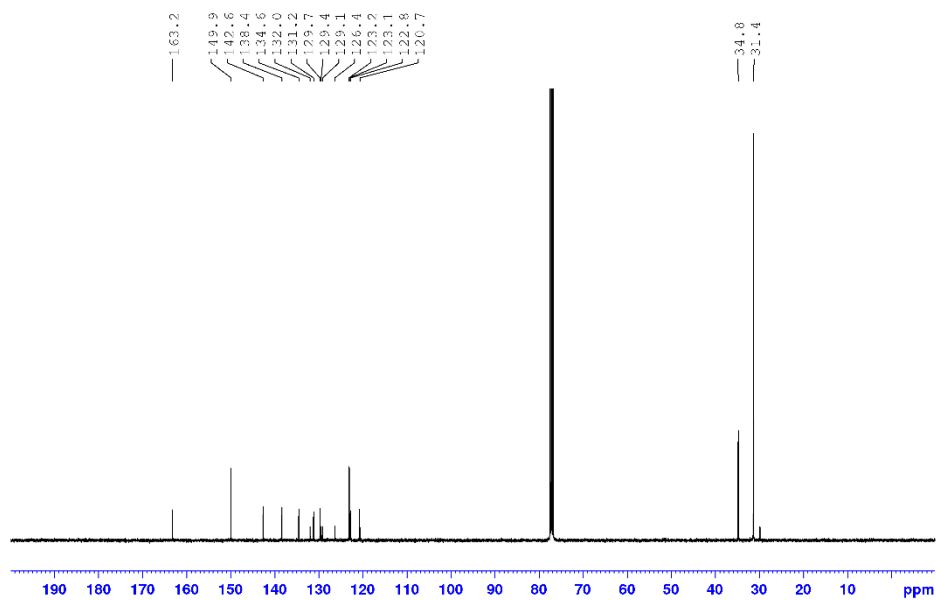

**Figure S53.**  $^{13}\text{C}$  NMR (101 MHz) of **9d** in  $\text{CDCl}_3$  at room temperature.

## SUPPORTING INFORMATION

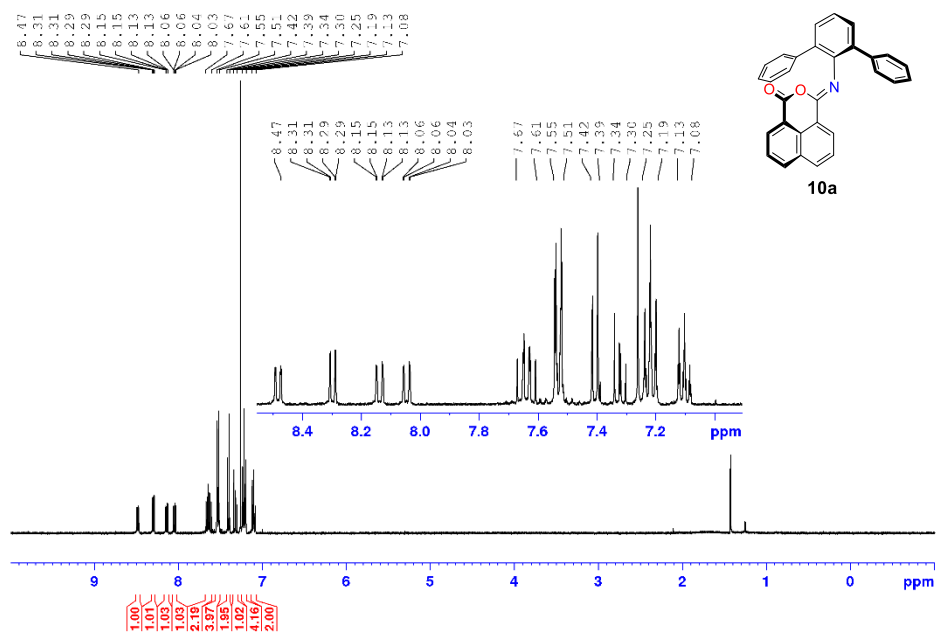

Figure S54.  $^1\text{H}$  NMR (400 MHz) of **10a** in  $\text{CDCl}_3$  at room temperature.

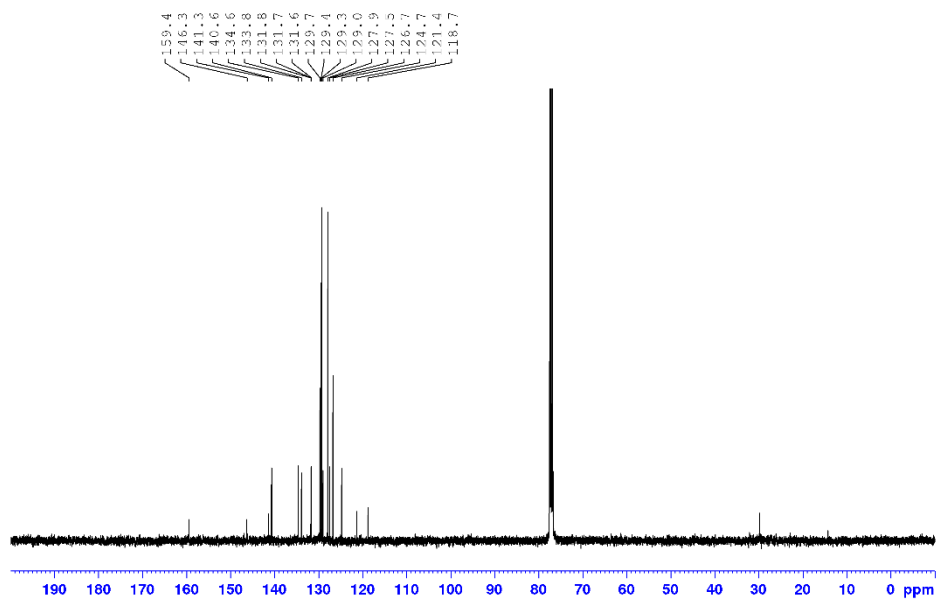

Figure S55.  $^{13}\text{C}$  NMR (101 MHz) of **10a** in  $\text{CDCl}_3$  at room temperature.

## SUPPORTING INFORMATION

## Mass spectra

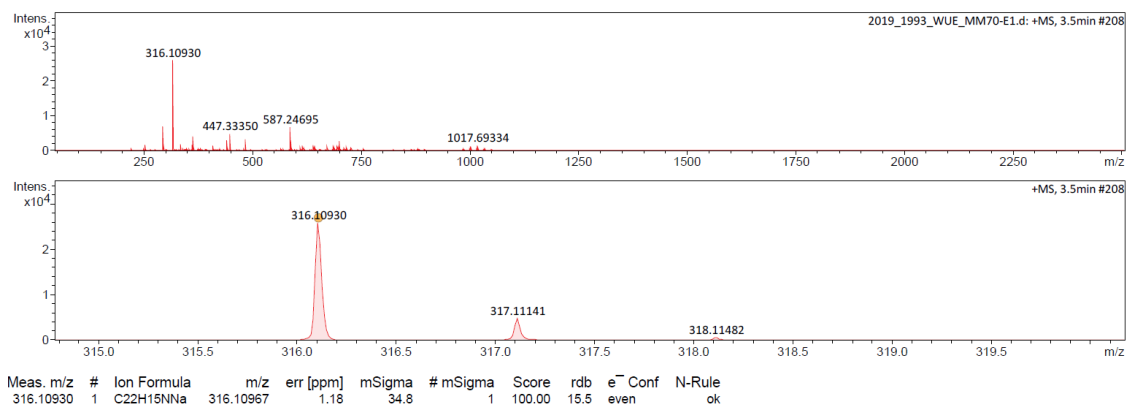Figure S56. HRMS (ESI-TOF, pos. mode, acetonitrile/chloroform 1/1) spectra of **1b**.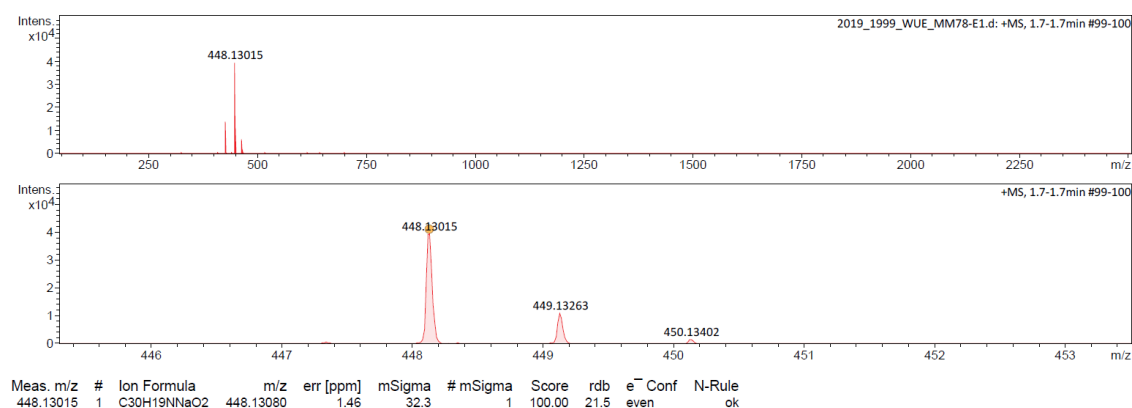Figure S57. HRMS (ESI-TOF, pos. mode, acetonitrile/chloroform 1/1) spectra of **6a**.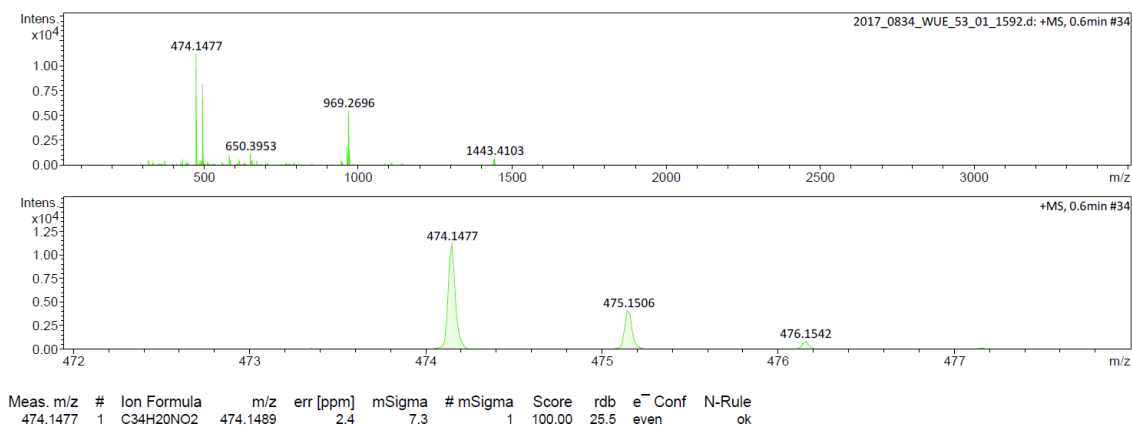Figure S58. HRMS (ESI-TOF, pos. mode, acetonitrile/chloroform 1/1) spectra of **6b**.

## SUPPORTING INFORMATION

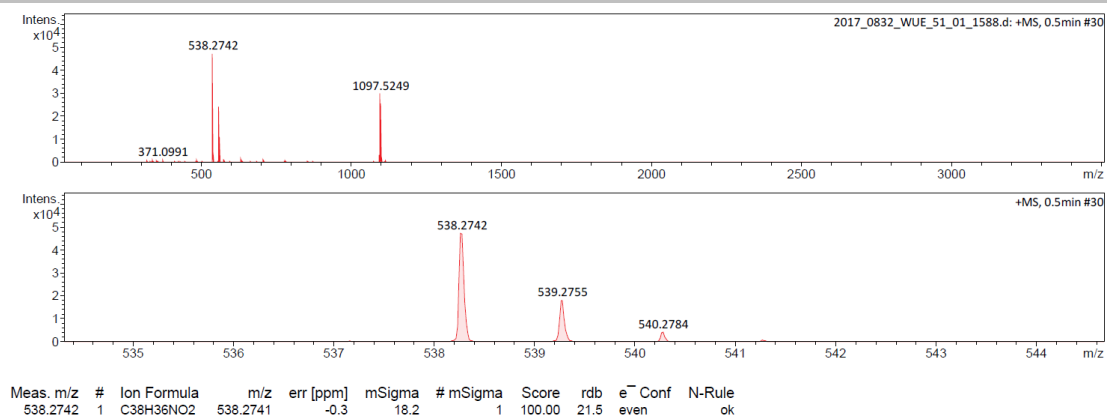

Figure S59. HRMS (ESI-TOF, pos. mode, acetonitrile/chloroform 1/1) spectra of 6c.

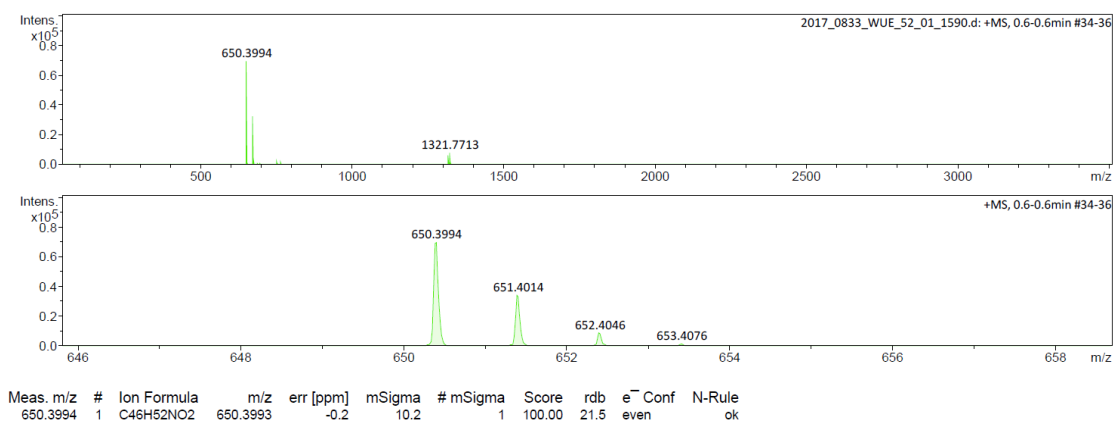

Figure S60. HRMS (ESI-TOF, pos. mode, acetonitrile/chloroform 1/1) spectra of 6d.

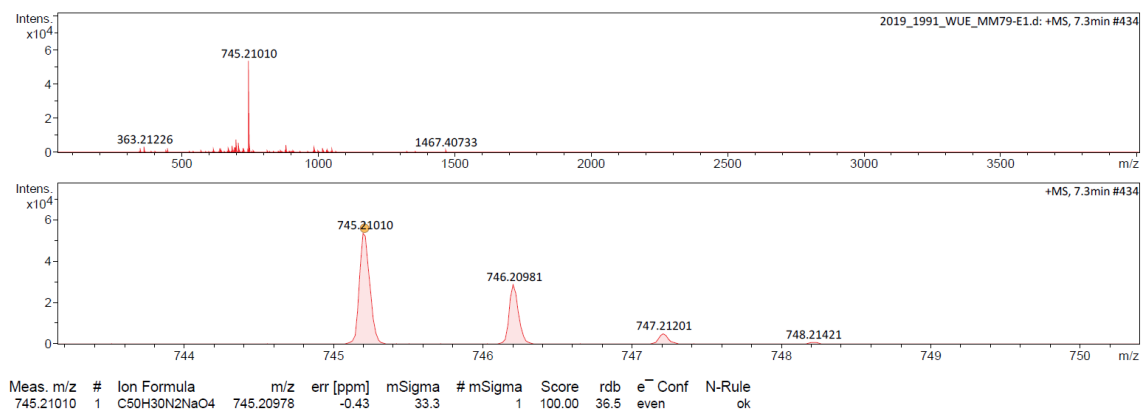

Figure S61. HRMS (ESI-TOF, pos. mode, acetonitrile/chloroform 1/1) spectra of 7a.

## SUPPORTING INFORMATION

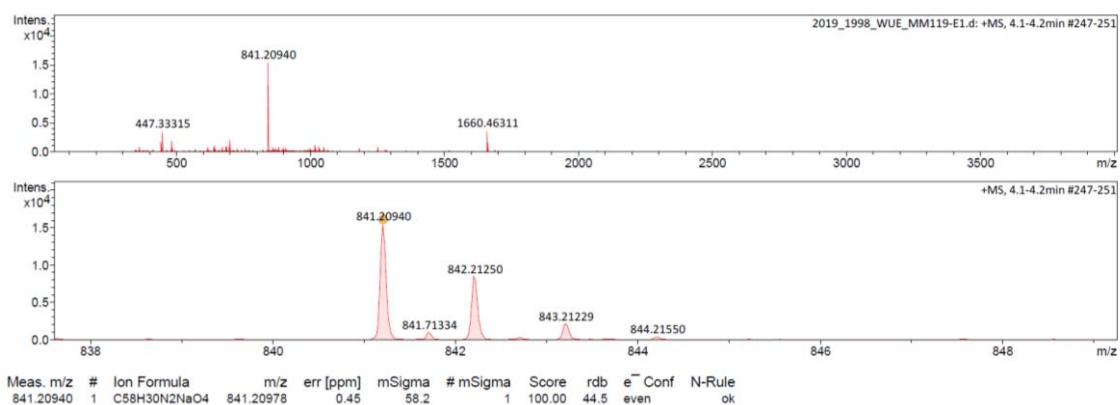

Figure S62. HRMS (ESI-TOF, pos. mode, acetonitrile/chloroform 1/1) spectra of 7b.

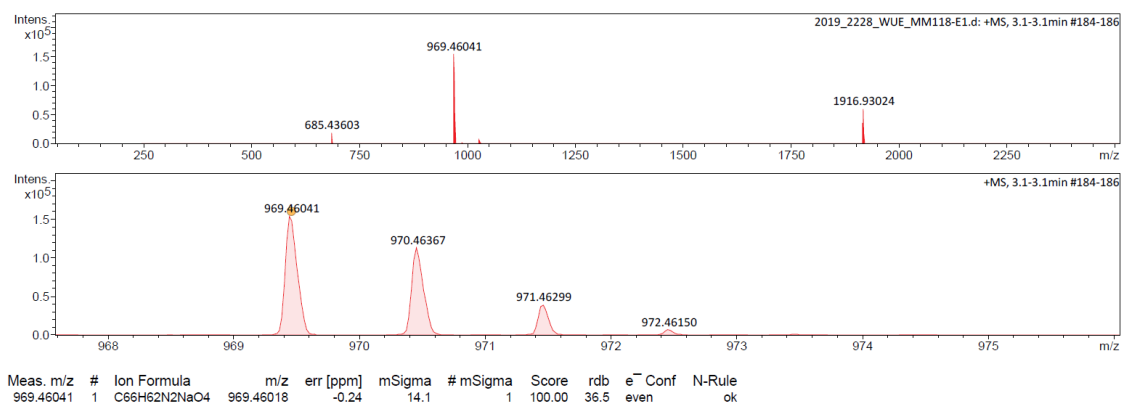

Figure S63. HRMS (ESI-TOF, pos. mode, acetonitrile/chloroform 1/1) spectra of 7c.

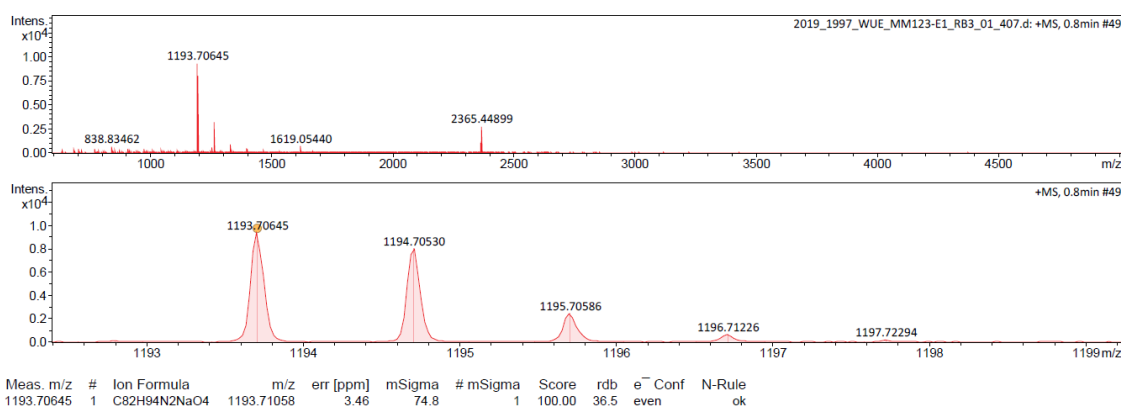

Figure S64. HRMS (ESI-TOF, pos. mode, acetonitrile/chloroform 1/1) spectra of 7d.

## SUPPORTING INFORMATION

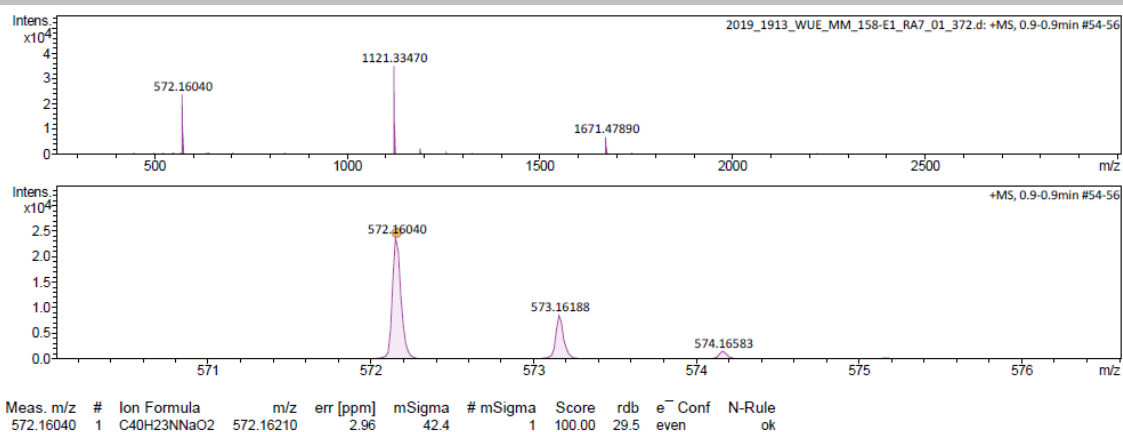Figure S65. HRMS (ESI-TOF, pos. mode, acetonitrile/chloroform 1/1) spectra of **8a**.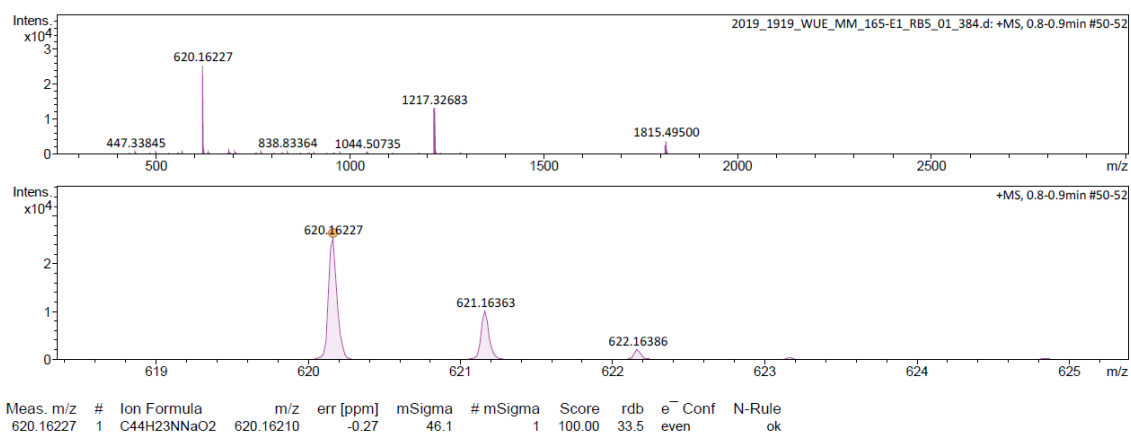Figure S66. HRMS (ESI-TOF, pos. mode, acetonitrile/chloroform 1/1) spectra of **8b**.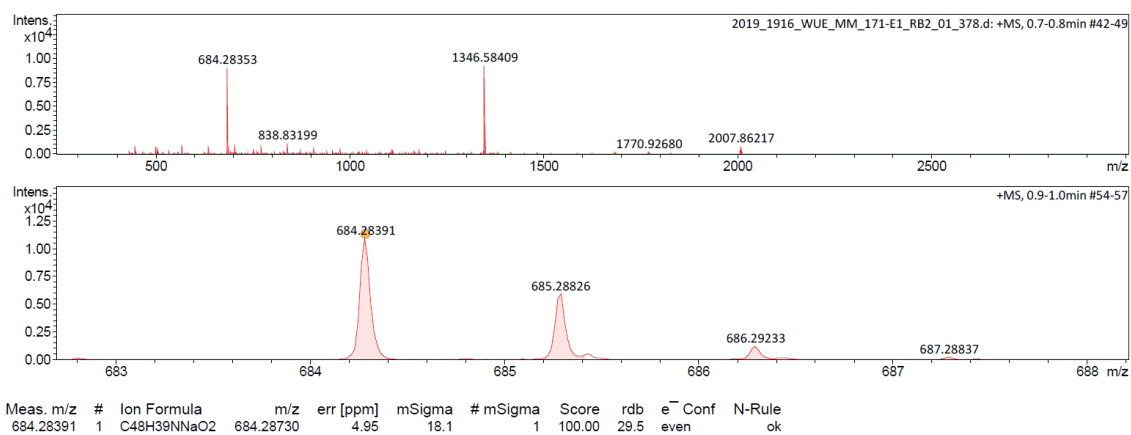Figure S67. HRMS (ESI-TOF, pos. mode, acetonitrile/chloroform 1/1) spectra of **8c**.

## SUPPORTING INFORMATION

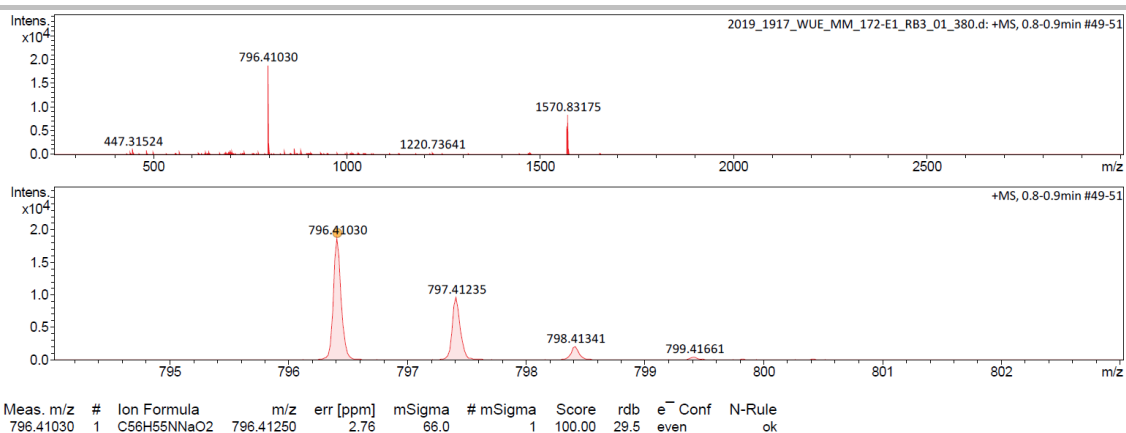

Figure S68. HRMS (ESI-TOF, pos. mode, acetonitrile/chloroform 1/1) spectra of **8d**.

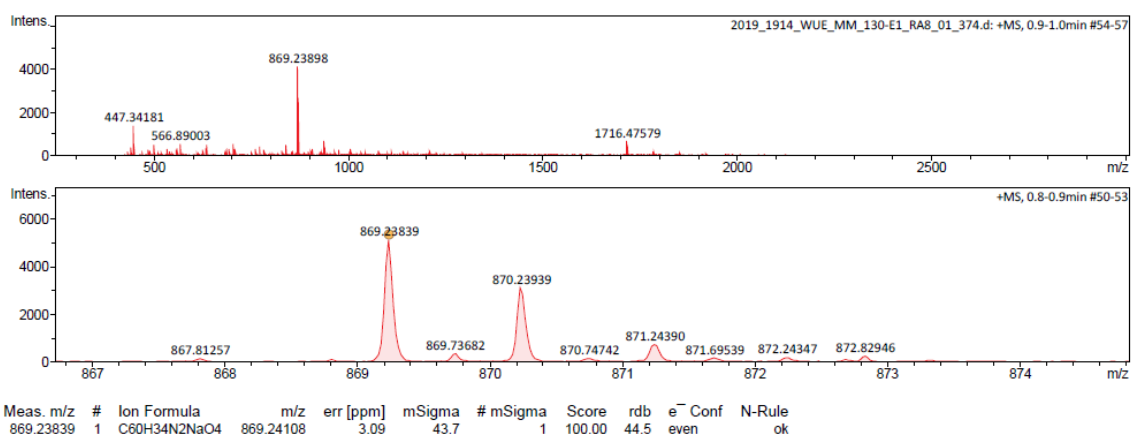

Figure S69. HRMS (ESI-TOF, pos. mode, acetonitrile/chloroform 1/1) spectra of **9a**.

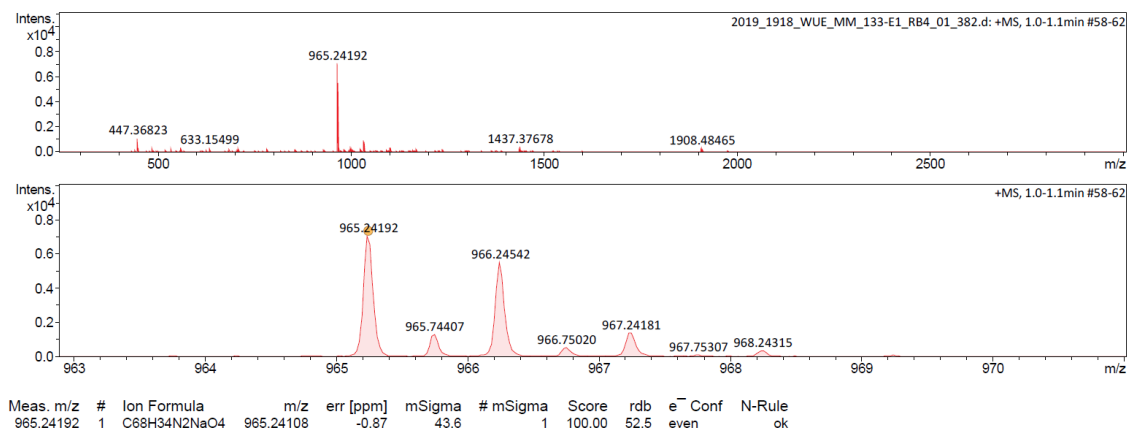

Figure S70. HRMS (ESI-TOF, pos. mode, acetonitrile/chloroform 1/1) spectra of **9b**.



## SUPPORTING INFORMATION

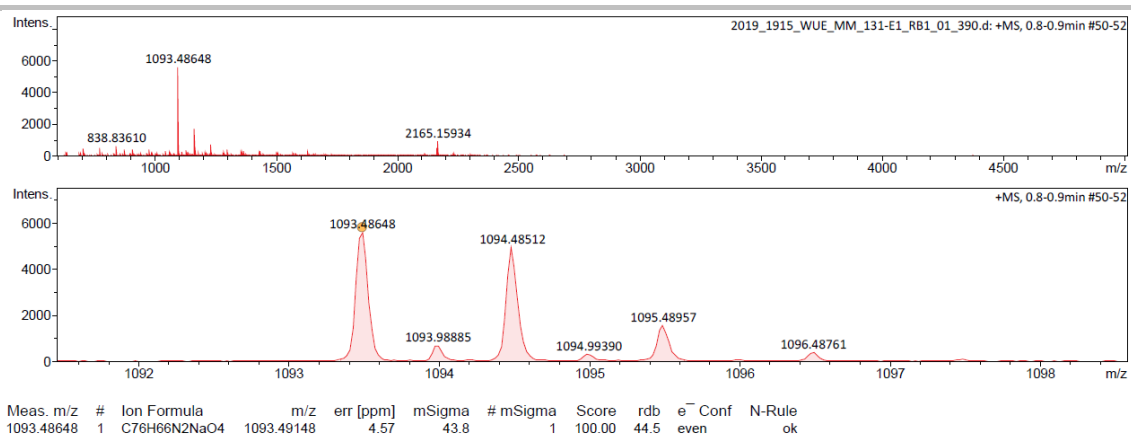Figure S71. HRMS (ESI-TOF, pos. mode, acetonitrile/chloroform 1/1) spectra of **9c**.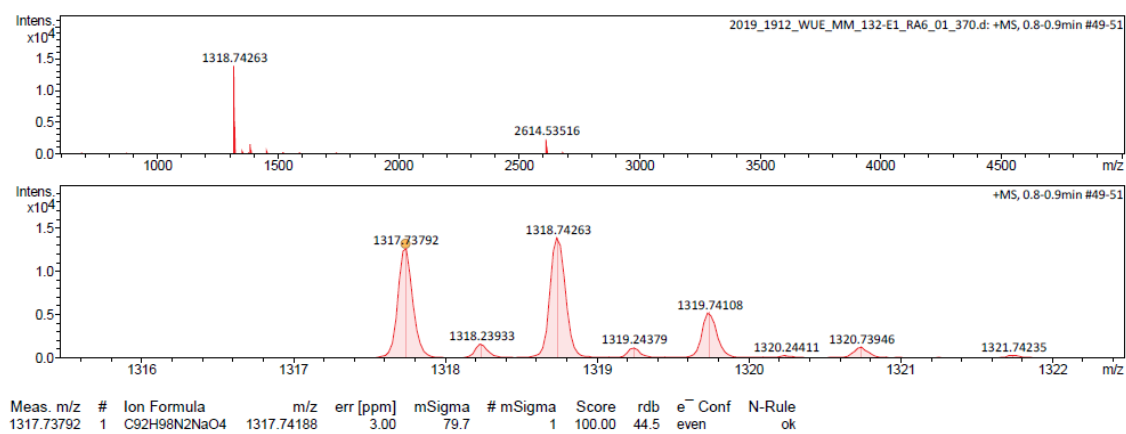Figure S72. HRMS (ESI-TOF, pos. mode, acetonitrile/chloroform 1/1) spectra of **9d**.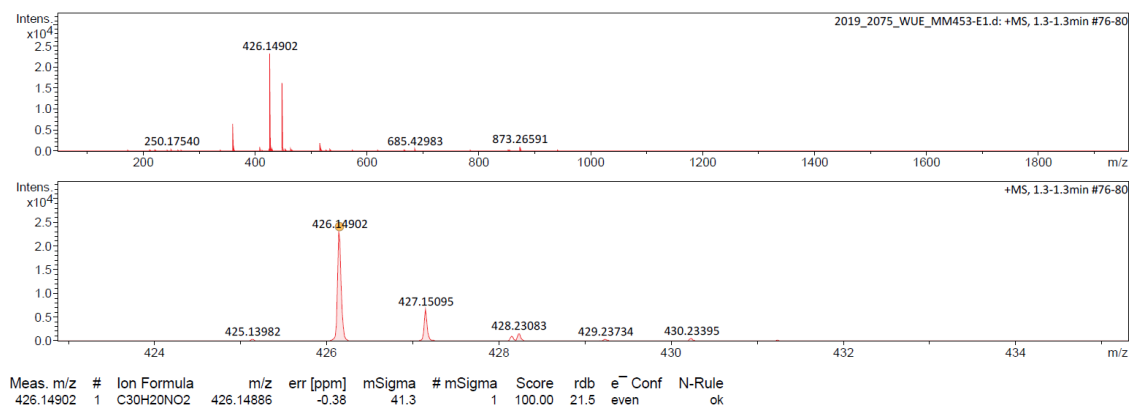Figure S73. HRMS (ESI-TOF, pos. mode, acetonitrile/chloroform 1/1) spectra of **10a**.

**References**

- [S1] G. M. Sheldrick, *Acta Cryst. A* **2015**, *71*, 3-8.
- [S2] Y. Miura, H. Oka, M. A. Momoki, *Synthesis* **1995**, *11*, 1419-1422.
- [S3] D. Meinhard, M. Wegner, G. Kipiani, A. Hearley, P. Reuter, S. Fischer, O. Marti, B. Rieger, *J. Am. Chem. Soc.* **2007**, *129*, 9182-9191.
- [S4] I. Gottker-Schnetmann, P. Wehrmann, C. Rohr, S. Mecking, *Organometallics* **2007**, *26*, 2348-2362.
- [S5] Y. Li, C. Wang, C. Li, S. Di Motta, F. Negri, Z. H. Wang, *Org. Lett.* **2012**, *14*, 5278-5281.
- [S6] H. Langhals, L. Feiler, US5650513A, **1995**.
- [S7] R. H. Mitchell, M. Chaudhary, R. V. Williams, R. Fyles, J. Gibson, M. J. Ashwoodsmith, A. J. Fry, *Can. J. Chem.* **1992**, *70*, 1015-1021.
